# Supplementary material for: Sequential Subterranean Transport of Excavated Sand and Foraged Seeds in Nests of the Harvester Ant, Pogonomyrmex badius
Source: PLoS One. 2015 Oct 28;10(10):e0139922. doi: 10.1371/journal.pone.0139922 (PMC4624972; doi:10.1371/journal.pone.0139922)
Supplement: S2 Data — (XLS) [file pone.0139922.s002.xls]

## Sheet: individual pellet composition
date of collection	origin	pellet number	grains of native	grains of chocolate	grains of green	grains of violet	grains of blue	grains of pink	grains of black	grains of lime	grains of purple	grains of orange	grains of yellow	grains of divot	grains of red clay	total grains	fraction native	fraction chocolate	fraction green	fraction violet	fraction blue	fraction pink	fraction black	fraction lime	fraction purple	fraction orange	fraction yellow	fraction divot	fraction clay	total colored grains	fraction of colored, chocolate	fraction of colored, green	fraction of colored, violet	fraction of colored, blue	fraction of colored, pink	fraction of colored, black	fraction of colored, lime	fraction of colored, purple	fraction of colored, orange	fraction of colored, yellow	fraction of colored, divot	fraction of colored, clay	nn	mean no. of each color	median no. of each color	mean/median ratio	variance	variance/mean	expected % chocolate (expected values are the means of % of each color for each date. )
2011-10-21	mound	1	76	2	17	6	4	2	2	0	0	0	0	0	0	109	0.697248	0.0183486	0.155963	0.0550459	0.0366972	0.0183486	0.0183486	0	0	0	0	0	0	33	0.0606061	0.515152	0.181818	0.121212	0.0606061	0.0606061	0	0	0	0	0	0		2.75	1	2.75	23.8409	8.66942	0.268818
2011-10-21	mound	2	117	2	49	3	0	0	2	0	0	0	0	0	0	173	0.676301	0.0115607	0.283237	0.017341	0	0	0.0115607	0	0	0	0	0	0	56	0.0357143	0.875	0.0535714	0	0	0.0357143	0	0	0	0	0	0		4.66667	0		196.061	42.013	0.268818
2011-10-21	mound	3	102	13	23	12	2	2	6	1	0	0	0	0	0	161	0.63354	0.0807453	0.142857	0.0745342	0.0124224	0.0124224	0.0372671	0.00621118	0	0	0	0	0	59	0.220339	0.389831	0.20339	0.0338983	0.0338983	0.101695	0.0169492	0	0	0	0	0		4.91667	1.5	3.27778	54.2652	11.037	0.268818
2011-10-21	mound	4	50	8	3	2	2	0	0	0	0	0	0	0	0	65	0.769231	0.123077	0.0461538	0.0307692	0.0307692	0	0	0	0	0	0	0	0	15	0.533333	0.2	0.133333	0.133333	0	0	0	0	0	0	0	0		1.25	0		5.65909	4.52727	0.268818
2011-10-21	mound	5	103	27	11	2	2	1	3	0	0	0	0	0	0	149	0.691275	0.181208	0.0738255	0.0134228	0.0134228	0.00671141	0.0201342	0	0	0	0	0	0	46	0.586957	0.23913	0.0434783	0.0434783	0.0217391	0.0652174	0	0	0	0	0	0		3.83333	0.5	7.66667	62.8788	16.4032	0.268818
2011-10-21	mound	6	145	5	11	1	71	1	1	0	0	0	0	0	0	235	0.617021	0.0212766	0.0468085	0.00425532	0.302128	0.00425532	0.00425532	0	0	0	0	0	0	90	0.0555556	0.122222	0.0111111	0.788889	0.0111111	0.0111111	0	0	0	0	0	0		7.5	0.5	15	410.455	54.7273	0.268818
2011-10-21	mound	7	150	13	21	20	39	0	2	0	0	0	0	0	0	245	0.612245	0.0530612	0.0857143	0.0816327	0.159184	0	0.00816327	0	0	0	0	0	0	95	0.136842	0.221053	0.210526	0.410526	0	0.0210526	0	0	0	0	0	0		7.91667	0		162.083	20.4737	0.268818
2011-10-21	mound	8	49	0	11	4	1	0	0	4	0	0	0	0	0	69	0.710145	0	0.15942	0.057971	0.0144928	0	0	0.057971	0	0	0	0	0	20	0	0.55	0.2	0.05	0	0	0.2	0	0	0	0	0		1.66667	0		10.9697	6.58182	0.268818
2011-10-21	mound	9	91	4	12	12	6	0	2	5	0	0	0	0	0	132	0.689394	0.030303	0.0909091	0.0909091	0.0454545	0	0.0151515	0.0378788	0	0	0	0	0	41	0.097561	0.292683	0.292683	0.146341	0	0.0487805	0.121951	0	0	0	0	0		3.41667	1	3.41667	20.8106	6.09091	0.268818
2011-10-21	mound	10	96	3	5	6	11	1	3	3	0	0	0	0	0	128	0.75	0.0234375	0.0390625	0.046875	0.0859375	0.0078125	0.0234375	0.0234375	0	0	0	0	0	32	0.09375	0.15625	0.1875	0.34375	0.03125	0.09375	0.09375	0	0	0	0	0		2.66667	2	1.33333	11.3333	4.25	0.268818
2011-10-21	mound	11	120	19	8	8	5	5	1	5	0	0	0	0	0	171	0.701754	0.111111	0.0467836	0.0467836	0.0292398	0.0292398	0.00584795	0.0292398	0	0	0	0	0	51	0.372549	0.156863	0.156863	0.0980392	0.0980392	0.0196078	0.0980392	0	0	0	0	0		4.25	3	1.41667	31.6591	7.4492	0.268818
2011-10-21	mound	12	14	0	2	3	0	0	0	0	0	0	0	0	0	19	0.736842	0	0.105263	0.157895	0	0	0	0	0	0	0	0	0	5	0	0.4	0.6	0	0	0	0	0	0	0	0	0		0.416667	0		0.992424	2.38182	0.268818
2011-10-21	mound	13	37	1	2	7	10	0	0	0	0	0	0	0	0	57	0.649123	0.0175439	0.0350877	0.122807	0.175439	0	0	0	0	0	0	0	0	20	0.05	0.1	0.35	0.5	0	0	0	0	0	0	0	0		1.66667	0		10.9697	6.58182	0.268818
2011-10-21	mound	14	86	1	1	50	2	0	1	0	0	0	0	0	0	141	0.609929	0.0070922	0.0070922	0.35461	0.0141844	0	0.0070922	0	0	0	0	0	0	55	0.0181818	0.0181818	0.909091	0.0363636	0	0.0181818	0	0	0	0	0	0		4.58333	0		204.992	44.7256	0.268818
2011-10-21	mound	15	98	2	22	10	16	0	1	0	0	0	0	0	0	149	0.657718	0.0134228	0.147651	0.0671141	0.107383	0	0.00671141	0	0	0	0	0	0	51	0.0392157	0.431373	0.196078	0.313725	0	0.0196078	0	0	0	0	0	0		4.25	0		57.1136	13.4385	0.268818
2011-10-21	mound	16	72	9	8	8	5	1	4	0	0	0	0	0	0	107	0.672897	0.0841121	0.0747664	0.0747664	0.046729	0.00934579	0.0373832	0	0	0	0	0	0	35	0.257143	0.228571	0.228571	0.142857	0.0285714	0.114286	0	0	0	0	0	0		2.91667	0.5	5.83333	13.5379	4.64156	0.268818
2011-10-21	mound	17	92	5	14	4	11	3	3	1	0	0	0	0	0	133	0.691729	0.037594	0.105263	0.0300752	0.0827068	0.0225564	0.0225564	0.0075188	0	0	0	0	0	41	0.121951	0.341463	0.097561	0.268293	0.0731707	0.0731707	0.0243902	0	0	0	0	0		3.41667	2	1.70833	21.5379	6.30377	0.268818
2011-10-21	mound	18	78	4	14	8	9	3	5	6	0	0	0	0	0	127	0.614173	0.0314961	0.110236	0.0629921	0.0708661	0.023622	0.0393701	0.0472441	0	0	0	0	0	49	0.0816327	0.285714	0.163265	0.183673	0.0612245	0.102041	0.122449	0	0	0	0	0		4.08333	3.5	1.16667	20.6288	5.05195	0.268818
2011-10-21	mound	19	69	9	9	10	2	1	2	0	0	0	0	0	0	102	0.676471	0.0882353	0.0882353	0.0980392	0.0196078	0.00980392	0.0196078	0	0	0	0	0	0	33	0.272727	0.272727	0.30303	0.0606061	0.030303	0.0606061	0	0	0	0	0	0		2.75	0.5	5.5	16.3864	5.95868	0.268818
2011-10-21	mound	20	121	25	27	7	5	7	8	2	0	0	0	0	0	202	0.59901	0.123762	0.133663	0.0346535	0.0247525	0.0346535	0.039604	0.00990099	0	0	0	0	0	81	0.308642	0.333333	0.0864198	0.0617284	0.0864198	0.0987654	0.0246914	0	0	0	0	0		6.75	3.5	1.92857	90.75	13.4444	0.268818
2011-10-21	mound	21	76	6	4	23	18	3	5	2	0	0	0	0	0	137	0.554745	0.0437956	0.0291971	0.167883	0.131387	0.0218978	0.0364964	0.0145985	0	0	0	0	0	61	0.0983607	0.0655738	0.377049	0.295082	0.0491803	0.0819672	0.0327869	0	0	0	0	0		5.08333	2.5	2.03333	57.5379	11.3189	0.268818
2011-10-21	mound	22	109	8	1	7	53	0	1	0	0	0	0	0	0	179	0.608939	0.0446927	0.00558659	0.0391061	0.296089	0	0.00558659	0	0	0	0	0	0	70	0.114286	0.0142857	0.1	0.757143	0	0.0142857	0	0	0	0	0	0		5.83333	0		228.697	39.2052	0.268818
2011-10-21	mound	23	73	1	0	54	4	0	1	0	0	0	0	0	0	133	0.548872	0.0075188	0	0.406015	0.0300752	0	0.0075188	0	0	0	0	0	0	60	0.0166667	0	0.9	0.0666667	0	0.0166667	0	0	0	0	0	0		5	0		239.455	47.8909	0.268818
2011-10-21	mound	24	72	4	34	6	3	0	2	0	0	0	0	0	0	121	0.595041	0.0330579	0.280992	0.0495868	0.0247934	0	0.0165289	0	0	0	0	0	0	49	0.0816327	0.693878	0.122449	0.0612245	0	0.0408163	0	0	0	0	0	0		4.08333	0		92.8106	22.7291	0.268818
2011-10-21	mound	25	79	10	11	20	5	3	2	0	0	0	0	0	0	130	0.607692	0.0769231	0.0846154	0.153846	0.0384615	0.0230769	0.0153846	0	0	0	0	0	0	51	0.196078	0.215686	0.392157	0.0980392	0.0588235	0.0392157	0	0	0	0	0	0		4.25	1	4.25	40.2045	9.45989	0.268818
2011-10-21	mound	26	68	4	24	9	9	1	4	0	0	0	0	0	0	119	0.571429	0.0336134	0.201681	0.0756303	0.0756303	0.00840336	0.0336134	0	0	0	0	0	0	51	0.0784314	0.470588	0.176471	0.176471	0.0196078	0.0784314	0	0	0	0	0	0		4.25	0.5	8.5	50.3864	11.8556	0.268818
2011-10-21	mound	27	147	14	6	15	7	10	3	1	0	0	0	0	0	203	0.724138	0.0689655	0.0295567	0.0738916	0.0344828	0.0492611	0.0147783	0.00492611	0	0	0	0	0	56	0.25	0.107143	0.267857	0.125	0.178571	0.0535714	0.0178571	0	0	0	0	0		4.66667	2	2.33333	32.2424	6.90909	0.268818
2011-10-21	mound	28	116	19	15	10	30	6	0	2	0	0	0	0	0	198	0.585859	0.0959596	0.0757576	0.0505051	0.151515	0.030303	0	0.010101	0	0	0	0	0	82	0.231707	0.182927	0.121951	0.365854	0.0731707	0	0.0243902	0	0	0	0	0		6.83333	1	6.83333	96.8788	14.1774	0.268818
2011-10-21	mound	29	83	0	24	18	1	4	1	1	0	0	0	0	0	132	0.628788	0	0.181818	0.136364	0.00757576	0.030303	0.00757576	0.00757576	0	0	0	0	0	49	0	0.489796	0.367347	0.0204082	0.0816327	0.0204082	0.0204082	0	0	0	0	0		4.08333	0.5	8.16667	65.3561	16.0056	0.268818
2011-10-21	mound	30	40	0	1	1	2	18	1	0	0	0	0	0	0	63	0.634921	0	0.015873	0.015873	0.031746	0.285714	0.015873	0	0	0	0	0	0	23	0	0.0434783	0.0434783	0.0869565	0.782609	0.0434783	0	0	0	0	0	0		1.91667	0		26.0833	13.6087	0.268818
2011-10-21	mound	31	89	1	8	6	41	2	2	1	0	0	0	0	0	150	0.593333	0.00666667	0.0533333	0.04	0.273333	0.0133333	0.0133333	0.00666667	0	0	0	0	0	61	0.0163934	0.131148	0.0983607	0.672131	0.0327869	0.0327869	0.0163934	0	0	0	0	0		5.08333	1	5.08333	134.629	26.4844	0.268818
2011-10-21	mound	32	59	0	2	4	0	39	0	1	0	0	0	0	0	105	0.561905	0	0.0190476	0.0380952	0	0.371429	0	0.00952381	0	0	0	0	0	46	0	0.0434783	0.0869565	0	0.847826	0	0.0217391	0	0	0	0	0		3.83333	0		124.152	32.3874	0.268818
2011-10-21	mound	33	112	65	0	4	4	0	1	2	0	0	0	0	0	188	0.595745	0.345745	0	0.0212766	0.0212766	0	0.00531915	0.0106383	0	0	0	0	0	76	0.855263	0	0.0526316	0.0526316	0	0.0131579	0.0263158	0	0	0	0	0		6.33333	0		343.697	54.2679	0.268818
2011-10-21	mound	34	65	25	10	3	2	1	0	0	0	0	0	0	0	106	0.613208	0.235849	0.0943396	0.0283019	0.0188679	0.00943396	0	0	0	0	0	0	0	41	0.609756	0.243902	0.0731707	0.0487805	0.0243902	0	0	0	0	0	0	0		3.41667	0		54.447	15.9357	0.268818
2011-10-21	mound	35	72	2	9	10	1	27	2	1	0	0	0	0	0	124	0.580645	0.016129	0.0725806	0.0806452	0.00806452	0.217742	0.016129	0.00806452	0	0	0	0	0	52	0.0384615	0.173077	0.192308	0.0192308	0.519231	0.0384615	0.0192308	0	0	0	0	0		4.33333	1	4.33333	63.1515	14.5734	0.268818
2011-10-21	mound	36	95	39	27	2	0	0	2	0	0	0	0	0	0	165	0.575758	0.236364	0.163636	0.0121212	0	0	0.0121212	0	0	0	0	0	0	70	0.557143	0.385714	0.0285714	0	0	0.0285714	0	0	0	0	0	0		5.83333	0		168.152	28.826	0.268818
2011-10-21	mound	37	111	22	13	7	13	3	0	1	0	0	0	0	0	170	0.652941	0.129412	0.0764706	0.0411765	0.0764706	0.0176471	0	0.00588235	0	0	0	0	0	59	0.372881	0.220339	0.118644	0.220339	0.0508475	0	0.0169492	0	0	0	0	0		4.91667	0.5	9.83333	53.7197	10.926	0.268818
2011-10-21	mound	38	109	6	17	13	26	18	7	0	0	0	0	0	0	196	0.556122	0.0306122	0.0867347	0.0663265	0.132653	0.0918367	0.0357143	0	0	0	0	0	0	87	0.0689655	0.195402	0.149425	0.298851	0.206897	0.0804598	0	0	0	0	0	0		7.25	3	2.41667	82.9318	11.4389	0.268818
2011-10-21	mound	39	127	3	1	6	0	51	3	0	0	0	0	0	0	191	0.664921	0.0157068	0.0052356	0.0314136	0	0.267016	0.0157068	0	0	0	0	0	0	64	0.046875	0.015625	0.09375	0	0.796875	0.046875	0	0	0	0	0	0		5.33333	0		210.424	39.4545	0.268818
2011-10-21	mound	40	117	1	0	2	87	1	2	1	0	0	0	0	0	211	0.554502	0.00473934	0	0.00947867	0.412322	0.00473934	0.00947867	0.00473934	0	0	0	0	0	94	0.0106383	0	0.0212766	0.925532	0.0106383	0.0212766	0.0106383	0	0	0	0	0		7.83333	0.5	15.6667	622.152	79.4236	0.268818
2011-10-21	mound	41	66	0	0	0	0	0	3	46	0	0	0	0	0	115	0.573913	0	0	0	0	0	0.026087	0.4	0	0	0	0	0	49	0	0	0	0	0	0.0612245	0.938776	0	0	0	0	0		4.08333	0		174.992	42.8553	0.268818
2011-10-21	mound	42	126	3	1	73	13	1	3	2	0	0	0	0	0	222	0.567568	0.0135135	0.0045045	0.328829	0.0585586	0.0045045	0.0135135	0.00900901	0	0	0	0	0	96	0.03125	0.0104167	0.760417	0.135417	0.0104167	0.03125	0.0208333	0	0	0	0	0		8	1	8	432.182	54.0227	0.268818
2011-10-21	mound	43	71	1	35	2	0	0	1	0	1	0	0	2	0	113	0.628319	0.00884956	0.309735	0.0176991	0	0	0.00884956	0	0.00884956	0	0	0.0176991	0	42	0.0238095	0.833333	0.047619	0	0	0.0238095	0	0.0238095	0	0	0.047619	0		3.5	0.5	7	99	28.2857	0.268818
2011-10-21	mound	44	111	4	4	0	1	0	1	62	0	0	0	2	0	185	0.6	0.0216216	0.0216216	0	0.00540541	0	0.00540541	0.335135	0	0	0	0.0108108	0	74	0.0540541	0.0540541	0	0.0135135	0	0.0135135	0.837838	0	0	0	0.027027	0		6.16667	0.5	12.3333	311.424	50.5012	0.268818
2011-10-21	mound	45	138	1	2	81	0	1	3	1	0	0	0	0	0	227	0.60793	0.00440529	0.00881057	0.356828	0	0.00440529	0.0132159	0.00440529	0	0	0	0	0	89	0.011236	0.0224719	0.910112	0	0.011236	0.0337079	0.011236	0	0	0	0	0		7.41667	0.5	14.8333	537.902	72.526	0.268818
2011-10-21	mound	46	123	7	82	0	1	0	2	0	0	0	0	1	0	216	0.569444	0.0324074	0.37963	0	0.00462963	0	0.00925926	0	0	0	0	0.00462963	0	93	0.0752688	0.88172	0	0.0107527	0	0.0215054	0	0	0	0	0.0107527	0		7.75	0		550.75	71.0645	0.268818
2011-10-21	mound	47	92	0	27	20	1	0	0	1	0	0	0	0	0	141	0.652482	0	0.191489	0.141844	0.0070922	0	0	0.0070922	0	0	0	0	0	49	0	0.55102	0.408163	0.0204082	0	0	0.0204082	0	0	0	0	0		4.08333	0		84.6288	20.7254	0.268818
2011-10-21	mound	48	125	0	72	0	0	0	5	0	0	0	0	0	0	202	0.618812	0	0.356436	0	0	0	0.0247525	0	0	0	0	0	0	77	0	0.935065	0	0	0	0.0649351	0	0	0	0	0	0		6.41667	0		428.629	66.7993	0.268818
2011-10-21	mound	49	93	10	1	4	5	24	1	0	0	0	0	0	0	138	0.673913	0.0724638	0.00724638	0.0289855	0.0362319	0.173913	0.00724638	0	0	0	0	0	0	45	0.222222	0.0222222	0.0888889	0.111111	0.533333	0.0222222	0	0	0	0	0	0		3.75	0.5	7.5	50.0227	13.3394	0.268818
2011-10-21	mound	50	105	1	39	6	5	0	1	0	0	0	0	0	0	157	0.66879	0.00636943	0.248408	0.0382166	0.0318471	0	0.00636943	0	0	0	0	0	0	52	0.0192308	0.75	0.115385	0.0961538	0	0.0192308	0	0	0	0	0	0		4.33333	0		123.515	28.5035	0.268818
2011-10-21	mound	51	87	9	11	10	1	2	5	0	0	0	0	0	0	125	0.696	0.072	0.088	0.08	0.008	0.016	0.04	0	0	0	0	0	0	38	0.236842	0.289474	0.263158	0.0263158	0.0526316	0.131579	0	0	0	0	0	0		3.16667	0.5	6.33333	19.2424	6.07656	0.268818
2011-10-21	mound	52	107	26	14	0	2	0	2	34	0	0	0	0	0	185	0.578378	0.140541	0.0756757	0	0.0108108	0	0.0108108	0.183784	0	0	0	0	0	78	0.333333	0.179487	0	0.025641	0	0.025641	0.435897	0	0	0	0	0		6.5	0		139	21.3846	0.268818
2011-10-21	mound	53	104	1	0	1	0	1	0	63	0	0	0	0	0	170	0.611765	0.00588235	0	0.00588235	0	0.00588235	0	0.370588	0	0	0	0	0	66	0.0151515	0	0.0151515	0	0.0151515	0	0.954545	0	0	0	0	0		5.5	0		328.091	59.6529	0.268818
2011-10-22	mound	1	205	14	14	4	4	2	1	0	0	0	0	0	0	244	0.840164	0.057377	0.057377	0.0163934	0.0163934	0.00819672	0.00409836	0	0	0	0	0	0	39	0.358974	0.358974	0.102564	0.102564	0.0512821	0.025641	0	0	0	0	0	0		3.25	0.5	6.5	27.4773	8.45455	0.211495
2011-10-22	mound	2	107	1	1	0	0	61	0	0	0	0	0	0	0	170	0.629412	0.00588235	0.00588235	0	0	0.358824	0	0	0	0	0	0	0	63	0.015873	0.015873	0	0	0.968254	0	0	0	0	0	0	0		5.25	0		308.386	58.7403	0.211495
2011-10-22	mound	3	142	45	1	0	0	0	4	0	0	0	0	0	0	192	0.739583	0.234375	0.00520833	0	0	0	0.0208333	0	0	0	0	0	0	50	0.9	0.02	0	0	0	0.08	0	0	0	0	0	0		4.16667	0		166.697	40.0073	0.211495
2011-10-22	mound	4	159	6	1	0	0	0	2	3	0	0	0	0	0	171	0.929825	0.0350877	0.00584795	0	0	0	0.0116959	0.0175439	0	0	0	0	0	12	0.5	0.0833333	0	0	0	0.166667	0.25	0	0	0	0	0		1	0		3.45455	3.45455	0.211495
2011-10-22	mound	5	94	0	2	84	0	0	3	0	0	0	0	0	0	183	0.513661	0	0.010929	0.459016	0	0	0.0163934	0	0	0	0	0	0	89	0	0.0224719	0.94382	0	0	0.0337079	0	0	0	0	0	0		7.41667	0		582.629	78.5567	0.211495
2011-10-22	mound	6	88	0	8	4	38	1	6	0	0	0	0	0	0	145	0.606897	0	0.0551724	0.0275862	0.262069	0.00689655	0.0413793	0	0	0	0	0	0	57	0	0.140351	0.0701754	0.666667	0.0175439	0.105263	0	0	0	0	0	0		4.75	0		117.295	24.6938	0.211495
2011-10-22	mound	7	125	3	86	2	7	0	4	0	0	0	0	0	0	227	0.550661	0.0132159	0.378855	0.00881057	0.030837	0	0.0176211	0	0	0	0	0	0	102	0.0294118	0.843137	0.0196078	0.0686275	0	0.0392157	0	0	0	0	0	0		8.5	0		600.636	70.6631	0.211495
2011-10-22	mound	8	191	6	0	0	1	0	4	0	0	0	0	0	0	202	0.945545	0.029703	0	0	0.0049505	0	0.019802	0	0	0	0	0	0	11	0.545455	0	0	0.0909091	0	0.363636	0	0	0	0	0	0		0.916667	0		3.90152	4.2562	0.211495
2011-10-22	mound	9	82	0	1	0	2	48	4	0	0	0	0	0	0	137	0.59854	0	0.00729927	0	0.0145985	0.350365	0.0291971	0	0	0	0	0	0	55	0	0.0181818	0	0.0363636	0.872727	0.0727273	0	0	0	0	0	0		4.58333	0		188.447	41.1157	0.211495
2011-10-22	mound	10	139	8	42	23	25	4	0	1	0	0	0	0	0	242	0.57438	0.0330579	0.173554	0.0950413	0.103306	0.0165289	0	0.00413223	0	0	0	0	0	103	0.0776699	0.407767	0.223301	0.242718	0.038835	0	0.00970874	0	0	0	0	0		8.58333	0.5	17.1667	192.265	22.3998	0.211495
2011-10-22	mound	11	100	0	1	2	73	1	2	0	0	0	0	0	0	179	0.558659	0	0.00558659	0.0111732	0.407821	0.00558659	0.0111732	0	0	0	0	0	0	79	0	0.0126582	0.0253165	0.924051	0.0126582	0.0253165	0	0	0	0	0	0		6.58333	0		438.083	66.5443	0.211495
2011-10-22	mound	12	110	0	0	75	1	0	0	0	0	0	0	0	0	186	0.591398	0	0	0.403226	0.00537634	0	0	0	0	0	0	0	0	76	0	0	0.986842	0.0131579	0	0	0	0	0	0	0	0		6.33333	0		467.697	73.8469	0.211495
2011-10-22	mound	13	151	6	68	3	5	3	3	0	0	0	0	0	0	239	0.631799	0.0251046	0.284519	0.0125523	0.0209205	0.0125523	0.0125523	0	0	0	0	0	0	88	0.0681818	0.772727	0.0340909	0.0568182	0.0340909	0.0340909	0	0	0	0	0	0		7.33333	1.5	4.88889	369.697	50.4132	0.211495
2011-10-22	mound	14	139	2	0	1	110	0	1	0	0	0	0	0	0	253	0.549407	0.00790514	0	0.00395257	0.434783	0	0.00395257	0	0	0	0	0	0	114	0.0175439	0	0.00877193	0.964912	0	0.00877193	0	0	0	0	0	0		9.5	0		1002.09	105.483	0.211495
2011-10-22	mound	15	162	97	1	0	0	0	0	0	0	0	0	0	0	260	0.623077	0.373077	0.00384615	0	0	0	0	0	0	0	0	0	0	98	0.989796	0.0102041	0	0	0	0	0	0	0	0	0	0		8.16667	0		782.697	95.8404	0.211495
2011-10-22	mound	16	131	4	62	2	1	0	3	3	0	0	0	0	0	206	0.635922	0.0194175	0.300971	0.00970874	0.00485437	0	0.0145631	0.0145631	0	0	0	0	0	75	0.0533333	0.826667	0.0266667	0.0133333	0	0.04	0.04	0	0	0	0	0		6.25	0.5	12.5	310.386	49.6618	0.211495
2011-10-22	mound	17	126	1	0	1	73	0	0	0	0	0	0	0	0	201	0.626866	0.00497512	0	0.00497512	0.363184	0	0	0	0	0	0	0	0	75	0.0133333	0	0.0133333	0.973333	0	0	0	0	0	0	0	0		6.25	0		442.023	70.7236	0.211495
2011-10-22	mound	18	132	2	0	82	1	0	0	0	0	0	0	0	0	217	0.608295	0.00921659	0	0.37788	0.00460829	0	0	0	0	0	0	0	0	85	0.0235294	0	0.964706	0.0117647	0	0	0	0	0	0	0	0		7.08333	0		556.992	78.6342	0.211495
2011-10-22	mound	19	146	3	6	3	3	41	0	0	0	0	0	0	0	202	0.722772	0.0148515	0.029703	0.0148515	0.0148515	0.20297	0	0	0	0	0	0	0	56	0.0535714	0.107143	0.0535714	0.0535714	0.732143	0	0	0	0	0	0	0		4.66667	0		134.788	28.8831	0.211495
2011-10-22	mound	20	121	3	2	1	7	1	4	1	0	0	0	0	0	140	0.864286	0.0214286	0.0142857	0.00714286	0.05	0.00714286	0.0285714	0.00714286	0	0	0	0	0	19	0.157895	0.105263	0.0526316	0.368421	0.0526316	0.210526	0.0526316	0	0	0	0	0		1.58333	1	1.58333	4.62879	2.92344	0.211495
2011-10-22	mound	21	90	6	29	4	16	0	0	0	0	0	0	0	0	145	0.62069	0.0413793	0.2	0.0275862	0.110345	0	0	0	0	0	0	0	0	55	0.109091	0.527273	0.0727273	0.290909	0	0	0	0	0	0	0	0		4.58333	0		81.5379	17.7901	0.211495
2011-10-22	mound	22	108	30	10	12	13	5	3	0	0	0	0	0	0	181	0.596685	0.165746	0.0552486	0.0662983	0.0718232	0.0276243	0.0165746	0	0	0	0	0	0	73	0.410959	0.136986	0.164384	0.178082	0.0684932	0.0410959	0	0	0	0	0	0		6.08333	1.5	4.05556	82.0833	13.4932	0.211495
2011-10-22	mound	23	221	4	20	28	12	23	5	1	0	0	0	0	0	314	0.703822	0.0127389	0.0636943	0.089172	0.0382166	0.0732484	0.0159236	0.00318471	0	0	0	0	0	93	0.0430108	0.215054	0.301075	0.129032	0.247312	0.0537634	0.0107527	0	0	0	0	0		7.75	2.5	3.1	107.114	13.8211	0.211495
2011-10-22	mound	24	128	1	0	0	103	1	0	0	0	0	0	0	0	233	0.549356	0.00429185	0	0	0.44206	0.00429185	0	0	0	0	0	0	0	105	0.00952381	0	0	0.980952	0.00952381	0	0	0	0	0	0	0		8.75	0		881.114	100.699	0.211495
2011-10-22	mound	25	97	5	5	4	9	2	1	0	0	0	0	0	0	123	0.788618	0.0406504	0.0406504	0.0325203	0.0731707	0.0162602	0.00813008	0	0	0	0	0	0	26	0.192308	0.192308	0.153846	0.346154	0.0769231	0.0384615	0	0	0	0	0	0		2.16667	0.5	4.33333	8.69697	4.01399	0.211495
2011-10-22	mound	26	67	2	11	4	4	8	0	0	0	0	0	0	0	96	0.697917	0.0208333	0.114583	0.0416667	0.0416667	0.0833333	0	0	0	0	0	0	0	29	0.0689655	0.37931	0.137931	0.137931	0.275862	0	0	0	0	0	0	0		2.41667	0		13.7197	5.67712	0.211495
2011-10-22	mound	27	93	4	11	20	33	8	2	6	0	0	0	0	0	177	0.525424	0.0225989	0.0621469	0.112994	0.186441	0.0451977	0.0112994	0.0338983	0	0	0	0	0	84	0.047619	0.130952	0.238095	0.392857	0.0952381	0.0238095	0.0714286	0	0	0	0	0		7	3	2.33333	103.818	14.8312	0.211495
2011-10-22	mound	28	80	0	0	0	59	0	0	0	0	0	0	0	0	139	0.57554	0	0	0	0.42446	0	0	0	0	0	0	0	0	59	0	0	0	1	0	0	0	0	0	0	0	0		4.91667	0		290.083	59	0.211495
2011-10-22	mound	29	93	0	70	1	1	2	1	0	0	0	0	0	0	168	0.553571	0	0.416667	0.00595238	0.00595238	0.0119048	0.00595238	0	0	0	0	0	0	75	0	0.933333	0.0133333	0.0133333	0.0266667	0.0133333	0	0	0	0	0	0		6.25	0		403.477	64.5564	0.211495
2011-10-22	mound	30	93	16	3	3	4	5	4	0	0	0	0	0	0	128	0.726562	0.125	0.0234375	0.0234375	0.03125	0.0390625	0.03125	0	0	0	0	0	0	35	0.457143	0.0857143	0.0857143	0.114286	0.142857	0.114286	0	0	0	0	0	0		2.91667	1.5	1.94444	20.8106	7.13506	0.211495
2011-10-22	mound	31	86	9	5	14	10	5	0	0	0	0	0	0	0	129	0.666667	0.0697674	0.0387597	0.108527	0.0775194	0.0387597	0	0	0	0	0	0	0	43	0.209302	0.116279	0.325581	0.232558	0.116279	0	0	0	0	0	0	0		3.58333	0		24.8106	6.92389	0.211495
2011-10-22	mound	32	74	0	1	14	45	0	1	0	0	0	0	0	0	135	0.548148	0	0.00740741	0.103704	0.333333	0	0.00740741	0	0	0	0	0	0	61	0	0.0163934	0.229508	0.737705	0	0.0163934	0	0	0	0	0	0		5.08333	0		173.902	34.2101	0.211495
2011-10-22	mound	33	81	2	1	3	58	0	0	0	0	0	0	0	0	145	0.558621	0.0137931	0.00689655	0.0206897	0.4	0	0	0	0	0	0	0	0	64	0.03125	0.015625	0.046875	0.90625	0	0	0	0	0	0	0	0		5.33333	0		276.061	51.7614	0.211495
2011-10-22	mound	34	104	24	0	36	0	0	3	1	0	0	0	0	0	168	0.619048	0.142857	0	0.214286	0	0	0.0178571	0.00595238	0	0	0	0	0	64	0.375	0	0.5625	0	0	0.046875	0.015625	0	0	0	0	0		5.33333	0		140.061	26.2614	0.211495
2011-10-22	mound	35	98	7	58	1	2	7	5	0	0	0	0	0	0	178	0.550562	0.0393258	0.325843	0.00561798	0.011236	0.0393258	0.0280899	0	0	0	0	0	0	80	0.0875	0.725	0.0125	0.025	0.0875	0.0625	0	0	0	0	0	0		6.66667	0.5	13.3333	268.97	40.3455	0.211495
2011-10-22	mound	36	109	1	0	6	0	42	1	1	0	0	0	0	0	160	0.68125	0.00625	0	0.0375	0	0.2625	0.00625	0.00625	0	0	0	0	0	51	0.0196078	0	0.117647	0	0.823529	0.0196078	0.0196078	0	0	0	0	0		4.25	0		144.205	33.9305	0.211495
2011-10-22	mound	37	107	1	2	61	1	3	4	0	0	0	0	0	0	179	0.597765	0.00558659	0.0111732	0.340782	0.00558659	0.0167598	0.0223464	0	0	0	0	0	0	72	0.0138889	0.0277778	0.847222	0.0138889	0.0416667	0.0555556	0	0	0	0	0	0		6	0.5	12	301.818	50.303	0.211495
2011-10-22	mound	38	103	13	5	5	15	16	16	1	0	0	0	0	0	174	0.591954	0.0747126	0.0287356	0.0287356	0.0862069	0.091954	0.091954	0.00574713	0	0	0	0	0	71	0.183099	0.0704225	0.0704225	0.211268	0.225352	0.225352	0.0140845	0	0	0	0	0		5.91667	3	1.97222	48.8106	8.24968	0.211495
2011-10-22	mound	39	89	0	4	51	2	2	4	6	0	0	0	0	0	158	0.563291	0	0.0253165	0.322785	0.0126582	0.0126582	0.0253165	0.0379747	0	0	0	0	0	69	0	0.057971	0.73913	0.0289855	0.0289855	0.057971	0.0869565	0	0	0	0	0		5.75	1	5.75	207.295	36.0514	0.211495
2011-10-22	mound	40	90	1	1	1	71	1	0	0	0	0	0	0	0	165	0.545455	0.00606061	0.00606061	0.00606061	0.430303	0.00606061	0	0	0	0	0	0	0	75	0.0133333	0.0133333	0.0133333	0.946667	0.0133333	0	0	0	0	0	0	0		6.25	0		416.023	66.5636	0.211495
2011-10-22	mound	41	74	0	6	58	2	3	0	0	0	0	0	0	0	143	0.517483	0	0.041958	0.405594	0.013986	0.020979	0	0	0	0	0	0	0	69	0	0.0869565	0.84058	0.0289855	0.0434783	0	0	0	0	0	0	0		5.75	0		274.205	47.6877	0.211495
2011-10-22	mound	42	148	98	0	8	2	0	0	0	0	0	0	0	0	256	0.578125	0.382812	0	0.03125	0.0078125	0	0	0	0	0	0	0	0	108	0.907407	0	0.0740741	0.0185185	0	0	0	0	0	0	0	0		9	0		790.909	87.8788	0.211495
2011-10-22	mound	43	176	1	6	2	1	77	4	0	0	1	0	0	0	268	0.656716	0.00373134	0.0223881	0.00746269	0.00373134	0.287313	0.0149254	0	0	0.00373134	0	0	0	92	0.0108696	0.0652174	0.0217391	0.0108696	0.836957	0.0434783	0	0	0.0108696	0	0	0		7.66667	1	7.66667	480.242	62.6403	0.211495
2011-10-22	mound	44	131	5	1	3	72	2	2	0	0	0	0	0	0	216	0.606481	0.0231481	0.00462963	0.0138889	0.333333	0.00925926	0.00925926	0	0	0	0	0	0	85	0.0588235	0.0117647	0.0352941	0.847059	0.0235294	0.0235294	0	0	0	0	0	0		7.08333	0.5	14.1667	420.447	59.3572	0.211495
2011-10-22	mound	45	130	1	1	80	0	0	0	0	0	0	0	0	0	212	0.613208	0.00471698	0.00471698	0.377358	0	0	0	0	0	0	0	0	0	82	0.0121951	0.0121951	0.97561	0	0	0	0	0	0	0	0	0		6.83333	0		531.061	77.7162	0.211495
2011-10-22	mound	46	109	1	83	0	0	0	1	0	0	0	0	0	0	194	0.561856	0.00515464	0.427835	0	0	0	0.00515464	0	0	0	0	0	0	85	0.0117647	0.976471	0	0	0	0.0117647	0	0	0	0	0	0		7.08333	0		571.72	80.7134	0.211495
2011-10-22	mound	47	110	1	2	55	2	0	0	0	0	0	0	0	0	170	0.647059	0.00588235	0.0117647	0.323529	0.0117647	0	0	0	0	0	0	0	0	60	0.0166667	0.0333333	0.916667	0.0333333	0	0	0	0	0	0	0	0		5	0		248.545	49.7091	0.211495
2011-10-22	mound	48	135	1	0	1	103	1	3	0	0	0	0	0	0	244	0.553279	0.00409836	0	0.00409836	0.422131	0.00409836	0.0122951	0	0	0	0	0	0	109	0.00917431	0	0.00917431	0.944954	0.00917431	0.0275229	0	0	0	0	0	0		9.08333	0		875.538	96.3895	0.211495
2011-10-23	mound	1	94	5	28	18	4	8	1	0	0	0	0	0	0	158	0.594937	0.0316456	0.177215	0.113924	0.0253165	0.0506329	0.00632911	0	0	0	0	0	0	64	0.078125	0.4375	0.28125	0.0625	0.125	0.015625	0	0	0	0	0	0		5.33333	0.5	10.6667	79.3333	14.875	0.121369
2011-10-23	mound	2	92	1	2	1	2	26	0	1	28	0	0	0	0	153	0.601307	0.00653595	0.0130719	0.00653595	0.0130719	0.169935	0	0.00653595	0.183007	0	0	0	0	61	0.0163934	0.0327869	0.0163934	0.0327869	0.42623	0	0.0163934	0.459016	0	0	0	0		5.08333	1	5.08333	105.538	20.7615	0.121369
2011-10-23	mound	3	102	0	0	0	0	65	0	0	0	0	0	0	0	167	0.610778	0	0	0	0	0.389222	0	0	0	0	0	0	0	65	0	0	0	0	1	0	0	0	0	0	0	0		5.41667	0		352.083	65	0.121369
2011-10-23	mound	4	105	0	81	3	0	0	0	0	0	0	0	0	0	189	0.555556	0	0.428571	0.015873	0	0	0	0	0	0	0	0	0	84	0	0.964286	0.0357143	0	0	0	0	0	0	0	0	0		7	0		543.818	77.6883	0.121369
2011-10-23	mound	5	153	1	2	4	2	73	0	0	0	0	0	0	0	235	0.651064	0.00425532	0.00851064	0.0170213	0.00851064	0.310638	0	0	0	0	0	0	0	82	0.0121951	0.0243902	0.0487805	0.0243902	0.890244	0	0	0	0	0	0	0		6.83333	0		435.788	63.7738	0.121369
2011-10-23	mound	6	126	0	1	0	37	55	0	0	0	0	0	0	0	219	0.575342	0	0.00456621	0	0.16895	0.251142	0	0	0	0	0	0	0	93	0	0.0107527	0	0.397849	0.591398	0	0	0	0	0	0	0		7.75	0		334.023	43.0997	0.121369
2011-10-23	mound	7	136	0	0	96	1	0	3	0	0	0	0	0	0	236	0.576271	0	0	0.40678	0.00423729	0	0.0127119	0	0	0	0	0	0	100	0	0	0.96	0.01	0	0.03	0	0	0	0	0	0		8.33333	0		762.97	91.5564	0.121369
2011-10-23	mound	8	107	14	41	3	0	0	0	0	0	0	0	0	0	165	0.648485	0.0848485	0.248485	0.0181818	0	0	0	0	0	0	0	0	0	58	0.241379	0.706897	0.0517241	0	0	0	0	0	0	0	0	0		4.83333	0		145.97	30.2006	0.121369
2011-10-23	mound	9	98	0	0	0	0	71	1	0	0	0	0	0	0	170	0.576471	0	0	0	0	0.417647	0.00588235	0	0	0	0	0	0	72	0	0	0	0	0.986111	0.0138889	0	0	0	0	0	0		6	0		419.091	69.8485	0.121369
2011-10-23	mound	10	114	3	5	23	10	24	0	0	8	0	0	0	0	187	0.609626	0.0160428	0.026738	0.122995	0.0534759	0.128342	0	0	0.0427807	0	0	0	0	73	0.0410959	0.0684932	0.315068	0.136986	0.328767	0	0	0.109589	0	0	0	0		6.08333	1.5	4.05556	78.0833	12.8356	0.121369
2011-10-23	mound	11	131	0	3	66	38	15	1	0	0	0	0	0	0	254	0.515748	0	0.011811	0.259843	0.149606	0.0590551	0.00393701	0	0	0	0	0	0	123	0	0.0243902	0.536585	0.308943	0.121951	0.00813008	0	0	0	0	0	0		10.25	0		434.023	42.3437	0.121369
2011-10-23	mound	12	111	13	15	18	11	7	1	0	0	0	0	0	0	176	0.630682	0.0738636	0.0852273	0.102273	0.0625	0.0397727	0.00568182	0	0	0	0	0	0	65	0.2	0.230769	0.276923	0.169231	0.107692	0.0153846	0	0	0	0	0	0		5.41667	0.5	10.8333	48.8106	9.01119	0.121369
2011-10-23	mound	13	156	5	2	1	89	3	0	0	0	0	0	0	0	256	0.609375	0.0195312	0.0078125	0.00390625	0.347656	0.0117188	0	0	0	0	0	0	0	100	0.05	0.02	0.01	0.89	0.03	0	0	0	0	0	0	0		8.33333	0		647.879	77.7455	0.121369
2011-10-23	mound	14	97	1	1	38	1	4	2	0	0	0	0	0	0	144	0.673611	0.00694444	0.00694444	0.263889	0.00694444	0.0277778	0.0138889	0	0	0	0	0	0	47	0.0212766	0.0212766	0.808511	0.0212766	0.0851064	0.0425532	0	0	0	0	0	0		3.91667	0.5	7.83333	116.629	29.7776	0.121369
2011-10-23	mound	15	39	0	1	8	0	0	0	0	13	0	0	0	0	61	0.639344	0	0.0163934	0.131148	0	0	0	0	0.213115	0	0	0	0	22	0	0.0454545	0.363636	0	0	0	0	0.590909	0	0	0	0		1.83333	0		17.6061	9.60331	0.121369
2011-10-23	mound	16	101	0	0	61	3	0	4	0	0	0	0	0	0	169	0.597633	0	0	0.360947	0.0177515	0	0.0236686	0	0	0	0	0	0	68	0	0	0.897059	0.0441176	0	0.0588235	0	0	0	0	0	0		5.66667	0		305.515	53.9144	0.121369
2011-10-23	mound	17	168	3	12	6	93	0	0	0	0	0	0	0	0	282	0.595745	0.0106383	0.0425532	0.0212766	0.329787	0	0	0	0	0	0	0	0	114	0.0263158	0.105263	0.0526316	0.815789	0	0	0	0	0	0	0	0		9.5	0		705	74.2105	0.121369
2011-10-23	mound	18	153	2	0	80	21	1	0	0	0	0	0	0	0	257	0.595331	0.0077821	0	0.311284	0.0817121	0.00389105	0	0	0	0	0	0	0	104	0.0192308	0	0.769231	0.201923	0.00961538	0	0	0	0	0	0	0		8.66667	0		540.424	62.3566	0.121369
2011-10-23	mound	19	99	2	26	2	17	0	8	2	0	0	0	0	0	156	0.634615	0.0128205	0.166667	0.0128205	0.108974	0	0.0512821	0.0128205	0	0	0	0	0	57	0.0350877	0.45614	0.0350877	0.298246	0	0.140351	0.0350877	0	0	0	0	0		4.75	1	4.75	70.0227	14.7416	0.121369
2011-10-23	mound	20	108	5	10	17	13	11	1	0	0	0	0	0	0	165	0.654545	0.030303	0.0606061	0.10303	0.0787879	0.0666667	0.00606061	0	0	0	0	0	0	57	0.0877193	0.175439	0.298246	0.22807	0.192982	0.0175439	0	0	0	0	0	0		4.75	0.5	9.5	39.4773	8.311	0.121369
2011-10-23	mound	21	78	0	0	0	0	59	2	0	0	0	0	0	0	139	0.561151	0	0	0	0	0.42446	0.0143885	0	0	0	0	0	0	61	0	0	0	0	0.967213	0.0327869	0	0	0	0	0	0		5.08333	0		288.629	56.7794	0.121369
2011-10-23	mound	22	124	6	72	2	1	2	0	0	0	0	0	0	0	207	0.599034	0.0289855	0.347826	0.00966184	0.00483092	0.00966184	0	0	0	0	0	0	0	83	0.0722892	0.86747	0.0240964	0.0120482	0.0240964	0	0	0	0	0	0	0		6.91667	0		423.174	61.1818	0.121369
2011-10-23	mound	23	105	2	0	75	7	0	0	0	0	0	0	0	0	189	0.555556	0.010582	0	0.396825	0.037037	0	0	0	0	0	0	0	0	84	0.0238095	0	0.892857	0.0833333	0	0	0	0	0	0	0	0		7	0		462.727	66.1039	0.121369
2011-10-23	mound	24	131	1	0	1	82	0	4	0	0	0	0	0	0	219	0.598174	0.00456621	0	0.00456621	0.374429	0	0.0182648	0	0	0	0	0	0	88	0.0113636	0	0.0113636	0.931818	0	0.0454545	0	0	0	0	0	0		7.33333	0		554.242	75.5785	0.121369
2011-10-23	mound	25	98	0	6	71	0	4	0	0	0	0	0	0	0	179	0.547486	0	0.0335196	0.396648	0	0.0223464	0	0	0	0	0	0	0	81	0	0.0740741	0.876543	0	0.0493827	0	0	0	0	0	0	0		6.75	0		413.295	61.229	0.121369
2011-10-23	mound	26	125	1	0	7	29	54	1	2	0	0	0	0	0	219	0.570776	0.00456621	0	0.0319635	0.13242	0.246575	0.00456621	0.00913242	0	0	0	0	0	94	0.0106383	0	0.0744681	0.308511	0.574468	0.0106383	0.0212766	0	0	0	0	0		7.83333	0.5	15.6667	279.606	35.6944	0.121369
2011-10-23	mound	27	98	0	1	0	2	81	0	0	1	0	0	0	0	183	0.535519	0	0.00546448	0	0.010929	0.442623	0	0	0.00546448	0	0	0	0	85	0	0.0117647	0	0.0235294	0.952941	0	0	0.0117647	0	0	0	0		7.08333	0		542.265	76.5551	0.121369
2011-10-23	mound	28	74	0	0	40	0	0	0	0	0	0	0	0	0	114	0.649123	0	0	0.350877	0	0	0	0	0	0	0	0	0	40	0	0	1	0	0	0	0	0	0	0	0	0		3.33333	0		133.333	40	0.121369
2011-10-23	mound	29	75	0	1	53	0	0	0	0	0	0	0	0	0	129	0.581395	0	0.00775194	0.410853	0	0	0	0	0	0	0	0	0	54	0	0.0185185	0.981481	0	0	0	0	0	0	0	0	0		4.5	0		233.364	51.8586	0.121369
2011-10-23	mound	30	88	2	2	6	6	16	6	1	0	0	0	0	0	127	0.692913	0.015748	0.015748	0.0472441	0.0472441	0.125984	0.0472441	0.00787402	0	0	0	0	0	39	0.0512821	0.0512821	0.153846	0.153846	0.410256	0.153846	0.025641	0	0	0	0	0		3.25	1.5	2.16667	22.3864	6.88811	0.121369
2011-10-23	mound	31	102	1	6	12	0	0	0	0	0	0	0	0	0	121	0.842975	0.00826446	0.0495868	0.0991736	0	0	0	0	0	0	0	0	0	19	0.0526316	0.315789	0.631579	0	0	0	0	0	0	0	0	0		1.58333	0		13.7197	8.66507	0.121369
2011-10-23	mound	32	52	0	1	39	0	0	0	0	0	0	0	0	0	92	0.565217	0	0.0108696	0.423913	0	0	0	0	0	0	0	0	0	40	0	0.025	0.975	0	0	0	0	0	0	0	0	0		3.33333	0		126.242	37.8727	0.121369
2011-10-23	mound	33	82	3	0	52	4	5	2	0	0	0	0	0	0	148	0.554054	0.0202703	0	0.351351	0.027027	0.0337838	0.0135135	0	0	0	0	0	0	66	0.0454545	0	0.787879	0.0606061	0.0757576	0.030303	0	0	0	0	0	0		5.5	0		217.727	39.5868	0.121369
2011-10-23	mound	34	106	0	39	32	7	1	3	0	0	0	0	0	0	188	0.56383	0	0.207447	0.170213	0.037234	0.00531915	0.0159574	0	0	0	0	0	0	82	0	0.47561	0.390244	0.0853659	0.0121951	0.0365854	0	0	0	0	0	0		6.83333	0		185.788	27.1885	0.121369
2011-10-23	mound	35	54	0	1	51	0	0	0	0	0	0	0	0	0	106	0.509434	0	0.00943396	0.481132	0	0	0	0	0	0	0	0	0	52	0	0.0192308	0.980769	0	0	0	0	0	0	0	0	0		4.33333	0		216.061	49.8601	0.121369
2011-10-23	mound	36	93	3	0	0	25	1	0	0	0	0	0	0	0	122	0.762295	0.0245902	0	0	0.204918	0.00819672	0	0	0	0	0	0	0	29	0.103448	0	0	0.862069	0.0344828	0	0	0	0	0	0	0		2.41667	0		51.3561	21.2508	0.121369
2011-10-23	mound	37	109	3	75	11	10	2	5	1	0	0	0	0	0	216	0.50463	0.0138889	0.347222	0.0509259	0.0462963	0.00925926	0.0231481	0.00462963	0	0	0	0	0	107	0.0280374	0.700935	0.102804	0.0934579	0.0186916	0.046729	0.00934579	0	0	0	0	0		8.91667	1.5	5.94444	448.265	50.2727	0.121369
2011-10-23	mound	38	188	0	7	136	5	0	1	0	0	0	0	0	0	337	0.557864	0	0.0207715	0.403561	0.0148368	0	0.00296736	0	0	0	0	0	0	149	0	0.0469799	0.912752	0.033557	0	0.00671141	0	0	0	0	0	0		12.4167	0		1520.08	122.423	0.121369
2011-10-23	mound	39	73	0	3	7	18	17	1	5	0	0	0	0	0	124	0.58871	0	0.0241935	0.0564516	0.145161	0.137097	0.00806452	0.0403226	0	0	0	0	0	51	0	0.0588235	0.137255	0.352941	0.333333	0.0196078	0.0980392	0	0	0	0	0		4.25	0.5	8.5	43.6591	10.2727	0.121369
2011-10-23	mound	40	77	0	2	24	12	1	1	0	0	0	0	0	0	117	0.65812	0	0.017094	0.205128	0.102564	0.00854701	0.00854701	0	0	0	0	0	0	40	0	0.05	0.6	0.3	0.025	0.025	0	0	0	0	0	0		3.33333	0		53.8788	16.1636	0.121369
2011-10-23	mound	41	68	2	6	10	13	2	1	0	0	0	0	0	0	102	0.666667	0.0196078	0.0588235	0.0980392	0.127451	0.0196078	0.00980392	0	0	0	0	0	0	34	0.0588235	0.176471	0.294118	0.382353	0.0588235	0.0294118	0	0	0	0	0	0		2.83333	0.5	5.66667	19.7879	6.98396	0.121369
2011-10-23	mound	42	154	8	7	19	9	65	3	0	0	0	0	0	0	265	0.581132	0.0301887	0.0264151	0.0716981	0.0339623	0.245283	0.0113208	0	0	0	0	0	0	111	0.0720721	0.0630631	0.171171	0.0810811	0.585586	0.027027	0	0	0	0	0	0		9.25	1.5	6.16667	342.023	36.9754	0.121369
2011-10-23	mound	43	90	0	5	29	3	19	3	0	0	0	0	0	0	149	0.604027	0	0.033557	0.194631	0.0201342	0.127517	0.0201342	0	0	0	0	0	0	59	0	0.0847458	0.491525	0.0508475	0.322034	0.0508475	0	0	0	0	0	0		4.91667	0		86.8106	17.6564	0.121369
2011-10-23	mound	44	91	0	59	4	8	0	0	0	0	0	0	0	0	162	0.561728	0	0.364198	0.0246914	0.0493827	0	0	0	0	0	0	0	0	71	0	0.830986	0.056338	0.112676	0	0	0	0	0	0	0	0		5.91667	0		285.538	48.2599	0.121369
2011-10-23	mound	45	37	2	7	2	11	0	0	0	0	0	0	0	0	59	0.627119	0.0338983	0.118644	0.0338983	0.186441	0	0	0	0	0	0	0	0	22	0.0909091	0.318182	0.0909091	0.5	0	0	0	0	0	0	0	0		1.83333	0		12.5152	6.82645	0.121369
2011-10-23	mound	46	118	0	13	55	3	0	0	1	0	0	0	0	0	190	0.621053	0	0.0684211	0.289474	0.0157895	0	0	0.00526316	0	0	0	0	0	72	0	0.180556	0.763889	0.0416667	0	0	0.0138889	0	0	0	0	0		6	0		252	42	0.121369
2011-10-23	mound	47	81	3	2	1	56	1	3	0	0	0	0	0	0	147	0.55102	0.0204082	0.0136054	0.00680272	0.380952	0.00680272	0.0204082	0	0	0	0	0	0	66	0.0454545	0.030303	0.0151515	0.848485	0.0151515	0.0454545	0	0	0	0	0	0		5.5	0.5	11	254.273	46.2314	0.121369
2011-10-24	mound	1	112	0	4	6	1	52	1	0	0	0	0	0	0	176	0.636364	0	0.0227273	0.0340909	0.00568182	0.295455	0.00568182	0	0	0	0	0	0	64	0	0.0625	0.09375	0.015625	0.8125	0.015625	0	0	0	0	0	0		5.33333	0		219.697	41.1932	0.132018
2011-10-24	mound	2	136	14	7	11	15	6	3	0	0	0	0	0	0	192	0.708333	0.0729167	0.0364583	0.0572917	0.078125	0.03125	0.015625	0	0	0	0	0	0	56	0.25	0.125	0.196429	0.267857	0.107143	0.0535714	0	0	0	0	0	0		4.66667	1.5	3.11111	34.0606	7.2987	0.132018
2011-10-24	mound	3	125	0	52	2	0	0	0	7	0	0	0	0	0	186	0.672043	0	0.27957	0.0107527	0	0	0	0.0376344	0	0	0	0	0	61	0	0.852459	0.0327869	0	0	0	0.114754	0	0	0	0	0		5.08333	0		222.447	43.7601	0.132018
2011-10-24	mound	4	108	2	0	0	0	0	2	75	0	0	0	0	0	187	0.57754	0.0106952	0	0	0	0	0.0106952	0.40107	0	0	0	0	0	79	0.0253165	0	0	0	0	0.0253165	0.949367	0	0	0	0	0		6.58333	0		464.811	70.6041	0.132018
2011-10-24	mound	5	147	1	1	72	3	3	2	1	0	0	0	0	0	230	0.63913	0.00434783	0.00434783	0.313043	0.0130435	0.0130435	0.00869565	0.00434783	0	0	0	0	0	83	0.0120482	0.0120482	0.86747	0.0361446	0.0361446	0.0240964	0.0120482	0	0	0	0	0		6.91667	1	6.91667	421.356	60.9189	0.132018
2011-10-24	mound	6	194	5	3	3	3	1	8	0	0	0	0	0	0	217	0.894009	0.0230415	0.0138249	0.0138249	0.0138249	0.00460829	0.0368664	0	0	0	0	0	0	23	0.217391	0.130435	0.130435	0.130435	0.0434783	0.347826	0	0	0	0	0	0		1.91667	0.5	3.83333	6.62879	3.4585	0.132018
2011-10-24	mound	7	139	2	3	14	10	0	4	1	0	37	0	0	0	210	0.661905	0.00952381	0.0142857	0.0666667	0.047619	0	0.0190476	0.0047619	0	0.17619	0	0	0	71	0.028169	0.0422535	0.197183	0.140845	0	0.056338	0.0140845	0	0.521127	0	0	0		5.91667	1.5	3.94444	115.902	19.589	0.132018
2011-10-24	mound	8	108	0	0	0	76	0	0	1	0	0	0	0	0	185	0.583784	0	0	0	0.410811	0	0	0.00540541	0	0	0	0	0	77	0	0	0	0.987013	0	0	0.012987	0	0	0	0	0		6.41667	0		480.265	74.8465	0.132018
2011-10-24	mound	9	161	2	1	1	2	1	0	3	28	49	0	0	0	248	0.649194	0.00806452	0.00403226	0.00403226	0.00806452	0.00403226	0	0.0120968	0.112903	0.197581	0	0	0	87	0.0229885	0.0114943	0.0114943	0.0229885	0.0114943	0	0.0344828	0.321839	0.563218	0	0	0		7.25	1	7.25	234.023	32.279	0.132018
2011-10-24	mound	10	114	2	0	51	0	0	0	1	0	0	0	0	0	168	0.678571	0.0119048	0	0.303571	0	0	0	0.00595238	0	0	0	0	0	54	0.037037	0	0.944444	0	0	0	0.0185185	0	0	0	0	0		4.5	0		214.818	47.7374	0.132018
2011-10-24	mound	11	137	1	0	1	0	63	2	0	0	0	0	0	0	204	0.671569	0.00490196	0	0.00490196	0	0.308824	0.00980392	0	0	0	0	0	0	67	0.0149254	0	0.0149254	0	0.940299	0.0298507	0	0	0	0	0	0		5.58333	0		327.356	58.6309	0.132018
2011-10-24	mound	12	147	0	2	0	97	0	3	0	0	0	0	0	0	249	0.590361	0	0.00803213	0	0.389558	0	0.0120482	0	0	0	0	0	0	102	0	0.0196078	0	0.95098	0	0.0294118	0	0	0	0	0	0		8.5	0		777.727	91.4973	0.132018
2011-10-24	mound	13	167	0	91	0	1	0	3	0	0	0	0	0	0	262	0.637405	0	0.347328	0	0.00381679	0	0.0114504	0	0	0	0	0	0	95	0	0.957895	0	0.0105263	0	0.0315789	0	0	0	0	0	0		7.91667	0		685.356	86.5713	0.132018
2011-10-24	mound	14	116	57	3	5	4	8	4	0	0	0	0	0	0	197	0.588832	0.28934	0.0152284	0.0253807	0.0203046	0.0406091	0.0203046	0	0	0	0	0	0	81	0.703704	0.037037	0.0617284	0.0493827	0.0987654	0.0493827	0	0	0	0	0	0		6.75	1.5	4.5	257.477	38.1448	0.132018
2011-10-24	mound	15	137	0	2	0	87	0	2	0	0	0	0	0	0	228	0.600877	0	0.00877193	0	0.381579	0	0.00877193	0	0	0	0	0	0	91	0	0.021978	0	0.956044	0	0.021978	0	0	0	0	0	0		7.58333	0		626.083	82.5604	0.132018
2011-10-24	mound	16	209	0	1	39	92	1	3	0	0	0	0	0	0	345	0.605797	0	0.00289855	0.113043	0.266667	0.00289855	0.00869565	0	0	0	0	0	0	136	0	0.00735294	0.286765	0.676471	0.00735294	0.0220588	0	0	0	0	0	0		11.3333	0		768.606	67.8182	0.132018
2011-10-24	mound	17	199	1	0	0	15	86	0	0	0	0	0	0	0	301	0.66113	0.00332226	0	0	0.0498339	0.285714	0	0	0	0	0	0	0	102	0.00980392	0	0	0.147059	0.843137	0	0	0	0	0	0	0		8.5	0		614.091	72.246	0.132018
2011-10-24	mound	18	173	0	81	0	1	1	0	0	0	0	0	0	0	256	0.675781	0	0.316406	0	0.00390625	0.00390625	0	0	0	0	0	0	0	83	0	0.975904	0	0.0120482	0.0120482	0	0	0	0	0	0	0		6.91667	0		544.447	78.7152	0.132018
2011-10-24	mound	19	120	0	57	0	2	0	1	0	0	0	0	0	0	180	0.666667	0	0.316667	0	0.0111111	0	0.00555556	0	0	0	0	0	0	60	0	0.95	0	0.0333333	0	0.0166667	0	0	0	0	0	0		5	0		268.545	53.7091	0.132018
2011-10-24	mound	20	132	0	87	0	0	0	6	0	0	1	0	0	0	226	0.584071	0	0.384956	0	0	0	0.0265487	0	0	0.00442478	0	0	0	94	0	0.925532	0	0	0	0.0638298	0	0	0.0106383	0	0	0		7.83333	0		624.515	79.7253	0.132018
2011-10-24	mound	21	256	61	2	3	4	59	2	0	0	0	0	0	0	387	0.661499	0.157623	0.00516796	0.00775194	0.0103359	0.152455	0.00516796	0	0	0	0	0	0	131	0.465649	0.0152672	0.0229008	0.0305344	0.450382	0.0152672	0	0	0	0	0	0		10.9167	1	10.9167	527.72	48.3407	0.132018
2011-10-24	mound	22	125	0	72	7	2	0	2	0	0	0	0	0	0	208	0.600962	0	0.346154	0.0336538	0.00961538	0	0.00961538	0	0	0	0	0	0	83	0	0.86747	0.0843373	0.0240964	0	0.0240964	0	0	0	0	0	0		6.91667	0		424.265	61.3395	0.132018
2011-10-24	mound	23	131	2	2	78	1	0	0	0	1	0	0	0	0	215	0.609302	0.00930233	0.00930233	0.362791	0.00465116	0	0	0	0.00465116	0	0	0	0	84	0.0238095	0.0238095	0.928571	0.0119048	0	0	0	0.0119048	0	0	0	0		7	0		500.545	71.5065	0.132018
2011-10-24	mound	24	146	54	0	4	0	0	1	0	0	0	0	0	0	205	0.712195	0.263415	0	0.0195122	0	0	0.00487805	0	0	0	0	0	0	59	0.915254	0	0.0677966	0	0	0.0169492	0	0	0	0	0	0		4.91667	0		240.265	48.8675	0.132018
2011-10-24	mound	25	74	0	0	0	2	0	0	0	0	33	0	0	0	109	0.678899	0	0	0	0.0183486	0	0	0	0	0.302752	0	0	0	35	0	0	0	0.0571429	0	0	0	0	0.942857	0	0	0		2.91667	0		90.0833	30.8857	0.132018
2011-10-24	mound	26	167	1	0	2	2	78	4	0	0	0	0	0	0	254	0.65748	0.00393701	0	0.00787402	0.00787402	0.307087	0.015748	0	0	0	0	0	0	87	0.0114943	0	0.0229885	0.0229885	0.896552	0.045977	0	0	0	0	0	0		7.25	0		498.023	68.6928	0.132018
2011-10-24	mound	27	147	50	26	3	2	1	7	2	0	0	0	0	0	238	0.617647	0.210084	0.109244	0.012605	0.00840336	0.00420168	0.0294118	0.00840336	0	0	0	0	0	91	0.549451	0.285714	0.032967	0.021978	0.010989	0.0769231	0.021978	0	0	0	0	0		7.58333	1.5	5.05556	232.083	30.6044	0.132018
2011-10-24	mound	28	146	5	18	53	7	4	2	0	0	0	0	0	0	235	0.621277	0.0212766	0.0765957	0.225532	0.0297872	0.0170213	0.00851064	0	0	0	0	0	0	89	0.0561798	0.202247	0.595506	0.0786517	0.0449438	0.0224719	0	0	0	0	0	0		7.41667	1	7.41667	233.356	31.4637	0.132018
2011-10-24	mound	29	103	0	0	44	0	0	3	1	0	0	0	0	0	151	0.682119	0	0	0.291391	0	0	0.0198675	0.00662252	0	0	0	0	0	48	0	0	0.916667	0	0	0.0625	0.0208333	0	0	0	0	0		4	0		159.455	39.8636	0.132018
2011-10-24	mound	30	143	1	81	4	3	0	0	3	0	0	0	0	0	235	0.608511	0.00425532	0.344681	0.0170213	0.012766	0	0	0.012766	0	0	0	0	0	92	0.0108696	0.880435	0.0434783	0.0326087	0	0	0.0326087	0	0	0	0	0		7.66667	0		535.515	69.8498	0.132018
2011-10-24	mound	31	138	0	0	2	27	43	2	0	0	0	0	0	0	212	0.650943	0	0	0.00943396	0.127358	0.20283	0.00943396	0	0	0	0	0	0	74	0	0	0.027027	0.364865	0.581081	0.027027	0	0	0	0	0	0		6.16667	0		193.606	31.3956	0.132018
2011-10-24	mound	32	129	2	13	1	47	0	2	0	0	0	0	2	0	196	0.658163	0.0102041	0.0663265	0.00510204	0.239796	0	0.0102041	0	0	0	0	0.0102041	0	67	0.0298507	0.19403	0.0149254	0.701493	0	0.0298507	0	0	0	0	0.0298507	0		5.58333	0.5	11.1667	183.356	32.8399	0.132018
2011-10-24	mound	33	117	3	0	0	60	0	4	0	0	0	0	0	0	184	0.63587	0.0163043	0	0	0.326087	0	0.0217391	0	0	0	0	0	0	67	0.0447761	0	0	0.895522	0	0.0597015	0	0	0	0	0	0		5.58333	0		295.538	52.9322	0.132018
2011-10-24	mound	34	128	0	0	72	0	0	1	0	0	0	0	0	0	201	0.636816	0	0	0.358209	0	0	0.00497512	0	0	0	0	0	0	73	0	0	0.986301	0	0	0.0136986	0	0	0	0	0	0		6.08333	0		430.992	70.8481	0.132018
2011-10-24	mound	35	118	0	3	66	2	2	4	0	0	0	0	0	0	195	0.605128	0	0.0153846	0.338462	0.0102564	0.0102564	0.0205128	0	0	0	0	0	0	77	0	0.038961	0.857143	0.025974	0.025974	0.0519481	0	0	0	0	0	0		6.41667	0		354.083	55.1818	0.132018
2011-10-24	mound	36	129	0	0	11	9	26	14	30	0	0	0	0	0	219	0.589041	0	0	0.0502283	0.0410959	0.118721	0.0639269	0.136986	0	0	0	0	0	90	0	0	0.122222	0.1	0.288889	0.155556	0.333333	0	0	0	0	0		7.5	0		118.091	15.7455	0.132018
2011-10-24	mound	37	103	0	1	55	0	0	0	0	0	0	0	0	0	159	0.647799	0	0.00628931	0.345912	0	0	0	0	0	0	0	0	0	56	0	0.0178571	0.982143	0	0	0	0	0	0	0	0	0		4.66667	0		251.333	53.8571	0.132018
2011-10-24	mound	38	123	0	0	87	1	0	1	0	0	0	0	0	0	212	0.580189	0	0	0.410377	0.00471698	0	0.00471698	0	0	0	0	0	0	89	0	0	0.977528	0.011236	0	0.011236	0	0	0	0	0	0		7.41667	0		628.265	84.7099	0.132018
2011-10-24	mound	39	145	15	47	6	4	0	5	0	0	0	0	0	0	222	0.653153	0.0675676	0.211712	0.027027	0.018018	0	0.0225225	0	0	0	0	0	0	77	0.194805	0.61039	0.0779221	0.0519481	0	0.0649351	0	0	0	0	0	0		6.41667	0		183.356	28.575	0.132018
2011-10-24	mound	40	102	1	0	0	2	0	3	83	0	0	0	0	0	191	0.534031	0.0052356	0	0	0.0104712	0	0.0157068	0.434555	0	0	0	0	0	89	0.011236	0	0	0.0224719	0	0.0337079	0.932584	0	0	0	0	0		7.41667	0		567.538	76.522	0.132018
2011-10-24	mound	41	42	0	0	2	0	0	1	27	0	0	0	0	0	72	0.583333	0	0	0.0277778	0	0	0.0138889	0.375	0	0	0	0	0	30	0	0	0.0666667	0	0	0.0333333	0.9	0	0	0	0	0		2.5	0		59.9091	23.9636	0.132018
2011-10-24	mound	42	149	1	0	2	0	0	1	0	0	0	0	0	0	153	0.973856	0.00653595	0	0.0130719	0	0	0.00653595	0	0	0	0	0	0	4	0.25	0	0.5	0	0	0.25	0	0	0	0	0	0		0.333333	0		0.424242	1.27273	0.132018
2011-10-24	mound	43	287	137	0	3	5	0	0	0	0	0	0	0	0	432	0.664352	0.31713	0	0.00694444	0.0115741	0	0	0	0	0	0	0	0	145	0.944828	0	0.0206897	0.0344828	0	0	0	0	0	0	0	0		12.0833	0		1550.08	128.283	0.132018
2011-10-24	mound	44	114	0	5	12	63	1	2	0	0	0	0	0	0	197	0.57868	0	0.0253807	0.0609137	0.319797	0.00507614	0.0101523	0	0	0	0	0	0	83	0	0.060241	0.144578	0.759036	0.0120482	0.0240964	0	0	0	0	0	0		6.91667	0		324.447	46.908	0.132018
2011-10-24	mound	45	133	0	0	3	47	8	6	1	0	0	0	0	0	198	0.671717	0	0	0.0151515	0.237374	0.040404	0.030303	0.00505051	0	0	0	0	0	65	0	0	0.0461538	0.723077	0.123077	0.0923077	0.0153846	0	0	0	0	0		5.41667	0		178.811	33.0112	0.132018
2011-10-24	mound	46	155	2	1	96	0	0	2	1	0	0	0	0	0	257	0.603113	0.0077821	0.00389105	0.373541	0	0	0.0077821	0.00389105	0	0	0	0	0	102	0.0196078	0.00980392	0.941176	0	0	0.0196078	0.00980392	0	0	0	0	0		8.5	0		759.909	89.4011	0.132018
2011-10-24	mound	47	160	0	0	1	84	0	0	0	0	0	0	0	0	245	0.653061	0	0	0.00408163	0.342857	0	0	0	0	0	0	0	0	85	0	0	0.0117647	0.988235	0	0	0	0	0	0	0	0		7.08333	0		586.811	82.8439	0.132018
2011-10-24	mound	48	221	1	0	0	138	0	0	0	0	0	0	0	0	360	0.613889	0.00277778	0	0	0.383333	0	0	0	0	0	0	0	0	139	0.00719424	0	0	0.992806	0	0	0	0	0	0	0	0		11.5833	0		1584.99	136.834	0.132018
2011-10-25	mound	1	105	4	0	9	61	0	5	0	1	0	0	0	0	185	0.567568	0.0216216	0	0.0486486	0.32973	0	0.027027	0	0.00540541	0	0	0	0	80	0.05	0	0.1125	0.7625	0	0.0625	0	0.0125	0	0	0	0		6.66667	0		300.97	45.1455	0.124344
2011-10-25	mound	2	203	0	6	63	11	42	26	1	1	0	1	0	0	354	0.573446	0	0.0169492	0.177966	0.0310734	0.118644	0.0734463	0.00282486	0.00282486	0	0.00282486	0	0	151	0	0.0397351	0.417219	0.0728477	0.278146	0.172185	0.00662252	0.00662252	0	0.00662252	0	0		12.5833	1	12.5833	424.447	33.7309	0.124344
2011-10-25	mound	3	105	0	2	0	77	0	2	0	0	0	0	0	0	186	0.564516	0	0.0107527	0	0.413978	0	0.0107527	0	0	0	0	0	0	81	0	0.0246914	0	0.950617	0	0.0246914	0	0	0	0	0	0		6.75	0		490.023	72.596	0.124344
2011-10-25	mound	4	117	2	0	0	4	0	3	75	0	0	0	0	0	201	0.58209	0.00995025	0	0	0.0199005	0	0.0149254	0.373134	0	0	0	0	0	84	0.0238095	0	0	0.047619	0	0.0357143	0.892857	0	0	0	0	0		7	0		460.545	65.7922	0.124344
2011-10-25	mound	5	186	4	1	56	2	0	0	0	0	0	0	0	0	249	0.746988	0.0160643	0.00401606	0.2249	0.00803213	0	0	0	0	0	0	0	0	63	0.0634921	0.015873	0.888889	0.031746	0	0	0	0	0	0	0	0		5.25	0		256.932	48.9394	0.124344
2011-10-25	mound	6	128	1	1	1	72	0	0	0	0	0	0	0	0	203	0.630542	0.00492611	0.00492611	0.00492611	0.35468	0	0	0	0	0	0	0	0	75	0.0133333	0.0133333	0.0133333	0.96	0	0	0	0	0	0	0	0		6.25	0		428.932	68.6291	0.124344
2011-10-25	mound	7	158	80	0	0	2	0	2	0	0	0	0	0	0	242	0.652893	0.330579	0	0	0.00826446	0	0.00826446	0	0	0	0	0	0	84	0.952381	0	0	0.0238095	0	0.0238095	0	0	0	0	0	0		7	0		529.091	75.5844	0.124344
2011-10-25	mound	8	181	1	0	107	3	0	5	0	0	0	0	0	0	297	0.609428	0.003367	0	0.360269	0.010101	0	0.016835	0	0	0	0	0	0	116	0.00862069	0	0.922414	0.0258621	0	0.0431034	0	0	0	0	0	0		9.66667	0		942.061	97.4545	0.124344
2011-10-25	mound	9	101	0	1	42	3	0	1	0	0	0	2	0	0	150	0.673333	0	0.00666667	0.28	0.02	0	0.00666667	0	0	0	0.0133333	0	0	49	0	0.0204082	0.857143	0.0612245	0	0.0204082	0	0	0	0.0408163	0	0		4.08333	0		143.538	35.1521	0.124344
2011-10-25	mound	10	96	4	2	9	3	4	4	0	0	1	55	0	0	178	0.539326	0.0224719	0.011236	0.0505618	0.0168539	0.0224719	0.0224719	0	0	0.00561798	0.308989	0	0	82	0.0487805	0.0243902	0.109756	0.0365854	0.0487805	0.0487805	0	0	0.0121951	0.670732	0	0		6.83333	2.5	2.73333	237.061	34.6918	0.124344
2011-10-25	mound	11	71	8	7	17	1	0	5	0	0	0	0	0	0	109	0.651376	0.0733945	0.0642202	0.155963	0.00917431	0	0.0458716	0	0	0	0	0	0	38	0.210526	0.184211	0.447368	0.0263158	0	0.131579	0	0	0	0	0	0		3.16667	0		27.9697	8.83254	0.124344
2011-10-25	mound	12	151	76	4	0	0	0	5	0	0	0	0	1	0	237	0.637131	0.320675	0.0168776	0	0	0	0.021097	0	0	0	0	0.00421941	0	86	0.883721	0.0465116	0	0	0	0.0581395	0	0	0	0	0.0116279	0		7.16667	0		472.879	65.9831	0.124344
2011-10-25	mound	13	138	1	59	0	0	0	0	0	0	0	0	0	0	198	0.69697	0.00505051	0.29798	0	0	0	0	0	0	0	0	0	0	60	0.0166667	0.983333	0	0	0	0	0	0	0	0	0	0		5	0		289.273	57.8545	0.124344
2011-10-25	mound	14	125	0	2	11	23	18	9	6	3	2	6	0	0	205	0.609756	0	0.0097561	0.0536585	0.112195	0.0878049	0.0439024	0.0292683	0.0146341	0.0097561	0.0292683	0	0	80	0	0.025	0.1375	0.2875	0.225	0.1125	0.075	0.0375	0.025	0.075	0	0		6.66667	4.5	1.48148	55.5152	8.32727	0.124344
2011-10-25	mound	15	124	0	32	3	33	0	3	0	0	0	1	0	0	196	0.632653	0	0.163265	0.0153061	0.168367	0	0.0153061	0	0	0	0.00510204	0	0	72	0	0.444444	0.0416667	0.458333	0	0.0416667	0	0	0	0.0138889	0	0		6	0		154.545	25.7576	0.124344
2011-10-25	mound	16	54	5	0	7	3	0	0	0	0	8	5	0	0	82	0.658537	0.0609756	0	0.0853659	0.0365854	0	0	0	0	0.097561	0.0609756	0	0	28	0.178571	0	0.25	0.107143	0	0	0	0	0.285714	0.178571	0	0		2.33333	0		9.69697	4.15584	0.124344
2011-10-25	mound	17	135	0	0	70	0	0	0	0	0	0	0	0	0	205	0.658537	0	0	0.341463	0	0	0	0	0	0	0	0	0	70	0	0	1	0	0	0	0	0	0	0	0	0		5.83333	0		408.333	70	0.124344
2011-10-25	mound	18	199	135	0	0	0	0	1	0	0	0	0	0	0	335	0.59403	0.402985	0	0	0	0	0.00298507	0	0	0	0	0	0	136	0.992647	0	0	0	0	0.00735294	0	0	0	0	0	0		11.3333	0		1516.79	133.834	0.124344
2011-10-25	mound	19	152	1	2	0	78	0	2	1	0	0	0	0	0	236	0.644068	0.00423729	0.00847458	0	0.330508	0	0.00847458	0.00423729	0	0	0	0	0	84	0.0119048	0.0238095	0	0.928571	0	0.0238095	0.0119048	0	0	0	0	0		7	0		500.545	71.5065	0.124344
2011-10-25	mound	20	86	2	1	0	43	0	2	0	0	0	0	0	0	134	0.641791	0.0149254	0.00746269	0	0.320896	0	0.0149254	0	0	0	0	0	0	48	0.0416667	0.0208333	0	0.895833	0	0.0416667	0	0	0	0	0	0		4	0		151.455	37.8636	0.124344
2011-10-25	mound	21	144	1	0	94	0	0	2	0	0	0	0	0	0	241	0.59751	0.00414938	0	0.390041	0	0	0.00829876	0	0	0	0	0	0	97	0.0103093	0	0.969072	0	0	0.0206186	0	0	0	0	0	0		8.08333	0		732.447	90.612	0.124344
2011-10-25	mound	22	160	101	0	0	1	0	2	0	0	0	0	0	0	264	0.606061	0.382576	0	0	0.00378788	0	0.00757576	0	0	0	0	0	0	104	0.971154	0	0	0.00961538	0	0.0192308	0	0	0	0	0	0		8.66667	0		845.879	97.6014	0.124344
2011-10-25	mound	23	113	3	24	13	7	9	8	0	0	0	6	0	0	183	0.617486	0.0163934	0.131148	0.0710383	0.0382514	0.0491803	0.0437158	0	0	0	0.0327869	0	0	70	0.0428571	0.342857	0.185714	0.1	0.128571	0.114286	0	0	0	0.0857143	0	0		5.83333	4.5	1.2963	52.3333	8.97143	0.124344
2011-10-25	mound	24	108	0	0	0	0	0	0	0	10	31	2	0	0	151	0.715232	0	0	0	0	0	0	0	0.0662252	0.205298	0.013245	0	0	43	0	0	0	0	0	0	0	0.232558	0.72093	0.0465116	0	0		3.58333	0		82.8106	23.1099	0.124344
2011-10-25	mound	25	137	13	14	12	18	10	4	0	2	7	4	1	0	222	0.617117	0.0585586	0.0630631	0.0540541	0.0810811	0.045045	0.018018	0	0.00900901	0.0315315	0.018018	0.0045045	0	85	0.152941	0.164706	0.141176	0.211765	0.117647	0.0470588	0	0.0235294	0.0823529	0.0470588	0.0117647	0		7.08333	5.5	1.28788	37.9015	5.3508	0.124344
2011-10-25	mound	26	220	1	2	37	119	0	8	0	0	0	6	0	0	393	0.559796	0.00254453	0.00508906	0.0941476	0.302799	0	0.0203562	0	0	0	0.0152672	0	0	173	0.00578035	0.0115607	0.213873	0.687861	0	0.0462428	0	0	0	0.0346821	0	0		14.4167	0.5	28.8333	1194.63	82.8644	0.124344
2011-10-25	mound	27	121	6	4	3	1	0	4	0	0	0	112	0	0	251	0.482072	0.0239044	0.0159363	0.0119522	0.00398406	0	0.0159363	0	0	0	0.446215	0	0	130	0.0461538	0.0307692	0.0230769	0.00769231	0	0.0307692	0	0	0	0.861538	0	0		10.8333	0.5	21.6667	1019.42	94.1007	0.124344
2011-10-25	mound	28	119	3	7	1	56	0	4	1	1	0	0	0	0	192	0.619792	0.015625	0.0364583	0.00520833	0.291667	0	0.0208333	0.00520833	0.00520833	0	0	0	0	73	0.0410959	0.0958904	0.0136986	0.767123	0	0.0547945	0.0136986	0.0136986	0	0	0	0		6.08333	1	6.08333	251.72	41.3786	0.124344
2011-10-25	mound	29	181	23	62	0	0	0	0	2	0	0	0	0	0	268	0.675373	0.0858209	0.231343	0	0	0	0	0.00746269	0	0	0	0	0	87	0.264368	0.712644	0	0	0	0	0.0229885	0	0	0	0	0		7.25	0		340.568	46.9749	0.124344
2011-10-25	mound	30	187	5	5	1	90	0	4	0	1	0	0	0	0	293	0.638225	0.0170648	0.0170648	0.00341297	0.307167	0	0.0136519	0	0.00341297	0	0	0	0	106	0.0471698	0.0471698	0.00943396	0.849057	0	0.0377358	0	0.00943396	0	0	0	0		8.83333	0.5	17.6667	657.424	74.4254	0.124344
2011-10-25	mound	31	149	12	63	0	0	0	0	0	0	0	0	0	0	224	0.665179	0.0535714	0.28125	0	0	0	0	0	0	0	0	0	0	75	0.16	0.84	0	0	0	0	0	0	0	0	0	0		6.25	0		331.295	53.0073	0.124344
2011-10-25	mound	32	137	59	0	3	2	0	0	0	0	0	0	0	0	201	0.681592	0.293532	0	0.0149254	0.00995025	0	0	0	0	0	0	0	0	64	0.921875	0	0.046875	0.03125	0	0	0	0	0	0	0	0		5.33333	0		286.606	53.7386	0.124344
2011-10-25	mound	33	99	1	6	1	57	0	3	0	0	0	0	0	0	167	0.592814	0.00598802	0.0359281	0.00598802	0.341317	0	0.0179641	0	0	0	0	0	0	68	0.0147059	0.0882353	0.0147059	0.838235	0	0.0441176	0	0	0	0	0	0		5.66667	0		264.606	46.6952	0.124344
2011-10-25	mound	34	135	0	3	10	59	0	3	3	0	0	0	0	0	213	0.633803	0	0.0140845	0.0469484	0.276995	0	0.0140845	0.0140845	0	0	0	0	0	78	0	0.0384615	0.128205	0.75641	0	0.0384615	0.0384615	0	0	0	0	0		6.5	0		281.909	43.3706	0.124344
2011-10-25	mound	35	111	1	3	3	62	1	4	0	0	0	0	0	0	185	0.6	0.00540541	0.0162162	0.0162162	0.335135	0.00540541	0.0216216	0	0	0	0	0	0	74	0.0135135	0.0405405	0.0405405	0.837838	0.0135135	0.0540541	0	0	0	0	0	0		6.16667	0.5	12.3333	311.242	50.4717	0.124344
2011-10-25	mound	36	129	0	9	0	81	0	0	0	0	0	0	0	0	219	0.589041	0	0.0410959	0	0.369863	0	0	0	0	0	0	0	0	90	0	0.1	0	0.9	0	0	0	0	0	0	0	0		7.5	0		542.455	72.3273	0.124344
2011-10-25	mound	37	185	0	0	2	110	0	3	1	0	0	0	0	0	301	0.614618	0	0	0.00664452	0.365449	0	0.00996678	0.00332226	0	0	0	0	0	116	0	0	0.0172414	0.948276	0	0.0258621	0.00862069	0	0	0	0	0		9.66667	0		999.333	103.379	0.124344
2011-10-25	mound	38	124	0	0	0	64	0	3	0	0	0	0	0	0	191	0.649215	0	0	0	0.335079	0	0.0157068	0	0	0	0	0	0	67	0	0	0	0.955224	0	0.0447761	0	0	0	0	0	0		5.58333	0		339.174	60.7476	0.124344
2011-10-25	mound	39	92	1	3	31	24	0	0	0	0	0	2	0	0	153	0.601307	0.00653595	0.0196078	0.202614	0.156863	0	0	0	0	0	0.0130719	0	0	61	0.0163934	0.0491803	0.508197	0.393443	0	0	0	0	0	0.0327869	0	0		5.08333	0		112.811	22.1923	0.124344
2011-10-25	mound	40	86	4	3	2	13	5	2	3	9	1	0	0	0	128	0.671875	0.03125	0.0234375	0.015625	0.101562	0.0390625	0.015625	0.0234375	0.0703125	0.0078125	0	0	0	42	0.0952381	0.0714286	0.047619	0.309524	0.119048	0.047619	0.0714286	0.214286	0.0238095	0	0	0		3.5	2.5	1.4	15.5455	4.44156	0.124344
2011-10-25	mound	41	140	3	2	3	69	1	5	0	0	0	0	0	0	223	0.627803	0.0134529	0.00896861	0.0134529	0.309417	0.0044843	0.0224215	0	0	0	0	0	0	83	0.0361446	0.0240964	0.0361446	0.831325	0.0120482	0.060241	0	0	0	0	0	0		6.91667	0.5	13.8333	384.992	55.6616	0.124344
2011-10-25	mound	42	124	3	1	11	1	1	4	37	2	1	28	0	0	213	0.58216	0.0140845	0.00469484	0.0516432	0.00469484	0.00469484	0.0187793	0.173709	0.00938967	0.00469484	0.131455	0	0	89	0.0337079	0.011236	0.123596	0.011236	0.011236	0.0449438	0.41573	0.0224719	0.011236	0.314607	0	0		7.41667	1.5	4.94444	149.72	20.1869	0.124344
2011-10-25	mound	43	108	4	13	20	22	3	3	6	1	0	0	0	0	180	0.6	0.0222222	0.0722222	0.111111	0.122222	0.0166667	0.0166667	0.0333333	0.00555556	0	0	0	0	72	0.0555556	0.180556	0.277778	0.305556	0.0416667	0.0416667	0.0833333	0.0138889	0	0	0	0		6	3	2	62.9091	10.4848	0.124344
2011-10-25	mound	44	130	53	3	3	5	2	5	3	0	0	0	0	0	204	0.637255	0.259804	0.0147059	0.0147059	0.0245098	0.00980392	0.0245098	0.0147059	0	0	0	0	0	74	0.716216	0.0405405	0.0405405	0.0675676	0.027027	0.0675676	0.0405405	0	0	0	0	0		6.16667	2.5	2.46667	221.242	35.8771	0.124344
2011-10-25	mound	45	168	0	0	0	116	0	3	0	0	0	0	0	0	287	0.585366	0	0	0	0.404181	0	0.010453	0	0	0	0	0	0	119	0	0	0	0.97479	0	0.0252101	0	0	0	0	0	0		9.91667	0		1116.81	112.62	0.124344
2011-10-25	mound	46	74	1	0	0	0	0	0	2	19	15	0	0	0	111	0.666667	0.00900901	0	0	0	0	0	0.018018	0.171171	0.135135	0	0	0	37	0.027027	0	0	0	0	0	0.0540541	0.513514	0.405405	0	0	0		3.08333	0		43.3561	14.0614	0.124344
2011-10-25	mound	47	102	2	2	0	7	42	3	1	1	0	2	0	0	162	0.62963	0.0123457	0.0123457	0	0.0432099	0.259259	0.0185185	0.00617284	0.00617284	0	0.0123457	0	0	60	0.0333333	0.0333333	0	0.116667	0.7	0.05	0.0166667	0.0166667	0	0.0333333	0	0		5	1.5	3.33333	139.636	27.9273	0.124344
2011-10-25	mound	48	149	1	1	0	1	0	1	99	0	0	0	0	0	252	0.59127	0.00396825	0.00396825	0	0.00396825	0	0.00396825	0.392857	0	0	0	0	0	103	0.00970874	0.00970874	0	0.00970874	0	0.00970874	0.961165	0	0	0	0	0		8.58333	0		810.992	94.4846	0.124344
2011-10-26	mound	1	73	2	8	15	12	6	3	0	0	0	8	2	0	129	0.565891	0.0155039	0.0620155	0.116279	0.0930233	0.0465116	0.0232558	0	0	0	0.0620155	0.0155039	0	56	0.0357143	0.142857	0.267857	0.214286	0.107143	0.0535714	0	0	0	0.142857	0.0357143	0		4.66667	2.5	1.86667	26.2424	5.62338	0.150223
2011-10-26	mound	2	84	0	42	1	2	0	1	0	0	1	0	0	0	131	0.641221	0	0.320611	0.00763359	0.0152672	0	0.00763359	0	0	0.00763359	0	0	0	47	0	0.893617	0.0212766	0.0425532	0	0.0212766	0	0	0.0212766	0	0	0		3.91667	0		144.265	36.8337	0.150223
2011-10-26	mound	3	106	1	20	2	20	10	6	0	1	0	0	1	0	167	0.634731	0.00598802	0.11976	0.011976	0.11976	0.0598802	0.0359281	0	0.00598802	0	0	0.00598802	0	61	0.0163934	0.327869	0.0327869	0.327869	0.163934	0.0983607	0	0.0163934	0	0	0.0163934	0		5.08333	1	5.08333	57.5379	11.3189	0.150223
2011-10-26	mound	4	59	0	0	0	0	0	0	0	4	26	0	1	0	90	0.655556	0	0	0	0	0	0	0	0.0444444	0.288889	0	0.0111111	0	31	0	0	0	0	0	0	0	0.129032	0.83871	0	0.0322581	0		2.58333	0		55.7197	21.5689	0.150223
2011-10-26	mound	5	80	0	0	3	2	47	4	2	0	1	0	0	0	139	0.57554	0	0	0.0215827	0.0143885	0.338129	0.028777	0.0143885	0	0.00719424	0	0	0	59	0	0	0.0508475	0.0338983	0.79661	0.0677966	0.0338983	0	0.0169492	0	0	0		4.91667	0.5	9.83333	177.538	36.1094	0.150223
2011-10-26	mound	6	100	2	29	3	8	6	1	1	0	0	0	0	0	150	0.666667	0.0133333	0.193333	0.02	0.0533333	0.04	0.00666667	0.00666667	0	0	0	0	0	50	0.04	0.58	0.06	0.16	0.12	0.02	0.02	0	0	0	0	0		4.16667	1	4.16667	67.9697	16.3127	0.150223
2011-10-26	mound	7	72	1	1	1	2	48	0	0	0	0	1	0	0	126	0.571429	0.00793651	0.00793651	0.00793651	0.015873	0.380952	0	0	0	0	0.00793651	0	0	54	0.0185185	0.0185185	0.0185185	0.037037	0.888889	0	0	0	0	0.0185185	0	0		4.5	0.5	9	188.091	41.798	0.150223
2011-10-26	mound	8	77	0	2	0	2	0	61	0	0	0	0	0	0	142	0.542254	0	0.0140845	0	0.0140845	0	0.429577	0	0	0	0	0	0	65	0	0.0307692	0	0.0307692	0	0.938462	0	0	0	0	0	0		5.41667	0		306.992	56.6755	0.150223
2011-10-26	mound	9	93	1	2	55	0	0	0	1	0	0	0	0	0	152	0.611842	0.00657895	0.0131579	0.361842	0	0	0	0.00657895	0	0	0	0	0	59	0.0169492	0.0338983	0.932203	0	0	0	0.0169492	0	0	0	0	0		4.91667	0		249.174	50.6795	0.150223
2011-10-26	mound	10	113	0	0	0	2	1	4	0	0	0	0	0	0	120	0.941667	0	0	0	0.0166667	0.00833333	0.0333333	0	0	0	0	0	0	7	0	0	0	0.285714	0.142857	0.571429	0	0	0	0	0	0		0.583333	0		1.53788	2.63636	0.150223
2011-10-26	mound	11	56	2	0	1	1	1	0	0	0	0	26	5	0	92	0.608696	0.0217391	0	0.0108696	0.0108696	0.0108696	0	0	0	0	0.282609	0.0543478	0	36	0.0555556	0	0.0277778	0.0277778	0.0277778	0	0	0	0	0.722222	0.138889	0		3	0.5	6	54.5455	18.1818	0.150223
2011-10-26	mound	12	110	55	2	10	1	0	0	0	0	1	0	0	0	179	0.614525	0.307263	0.0111732	0.0558659	0.00558659	0	0	0	0	0.00558659	0	0	0	69	0.797101	0.0289855	0.144928	0.0144928	0	0	0	0	0.0144928	0	0	0		5.75	0		248.568	43.2292	0.150223
2011-10-26	mound	13	58	32	0	2	2	1	0	0	6	0	0	0	0	101	0.574257	0.316832	0	0.019802	0.019802	0.00990099	0	0	0.0594059	0	0	0	0	43	0.744186	0	0.0465116	0.0465116	0.0232558	0	0	0.139535	0	0	0	0		3.58333	0		83.1742	23.2114	0.150223
2011-10-26	mound	14	62	0	45	0	0	0	0	0	0	0	0	0	0	107	0.579439	0	0.420561	0	0	0	0	0	0	0	0	0	0	45	0	1	0	0	0	0	0	0	0	0	0	0		3.75	0		168.75	45	0.150223
2011-10-26	mound	15	93	1	47	5	6	4	3	0	0	0	0	0	0	159	0.584906	0.00628931	0.295597	0.0314465	0.0377358	0.0251572	0.0188679	0	0	0	0	0	0	66	0.0151515	0.712121	0.0757576	0.0909091	0.0606061	0.0454545	0	0	0	0	0	0		5.5	0.5	11	175.727	31.9504	0.150223
2011-10-26	mound	16	98	1	15	8	54	2	2	0	0	8	3	5	0	196	0.5	0.00510204	0.0765306	0.0408163	0.27551	0.0102041	0.0102041	0	0	0.0408163	0.0153061	0.0255102	0	98	0.0102041	0.153061	0.0816327	0.55102	0.0204082	0.0204082	0	0	0.0816327	0.0306122	0.0510204	0		8.16667	2.5	3.26667	228.333	27.9592	0.150223
2011-10-26	mound	17	83	1	0	2	50	0	2	0	1	0	0	0	0	139	0.597122	0.00719424	0	0.0143885	0.359712	0	0.0143885	0	0.00719424	0	0	0	0	56	0.0178571	0	0.0357143	0.892857	0	0.0357143	0	0.0178571	0	0	0	0		4.66667	0		204.424	43.8052	0.150223
2011-10-26	mound	18	87	3	13	11	13	0	1	0	7	5	2	0	0	142	0.612676	0.0211268	0.0915493	0.0774648	0.0915493	0	0.00704225	0	0.0492958	0.0352113	0.0140845	0	0	55	0.0545455	0.236364	0.2	0.236364	0	0.0181818	0	0.127273	0.0909091	0.0363636	0	0		4.58333	2.5	1.83333	26.8106	5.84959	0.150223
2011-10-26	mound	19	138	1	1	0	1	1	1	0	0	0	1	0	0	144	0.958333	0.00694444	0.00694444	0	0.00694444	0.00694444	0.00694444	0	0	0	0.00694444	0	0	6	0.166667	0.166667	0	0.166667	0.166667	0.166667	0	0	0	0.166667	0	0		0.5	0.5	1	0.272727	0.545455	0.150223
2011-10-26	mound	20	143	4	4	8	9	28	5	64	0	1	0	0	0	266	0.537594	0.0150376	0.0150376	0.0300752	0.0338346	0.105263	0.018797	0.240602	0	0.0037594	0	0	0	123	0.0325203	0.0325203	0.0650407	0.0731707	0.227642	0.0406504	0.520325	0	0.00813008	0	0	0		10.25	4	2.5625	347.477	33.9002	0.150223
2011-10-26	mound	21	93	6	9	9	11	5	1	4	2	0	4	2	0	146	0.636986	0.0410959	0.0616438	0.0616438	0.0753425	0.0342466	0.00684932	0.0273973	0.0136986	0	0.0273973	0.0136986	0	53	0.113208	0.169811	0.169811	0.207547	0.0943396	0.0188679	0.0754717	0.0377358	0	0.0754717	0.0377358	0		4.41667	4	1.10417	13.7197	3.10635	0.150223
2011-10-26	mound	22	58	0	1	1	3	0	0	0	0	0	0	0	0	63	0.920635	0	0.015873	0.015873	0.047619	0	0	0	0	0	0	0	0	5	0	0.2	0.2	0.6	0	0	0	0	0	0	0	0		0.416667	0		0.810606	1.94545	0.150223
2011-10-26	mound	23	93	2	8	0	64	1	0	1	0	0	0	0	0	169	0.550296	0.0118343	0.0473373	0	0.378698	0.00591716	0	0.00591716	0	0	0	0	0	76	0.0263158	0.105263	0	0.842105	0.0131579	0	0.0131579	0	0	0	0	0		6.33333	0		334.97	52.89	0.150223
2011-10-26	mound	24	88	0	16	9	17	8	1	0	1	0	0	0	0	140	0.628571	0	0.114286	0.0642857	0.121429	0.0571429	0.00714286	0	0.00714286	0	0	0	0	52	0	0.307692	0.173077	0.326923	0.153846	0.0192308	0	0.0192308	0	0	0	0		4.33333	0.5	8.66667	42.4242	9.79021	0.150223
2011-10-26	mound	25	88	0	0	51	0	0	0	0	0	0	0	0	0	139	0.633094	0	0	0.366906	0	0	0	0	0	0	0	0	0	51	0	0	1	0	0	0	0	0	0	0	0	0		4.25	0		216.75	51	0.150223
2011-10-26	mound	26	96	5	4	5	10	12	6	2	4	30	0	0	0	174	0.551724	0.0287356	0.0229885	0.0287356	0.0574713	0.0689655	0.0344828	0.0114943	0.0229885	0.172414	0	0	0	78	0.0641026	0.0512821	0.0641026	0.128205	0.153846	0.0769231	0.025641	0.0512821	0.384615	0	0	0		6.5	4.5	1.44444	69	10.6154	0.150223
2011-10-26	mound	27	95	2	3	0	0	0	1	0	6	60	0	0	0	167	0.568862	0.011976	0.0179641	0	0	0	0.00598802	0	0.0359281	0.359281	0	0	0	72	0.0277778	0.0416667	0	0	0	0.0138889	0	0.0833333	0.833333	0	0	0		6	0		292.545	48.7576	0.150223
2011-10-26	mound	28	88	3	5	3	14	9	22	0	1	7	3	0	0	155	0.567742	0.0193548	0.0322581	0.0193548	0.0903226	0.0580645	0.141935	0	0.00645161	0.0451613	0.0193548	0	0	67	0.0447761	0.0746269	0.0447761	0.208955	0.134328	0.328358	0	0.0149254	0.104478	0.0447761	0	0		5.58333	3	1.86111	44.447	7.96065	0.150223
2011-10-26	mound	29	77	0	0	0	58	0	0	0	0	0	0	0	0	135	0.57037	0	0	0	0.42963	0	0	0	0	0	0	0	0	58	0	0	0	1	0	0	0	0	0	0	0	0		4.83333	0		280.333	58	0.150223
2011-10-26	mound	30	74	8	11	0	2	0	1	0	0	0	2	20	0	118	0.627119	0.0677966	0.0932203	0	0.0169492	0	0.00847458	0	0	0	0.0169492	0.169492	0	44	0.181818	0.25	0	0.0454545	0	0.0227273	0	0	0	0.0454545	0.454545	0		3.66667	0.5	7.33333	39.3333	10.7273	0.150223
2011-10-26	mound	31	73	3	2	4	17	29	0	0	0	0	0	0	0	128	0.570312	0.0234375	0.015625	0.03125	0.132812	0.226562	0	0	0	0	0	0	0	55	0.0545455	0.0363636	0.0727273	0.309091	0.527273	0	0	0	0	0	0	0		4.58333	0		82.447	17.9884	0.150223
2011-10-26	mound	32	82	0	1	47	4	1	3	1	0	0	0	0	0	139	0.589928	0	0.00719424	0.338129	0.028777	0.00719424	0.0215827	0.00719424	0	0	0	0	0	57	0	0.0175439	0.824561	0.0701754	0.0175439	0.0526316	0.0175439	0	0	0	0	0		4.75	0.5	9.5	178.75	37.6316	0.150223
2011-10-26	mound	33	95	0	57	1	0	0	2	0	0	3	0	0	0	158	0.601266	0	0.360759	0.00632911	0	0	0.0126582	0	0	0.0189873	0	0	0	63	0	0.904762	0.015873	0	0	0.031746	0	0	0.047619	0	0	0		5.25	0		266.568	50.7749	0.150223
2011-10-26	mound	34	59	0	0	43	4	0	0	0	0	0	0	0	0	106	0.556604	0	0	0.40566	0.0377358	0	0	0	0	0	0	0	0	47	0	0	0.914894	0.0851064	0	0	0	0	0	0	0	0		3.91667	0		152.811	39.0155	0.150223
2011-10-26	mound	35	112	1	2	1	7	67	1	0	1	0	1	0	0	193	0.580311	0.00518135	0.0103627	0.00518135	0.0362694	0.34715	0.00518135	0	0.00518135	0	0.00518135	0	0	81	0.0123457	0.0246914	0.0123457	0.0864198	0.82716	0.0123457	0	0.0123457	0	0.0123457	0	0		6.75	1	6.75	363.659	53.8754	0.150223
2011-10-26	mound	36	106	0	7	42	17	2	3	6	3	1	0	2	0	189	0.560847	0	0.037037	0.222222	0.0899471	0.010582	0.015873	0.031746	0.015873	0.00529101	0	0.010582	0	83	0	0.0843373	0.506024	0.204819	0.0240964	0.0361446	0.0722892	0.0361446	0.0120482	0	0.0240964	0		6.91667	2.5	2.76667	144.629	20.9102	0.150223
2011-10-26	mound	37	159	66	4	5	6	2	3	3	1	0	0	0	0	249	0.638554	0.26506	0.0160643	0.0200803	0.0240964	0.00803213	0.0120482	0.0120482	0.00401606	0	0	0	0	90	0.733333	0.0444444	0.0555556	0.0666667	0.0222222	0.0333333	0.0333333	0.0111111	0	0	0	0		7.5	2.5	3	343.727	45.8303	0.150223
2011-10-26	mound	38	65	1	4	1	1	0	2	1	2	23	0	0	0	100	0.65	0.01	0.04	0.01	0.01	0	0.02	0.01	0.02	0.23	0	0	0	35	0.0285714	0.114286	0.0285714	0.0285714	0	0.0571429	0.0285714	0.0571429	0.657143	0	0	0		2.91667	1	2.91667	41.3561	14.1792	0.150223
2011-10-26	mound	39	110	0	2	52	9	3	5	0	0	0	0	0	0	181	0.607735	0	0.0110497	0.287293	0.0497238	0.0165746	0.0276243	0	0	0	0	0	0	71	0	0.028169	0.732394	0.126761	0.0422535	0.0704225	0	0	0	0	0	0		5.91667	0		218.447	36.9206	0.150223
2011-10-26	mound	40	45	0	0	0	1	1	5	2	0	0	41	0	0	95	0.473684	0	0	0	0.0105263	0.0105263	0.0526316	0.0210526	0	0	0.431579	0	0	50	0	0	0	0.02	0.02	0.1	0.04	0	0	0.82	0	0		4.16667	0		136.697	32.8073	0.150223
2011-10-26	mound	41	120	0	13	1	62	0	3	0	0	0	2	0	0	201	0.597015	0	0.0646766	0.00497512	0.308458	0	0.0149254	0	0	0	0.00995025	0	0	81	0	0.160494	0.0123457	0.765432	0	0.037037	0	0	0	0.0246914	0	0		6.75	0		316.386	46.8721	0.150223
2011-10-26	mound	42	130	2	1	0	0	69	7	0	0	0	0	1	0	210	0.619048	0.00952381	0.0047619	0	0	0.328571	0.0333333	0	0	0	0	0.0047619	0	80	0.025	0.0125	0	0	0.8625	0.0875	0	0	0	0	0.0125	0		6.66667	0		389.333	58.4	0.150223
2011-10-26	mound	43	112	16	14	9	9	7	5	4	0	0	0	0	0	176	0.636364	0.0909091	0.0795455	0.0511364	0.0511364	0.0397727	0.0284091	0.0227273	0	0	0	0	0	64	0.25	0.21875	0.140625	0.140625	0.109375	0.078125	0.0625	0	0	0	0	0		5.33333	4.5	1.18519	32.9697	6.18182	0.150223
2011-10-26	mound	44	79	1	4	47	1	2	0	0	1	0	0	0	0	135	0.585185	0.00740741	0.0296296	0.348148	0.00740741	0.0148148	0	0	0.00740741	0	0	0	0	56	0.0178571	0.0714286	0.839286	0.0178571	0.0357143	0	0	0.0178571	0	0	0	0		4.66667	0.5	9.33333	179.152	38.3896	0.150223
2011-10-26	mound	45	107	3	9	48	6	2	2	1	0	0	0	0	0	178	0.601124	0.0168539	0.0505618	0.269663	0.0337079	0.011236	0.011236	0.00561798	0	0	0	0	0	71	0.0422535	0.126761	0.676056	0.084507	0.028169	0.028169	0.0140845	0	0	0	0	0		5.91667	1.5	3.94444	183.538	31.0205	0.150223
2011-10-26	mound	46	104	0	5	0	2	0	2	0	28	26	0	0	0	167	0.622754	0	0.0299401	0	0.011976	0	0.011976	0	0.167665	0.155689	0	0	0	63	0	0.0793651	0	0.031746	0	0.031746	0	0.444444	0.412698	0	0	0		5.25	0		105.659	20.1255	0.150223
2011-10-26	mound	47	121	1	12	4	4	25	2	2	3	7	0	0	0	181	0.668508	0.00552486	0.0662983	0.0220994	0.0220994	0.138122	0.0110497	0.0110497	0.0165746	0.038674	0	0	0	60	0.0166667	0.2	0.0666667	0.0666667	0.416667	0.0333333	0.0333333	0.05	0.116667	0	0	0		5	2.5	2	51.6364	10.3273	0.150223
2011-11-01	mound	1	113	1	2	0	53	1	6	0	0	4	3	0	0	183	0.617486	0.00546448	0.010929	0	0.289617	0.00546448	0.0327869	0	0	0.0218579	0.0163934	0	0	70	0.0142857	0.0285714	0	0.757143	0.0142857	0.0857143	0	0	0.0571429	0.0428571	0	0		5.83333	1	5.83333	224.333	38.4571	0.0848816
2011-11-01	mound	2	79	1	9	0	1	0	1	0	0	0	0	5	0	96	0.822917	0.0104167	0.09375	0	0.0104167	0	0.0104167	0	0	0	0	0.0520833	0	17	0.0588235	0.529412	0	0.0588235	0	0.0588235	0	0	0	0	0.294118	0		1.41667	0		7.7197	5.4492	0.0848816
2011-11-01	mound	3	82	0	0	1	0	43	1	1	0	0	0	0	0	128	0.640625	0	0	0.0078125	0	0.335938	0.0078125	0.0078125	0	0	0	0	0	46	0	0	0.0217391	0	0.934783	0.0217391	0.0217391	0	0	0	0	0		3.83333	0		152.333	39.7391	0.0848816
2011-11-01	mound	4	163	4	11	3	11	3	10	2	0	0	4	15	9	235	0.693617	0.0170213	0.0468085	0.012766	0.0468085	0.012766	0.0425532	0.00851064	0	0	0.0170213	0.0638298	0.0382979	72	0.0555556	0.152778	0.0416667	0.152778	0.0416667	0.138889	0.0277778	0	0	0.0555556	0.208333	0.125		6	4	1.5	24.5455	4.09091	0.0848816
2011-11-01	mound	5	128	28	10	12	48	0	4	0	0	0	0	0	0	230	0.556522	0.121739	0.0434783	0.0521739	0.208696	0	0.0173913	0	0	0	0	0	0	102	0.27451	0.0980392	0.117647	0.470588	0	0.0392157	0	0	0	0	0	0		8.5	0		225.545	26.5348	0.0848816
2011-11-01	mound	6	237	6	21	13	27	6	11	1	1	2	16	7	9	357	0.663866	0.0168067	0.0588235	0.0364146	0.0756303	0.0168067	0.0308123	0.00280112	0.00280112	0.00560224	0.0448179	0.0196078	0.0252101	120	0.05	0.175	0.108333	0.225	0.05	0.0916667	0.00833333	0.00833333	0.0166667	0.133333	0.0583333	0.075		10	8	1.25	65.8182	6.58182	0.0848816
2011-11-01	mound	7	59	4	2	1	1	1	2	1	2	3	1	1	39	117	0.504274	0.034188	0.017094	0.00854701	0.00854701	0.00854701	0.017094	0.00854701	0.017094	0.025641	0.00854701	0.00854701	0.333333	58	0.0689655	0.0344828	0.0172414	0.0172414	0.0172414	0.0344828	0.0172414	0.0344828	0.0517241	0.0172414	0.0172414	0.672414		4.83333	1.5	3.22222	116.697	24.1442	0.0848816
2011-11-01	mound	8	100	0	2	2	0	48	1	0	0	0	1	3	0	157	0.636943	0	0.0127389	0.0127389	0	0.305732	0.00636943	0	0	0	0.00636943	0.0191083	0	57	0	0.0350877	0.0350877	0	0.842105	0.0175439	0	0	0	0.0175439	0.0526316	0		4.75	0.5	9.5	186.568	39.2775	0.0848816
2011-11-01	mound	9	76	2	0	1	1	0	2	0	0	0	55	4	0	141	0.539007	0.0141844	0	0.0070922	0.0070922	0	0.0141844	0	0	0	0.390071	0.0283688	0	65	0.0307692	0	0.0153846	0.0153846	0	0.0307692	0	0	0	0.846154	0.0615385	0		5.41667	0.5	10.8333	245.356	45.2965	0.0848816
2011-11-01	mound	10	32	0	0	1	0	0	0	0	0	4	0	4	28	69	0.463768	0	0	0.0144928	0	0	0	0	0	0.057971	0	0.057971	0.405797	37	0	0	0.027027	0	0	0	0	0	0.108108	0	0.108108	0.756757		3.08333	0		63.9015	20.7248	0.0848816
2011-11-01	mound	11	43	0	2	0	0	0	1	2	0	0	0	0	27	75	0.573333	0	0.0266667	0	0	0	0.0133333	0.0266667	0	0	0	0	0.36	32	0	0.0625	0	0	0	0.03125	0.0625	0	0	0	0	0.84375		2.66667	0		59.3333	22.25	0.0848816
2011-11-01	mound	12	101	0	0	0	0	0	4	0	0	0	0	35	0	140	0.721429	0	0	0	0	0	0.0285714	0	0	0	0	0.25	0	39	0	0	0	0	0	0.102564	0	0	0	0	0.897436	0		3.25	0		101.295	31.1678	0.0848816
2011-11-01	mound	13	55	0	1	0	0	0	0	0	0	0	37	2	0	95	0.578947	0	0.0105263	0	0	0	0	0	0	0	0.389474	0.0210526	0	40	0	0.025	0	0	0	0	0	0	0	0.925	0.05	0		3.33333	0		112.788	33.8364	0.0848816
2011-11-01	mound	14	11	0	0	0	1	0	0	0	0	0	0	0	46	58	0.189655	0	0	0	0.0172414	0	0	0	0	0	0	0	0.793103	47	0	0	0	0.0212766	0	0	0	0	0	0	0	0.978723		3.91667	0		175.72	44.8646	0.0848816
2011-11-01	mound	15	84	3	0	0	2	1	1	0	0	0	0	31	3	125	0.672	0.024	0	0	0.016	0.008	0.008	0	0	0	0	0.248	0.024	41	0.0731707	0	0	0.0487805	0.0243902	0.0243902	0	0	0	0	0.756098	0.0731707		3.41667	0.5	6.83333	76.8106	22.4812	0.0848816
2011-11-01	mound	16	53	0	0	0	0	40	0	0	0	0	0	0	0	93	0.569892	0	0	0	0	0.430108	0	0	0	0	0	0	0	40	0	0	0	0	1	0	0	0	0	0	0	0		3.33333	0		133.333	40	0.0848816
2011-11-01	mound	17	15	5	2	1	2	1	1	0	0	0	0	1	21	49	0.306122	0.102041	0.0408163	0.0204082	0.0408163	0.0204082	0.0204082	0	0	0	0	0.0204082	0.428571	34	0.147059	0.0588235	0.0294118	0.0588235	0.0294118	0.0294118	0	0	0	0	0.0294118	0.617647		2.83333	1	2.83333	34.697	12.246	0.0848816
2011-11-01	mound	18	114	1	1	0	0	1	2	0	0	0	0	19	0	138	0.826087	0.00724638	0.00724638	0	0	0.00724638	0.0144928	0	0	0	0	0.137681	0	24	0.0416667	0.0416667	0	0	0.0416667	0.0833333	0	0	0	0	0.791667	0		2	0		29.0909	14.5455	0.0848816
2011-11-01	mound	19	31	1	1	0	0	0	0	1	0	0	0	4	34	72	0.430556	0.0138889	0.0138889	0	0	0	0	0.0138889	0	0	0	0.0555556	0.472222	41	0.0243902	0.0243902	0	0	0	0	0.0243902	0	0	0	0.097561	0.829268		3.41667	0		94.0833	27.5366	0.0848816
2011-11-01	mound	20	16	1	0	2	0	0	0	0	0	0	2	4	35	60	0.266667	0.0166667	0	0.0333333	0	0	0	0	0	0	0.0333333	0.0666667	0.583333	44	0.0227273	0	0.0454545	0	0	0	0	0	0	0.0454545	0.0909091	0.795455		3.66667	0		98.9697	26.9917	0.0848816
2011-11-01	mound	21	52	3	5	1	1	1	3	1	0	0	1	10	40	118	0.440678	0.0254237	0.0423729	0.00847458	0.00847458	0.00847458	0.0254237	0.00847458	0	0	0.00847458	0.0847458	0.338983	66	0.0454545	0.0757576	0.0151515	0.0151515	0.0151515	0.0454545	0.0151515	0	0	0.0151515	0.151515	0.606061		5.5	1	5.5	125.909	22.8926	0.0848816
2011-11-01	mound	22	101	34	3	0	1	5	1	0	1	0	6	11	0	163	0.619632	0.208589	0.0184049	0	0.00613497	0.0306748	0.00613497	0	0.00613497	0	0.0368098	0.0674847	0	62	0.548387	0.0483871	0	0.016129	0.0806452	0.016129	0	0.016129	0	0.0967742	0.177419	0		5.16667	1	5.16667	93.6061	18.1173	0.0848816
2011-11-01	mound	23	116	1	0	0	1	1	3	1	0	0	93	0	0	216	0.537037	0.00462963	0	0	0.00462963	0.00462963	0.0138889	0.00462963	0	0	0.430556	0	0	100	0.01	0	0	0.01	0.01	0.03	0.01	0	0	0.93	0	0		8.33333	0.5	16.6667	711.697	85.4036	0.0848816
2011-11-01	mound	24	167	0	0	0	0	0	0	0	0	0	0	0	0	167	1	0	0	0	0	0	0	0	0	0	0	0	0	0														0	0		0		0.0848816
2011-11-01	mound	25	87	1	0	0	0	0	2	0	0	0	0	19	0	109	0.798165	0.00917431	0	0	0	0	0.0183486	0	0	0	0	0.174312	0	22	0.0454545	0	0	0	0	0.0909091	0	0	0	0	0.863636	0		1.83333	0		29.6061	16.1488	0.0848816
2011-11-01	mound	26	74	14	12	1	10	3	1	0	0	0	0	6	21	142	0.521127	0.0985915	0.084507	0.00704225	0.0704225	0.0211268	0.00704225	0	0	0	0	0.0422535	0.147887	68	0.205882	0.176471	0.0147059	0.147059	0.0441176	0.0147059	0	0	0	0	0.0882353	0.308824		5.66667	2	2.83333	49.3333	8.70588	0.0848816
2011-11-01	mound	27	37	9	0	0	0	0	0	0	0	0	0	0	0	46	0.804348	0.195652	0	0	0	0	0	0	0	0	0	0	0	9	1	0	0	0	0	0	0	0	0	0	0	0		0.75	0		6.75	9	0.0848816
2011-11-01	mound	28	80	3	0	0	3	0	0	4	1	0	4	2	30	127	0.629921	0.023622	0	0	0.023622	0	0	0.0314961	0.00787402	0	0.0314961	0.015748	0.23622	47	0.0638298	0	0	0.0638298	0	0	0.0851064	0.0212766	0	0.0851064	0.0425532	0.638298		3.91667	1.5	2.61111	70.0833	17.8936	0.0848816
2011-11-01	mound	29	59	0	0	0	1	0	0	0	0	0	1	24	0	85	0.694118	0	0	0	0.0117647	0	0	0	0	0	0.0117647	0.282353	0	26	0	0	0	0.0384615	0	0	0	0	0	0.0384615	0.923077	0		2.16667	0		47.4242	21.8881	0.0848816
2011-11-01	mound	30	71	1	0	0	0	0	1	0	0	0	22	8	0	103	0.68932	0.00970874	0	0	0	0	0.00970874	0	0	0	0.213592	0.0776699	0	32	0.03125	0	0	0	0	0.03125	0	0	0	0.6875	0.25	0		2.66667	0		42.2424	15.8409	0.0848816
2011-11-01	mound	31	66	0	1	0	42	0	2	0	0	0	1	0	0	112	0.589286	0	0.00892857	0	0.375	0	0.0178571	0	0	0	0.00892857	0	0	46	0	0.0217391	0	0.913043	0	0.0434783	0	0	0	0.0217391	0	0		3.83333	0		144.879	37.7945	0.0848816
2011-11-01	mound	32	86	1	0	0	40	0	1	0	0	0	1	0	0	129	0.666667	0.00775194	0	0	0.310078	0	0.00775194	0	0	0	0.00775194	0	0	43	0.0232558	0	0	0.930233	0	0.0232558	0	0	0	0.0232558	0	0		3.58333	0		131.72	36.759	0.0848816
2011-11-01	mound	33	51	3	3	1	0	1	1	0		0	0	24	5	89	0.573034	0.0337079	0.0337079	0.011236	0	0.011236	0.011236	0		0	0	0.269663	0.0561798	38	0.0789474	0.0789474	0.0263158	0	0.0263158	0.0263158	0		0	0	0.631579	0.131579		3.45455	1	3.45455	49.0727	14.2053	0.0848816
2011-11-01	mound	34	84	0	5	18	1	0	0	0	0	0	2	21	0	131	0.641221	0	0.0381679	0.137405	0.00763359	0	0	0	0	0	0.0152672	0.160305	0	47	0	0.106383	0.382979	0.0212766	0	0	0	0	0	0.0425532	0.446809	0		3.91667	0		55.5379	14.1799	0.0848816
2011-11-01	mound	35	104	0	18	36	0	2	1	0	0	0	0	0	0	161	0.645963	0	0.111801	0.223602	0	0.0124224	0.00621118	0	0	0	0	0	0	57	0	0.315789	0.631579	0	0.0350877	0.0175439	0	0	0	0	0	0		4.75	0		123.114	25.9187	0.0848816
2011-11-01	mound	36	42	0	16	2	0	0	0	0	0	1	0	1	0	62	0.677419	0	0.258065	0.0322581	0	0	0	0	0	0.016129	0	0.016129	0	20	0	0.8	0.1	0	0	0	0	0	0.05	0	0.05	0		1.66667	0		20.7879	12.4727	0.0848816
2011-11-01	mound	37	97	3	6	7	5	2	7	0	1	0	2	23	0	153	0.633987	0.0196078	0.0392157	0.0457516	0.0326797	0.0130719	0.0457516	0	0.00653595	0	0.0130719	0.150327	0	56	0.0535714	0.107143	0.125	0.0892857	0.0357143	0.125	0	0.0178571	0	0.0357143	0.410714	0		4.66667	2.5	1.86667	40.4242	8.66234	0.0848816
2011-11-01	mound	38	71	0	0	0	0	0	0	0	0	0	20	4	0	95	0.747368	0	0	0	0	0	0	0	0	0	0.210526	0.0421053	0	24	0	0	0	0	0	0	0	0	0	0.833333	0.166667	0		2	0		33.4545	16.7273	0.0848816
2011-11-01	mound	39	139	2	5	1	1	0	0	0	0	44	43	23	0	258	0.53876	0.00775194	0.0193798	0.00387597	0.00387597	0	0	0	0	0.170543	0.166667	0.0891473	0	119	0.0168067	0.0420168	0.00840336	0.00840336	0	0	0	0	0.369748	0.361345	0.193277	0		9.91667	1	9.91667	287.72	29.0138	0.0848816
2011-11-01	mound	40	111	1	1	0	0	0	0	0	0	0	79	0	0	192	0.578125	0.00520833	0.00520833	0	0	0	0	0	0	0	0.411458	0	0	81	0.0123457	0.0123457	0	0	0	0	0	0	0	0.975309	0	0		6.75	0		517.841	76.7172	0.0848816
2011-11-01	mound	41	122	0	1	0	7	25	2	0	0	0	1	3	0	161	0.757764	0	0.00621118	0	0.0434783	0.15528	0.0124224	0	0	0	0.00621118	0.0186335	0	39	0	0.025641	0	0.179487	0.641026	0.0512821	0	0	0	0.025641	0.0769231	0		3.25	0.5	6.5	51.1136	15.7273	0.0848816
2011-11-01	mound	42	87	0	0	0	0	0	0	0	0	46	3	0	0	136	0.639706	0	0	0	0	0	0	0	0	0.338235	0.0220588	0	0	49	0	0	0	0	0	0	0	0	0.938776	0.0612245	0	0		4.08333	0		174.992	42.8553	0.0848816
2011-11-01	mound	43	93	1	0	0	0	20	19	0	0	0	0	3	0	136	0.683824	0.00735294	0	0	0	0.147059	0.139706	0	0	0	0	0.0220588	0	43	0.0232558	0	0	0	0.465116	0.44186	0	0	0	0	0.0697674	0		3.58333	0		56.0833	15.6512	0.0848816
2011-11-01	mound	44	56	1	0	0	0	0	3	0	0	0	0	16	0	76	0.736842	0.0131579	0	0	0	0	0.0394737	0	0	0	0	0.210526	0	20	0.05	0	0	0	0	0.15	0	0	0	0	0.8	0		1.66667	0		21.1515	12.6909	0.0848816
2011-11-01	mound	45	40	4	5	4	2	1	2	0	0	0	0	7	47	112	0.357143	0.0357143	0.0446429	0.0357143	0.0178571	0.00892857	0.0178571	0	0	0	0	0.0625	0.419643	72	0.0555556	0.0694444	0.0555556	0.0277778	0.0138889	0.0277778	0	0	0	0	0.0972222	0.652778		6	2	3	172	28.6667	0.0848816
2011-11-01	mound	46	36	0	2	2	5	1	0	0	0	0	0	2	40	88	0.409091	0	0.0227273	0.0227273	0.0568182	0.0113636	0	0	0	0	0	0.0227273	0.454545	52	0	0.0384615	0.0384615	0.0961538	0.0192308	0	0	0	0	0	0.0384615	0.769231		4.33333	0.5	8.66667	128.424	29.6364	0.0848816
2011-11-01	mound	47	66	0	3	0	0	0	0	0	0	0	24	5	0	98	0.673469	0	0.0306122	0	0	0	0	0	0	0	0.244898	0.0510204	0	32	0	0.09375	0	0	0	0	0	0	0	0.75	0.15625	0		2.66667	0		47.697	17.8864	0.0848816
2011-11-01	mound	48	117	0	1	11	2	34	3	0	0	0	0	0	0	168	0.696429	0	0.00595238	0.0654762	0.0119048	0.202381	0.0178571	0	0	0	0	0	0	51	0	0.0196078	0.215686	0.0392157	0.666667	0.0588235	0	0	0	0	0	0		4.25	0		97.6591	22.9786	0.0848816
2011-11-03	mound	1	126	36	7	1	12	26	3	0	0	0	0	8	0	219	0.575342	0.164384	0.0319635	0.00456621	0.0547945	0.118721	0.0136986	0	0	0	0	0.0365297	0	93	0.387097	0.0752688	0.0107527	0.129032	0.27957	0.0322581	0	0	0	0	0.0860215	0		7.75	2	3.875	138.023	17.8094	0.0815751
2011-11-03	mound	2	91	2	6	9	13	10	6	0	0	0	0	1	0	138	0.65942	0.0144928	0.0434783	0.0652174	0.0942029	0.0724638	0.0434783	0	0	0	0	0.00724638	0	47	0.0425532	0.12766	0.191489	0.276596	0.212766	0.12766	0	0	0	0	0.0212766	0		3.91667	1.5	2.61111	22.0833	5.6383	0.0815751
2011-11-03	mound	3	140	0	0	0	0	0	2	0	0	0	0	0	0	142	0.985915	0	0	0	0	0	0.0140845	0	0	0	0	0	0	2	0	0	0	0	0	1	0	0	0	0	0	0		0.166667	0		0.333333	2	0.0815751
2011-11-03	mound	4	124	0	87	0	0	1	1	0	0	0	0	0	0	213	0.58216	0	0.408451	0	0	0.00469484	0.00469484	0	0	0	0	0	0	89	0	0.977528	0	0	0.011236	0.011236	0	0	0	0	0	0		7.41667	0		628.265	84.7099	0.0815751
2011-11-03	mound	5	142	0	0	0	0	0	0	0	0	0	0	0	0	142	1	0	0	0	0	0	0	0	0	0	0	0	0	0														0	0		0		0.0815751
2011-11-03	mound	6	129	0	0	0	0	0	0	0	0	0	103	0	0	232	0.556034	0	0	0	0	0	0	0	0	0	0.443966	0	0	103	0	0	0	0	0	0	0	0	0	1	0	0		8.58333	0		884.083	103	0.0815751
2011-11-03	mound	7	126	0	0	0	0	0	0	0	0	48	8	0	0	182	0.692308	0	0	0	0	0	0	0	0	0.263736	0.043956	0	0	56	0	0	0	0	0	0	0	0	0.857143	0.142857	0	0		4.66667	0		191.515	41.039	0.0815751
2011-11-03	mound	8	63	0	0	0	50	0	0	0	0	0	0	0	0	113	0.557522	0	0	0	0.442478	0	0	0	0	0	0	0	0	50	0	0	0	1	0	0	0	0	0	0	0	0		4.16667	0		208.333	50	0.0815751
2011-11-03	mound	9	160	0	0	0	0	0	0	0	0	0	0	0	0	160	1	0	0	0	0	0	0	0	0	0	0	0	0	0														0	0		0		0.0815751
2011-11-03	mound	10	88	0	0	0	0	0	1	0	0	1	0	18	0	108	0.814815	0	0	0	0	0	0.00925926	0	0	0.00925926	0	0.166667	0	20	0	0	0	0	0	0.05	0	0	0.05	0	0.9	0		1.66667	0		26.6061	15.9636	0.0815751
2011-11-03	mound	11	90	0	2	1	24	29	0	0	2	0	0	0	0	148	0.608108	0	0.0135135	0.00675676	0.162162	0.195946	0	0	0.0135135	0	0	0	0	58	0	0.0344828	0.0172414	0.413793	0.5	0	0	0.0344828	0	0	0	0		4.83333	0		104.152	21.5486	0.0815751
2011-11-03	mound	12	138	1	0	0	88	0	0	2	2	0	0	0	0	231	0.597403	0.004329	0	0	0.380952	0	0	0.00865801	0.00865801	0	0	0	0	93	0.0107527	0	0	0.946237	0	0	0.0215054	0.0215054	0	0	0	0		7.75	0		639.295	82.4897	0.0815751
2011-11-03	mound	13	117	55	1	17	0	0	2	0	0	0	0	0	0	192	0.609375	0.286458	0.00520833	0.0885417	0	0	0.0104167	0	0	0	0	0	0	75	0.733333	0.0133333	0.226667	0	0	0.0266667	0	0	0	0	0	0		6.25	0		259.114	41.4582	0.0815751
2011-11-03	mound	14	20	0	0	2	0	0	0	0	0	0	0	3	61	86	0.232558	0	0	0.0232558	0	0	0	0	0	0	0	0.0348837	0.709302	66	0	0	0.030303	0	0	0	0	0	0	0	0.0454545	0.924242		5.5	0		306.455	55.719	0.0815751
2011-11-03	mound	15	95	0	0	0	0	0	0	0	0	0	69	0	0	164	0.579268	0	0	0	0	0	0	0	0	0	0.420732	0	0	69	0	0	0	0	0	0	0	0	0	1	0	0		5.75	0		396.75	69	0.0815751
2011-11-03	mound	16	109	0	0	0	75	0	1	1	0	0	0	0	0	186	0.586022	0	0	0	0.403226	0	0.00537634	0.00537634	0	0	0	0	0	77	0	0	0	0.974026	0	0.012987	0.012987	0	0	0	0	0		6.41667	0		466.629	72.7214	0.0815751
2011-11-03	mound	17	31	0	0	0	2	8	1	0	0	0	1	1	33	77	0.402597	0	0	0	0.025974	0.103896	0.012987	0	0	0	0.012987	0.012987	0.428571	46	0	0	0	0.0434783	0.173913	0.0217391	0	0	0	0.0217391	0.0217391	0.717391		3.83333	0.5	7.66667	89.4242	23.3281	0.0815751
2011-11-03	mound	18	110	1	0	3	20	22	0	0	0	0	0	6	0	162	0.679012	0.00617284	0	0.0185185	0.123457	0.135802	0	0	0	0	0	0.037037	0	52	0.0192308	0	0.0576923	0.384615	0.423077	0	0	0	0	0	0.115385	0		4.33333	0		64.0606	14.7832	0.0815751
2011-11-03	mound	19	20	1	0	0	1	0	0	0	0	0	0	0	44	66	0.30303	0.0151515	0	0	0.0151515	0	0	0	0	0	0	0	0.666667	46	0.0217391	0	0	0.0217391	0	0	0	0	0	0	0	0.956522		3.83333	0		160.152	41.7787	0.0815751
2011-11-03	mound	20	23	0	1	0	0	0	0	0	0	0	1	0	30	55	0.418182	0	0.0181818	0	0	0	0	0	0	0	0.0181818	0	0.545455	32	0	0.03125	0	0	0	0	0	0	0	0.03125	0	0.9375		2.66667	0		74.2424	27.8409	0.0815751
2011-11-03	mound	21	66	0	0	0	0	0	0	0	0	6	51	0	7	130	0.507692	0	0	0	0	0	0	0	0	0.0461538	0.392308	0	0.0538462	64	0	0	0	0	0	0	0	0	0.09375	0.796875	0	0.109375		5.33333	0		213.152	39.9659	0.0815751
2011-11-03	mound	22	106	0	0	0	2	53	1	0	0	0	0	6	0	168	0.630952	0	0	0	0.0119048	0.315476	0.00595238	0	0	0	0	0.0357143	0	62	0	0	0	0.0322581	0.854839	0.016129	0	0	0	0	0.0967742	0		5.16667	0		229.97	44.5103	0.0815751
2011-11-03	mound	23	86	0	0	0	1	42	0	0	1	0	0	0	11	141	0.609929	0	0	0	0.0070922	0.297872	0	0	0.0070922	0	0	0	0.0780142	55	0	0	0	0.0181818	0.763636	0	0	0.0181818	0	0	0	0.2		4.58333	0		148.629	32.4281	0.0815751
2011-11-03	mound	24	115	0	6	0	4	0	0	0	0	0	0	7	0	132	0.871212	0	0.0454545	0	0.030303	0	0	0	0	0	0	0.0530303	0	17	0	0.352941	0	0.235294	0	0	0	0	0	0	0.411765	0		1.41667	0		6.99242	4.93583	0.0815751
2011-11-04	mound	1	65	2	1	3	4	2	2	0	0	0	0	0	54	133	0.488722	0.0150376	0.0075188	0.0225564	0.0300752	0.0150376	0.0150376	0	0	0	0	0	0.406015	68	0.0294118	0.0147059	0.0441176	0.0588235	0.0294118	0.0294118	0	0	0	0	0	0.794118		5.66667	1.5	3.77778	233.515	41.2086	0.0998138
2011-11-04	mound	2	40	2	0	0	0	0	0	0	0	0	1	2	51	96	0.416667	0.0208333	0	0	0	0	0	0	0	0	0.0104167	0.0208333	0.53125	56	0.0357143	0	0	0	0	0	0	0	0	0.0178571	0.0357143	0.910714		4.66667	0		213.515	45.7532	0.0998138
2011-11-04	mound	3	93	0	0	1	0	0	4	0	0	0	1	40	67	206	0.451456	0	0	0.00485437	0	0	0.0194175	0	0	0	0.00485437	0.194175	0.325243	113	0	0	0.00884956	0	0	0.0353982	0	0	0	0.00884956	0.353982	0.59292		9.41667	0		458.447	48.6846	0.0998138
2011-11-04	mound	4	88	1	0	0	0	0	0	0	0	0	0	26	0	115	0.765217	0.00869565	0	0	0	0	0	0	0	0	0	0.226087	0	27	0.037037	0	0	0	0	0	0	0	0	0	0.962963	0		2.25	0		56.0227	24.899	0.0998138
2011-11-04	mound	5	103	1	1	0	0	3	2	0	0	0	69	3	10	192	0.536458	0.00520833	0.00520833	0	0	0.015625	0.0104167	0	0	0	0.359375	0.015625	0.0520833	89	0.011236	0.011236	0	0	0.0337079	0.0224719	0	0	0	0.775281	0.0337079	0.11236		7.41667	1	7.41667	384.083	51.7865	0.0998138
2011-11-04	mound	6	134	5	0	4	8	35	0	1	0	0	0	5	4	196	0.683673	0.0255102	0	0.0204082	0.0408163	0.178571	0	0.00510204	0	0	0	0.0255102	0.0204082	62	0.0806452	0	0.0645161	0.129032	0.564516	0	0.016129	0	0	0	0.0806452	0.0645161		5.16667	2.5	2.06667	95.6061	18.5044	0.0998138
2011-11-04	mound	7	88	0	1	2	0	39	0	1	0	0	0	0	0	131	0.671756	0	0.00763359	0.0152672	0	0.29771	0	0.00763359	0	0	0	0	0	43	0	0.0232558	0.0465116	0	0.906977	0	0.0232558	0	0	0	0	0		3.58333	0		124.811	34.8309	0.0998138
2011-11-04	mound	8	45	0	0	0	0	0	1	0	0	0	1	0	47	94	0.478723	0	0	0	0	0	0.0106383	0	0	0	0.0106383	0	0.5	49	0	0	0	0	0	0.0204082	0	0	0	0.0204082	0	0.959184		4.08333	0		182.811	44.7699	0.0998138
2011-11-04	mound	9	89	0	23	0	4	1	1	19	0	0	0	7	1	145	0.613793	0	0.158621	0	0.0275862	0.00689655	0.00689655	0.131034	0	0	0	0.0482759	0.00689655	56	0	0.410714	0	0.0714286	0.0178571	0.0178571	0.339286	0	0	0	0.125	0.0178571		4.66667	1	4.66667	63.3333	13.5714	0.0998138
2011-11-04	mound	10	112	1	0	0	6	0	1	1	0	0	11	17	2	151	0.741722	0.00662252	0	0	0.0397351	0	0.00662252	0.00662252	0	0	0.0728477	0.112583	0.013245	39	0.025641	0	0	0.153846	0	0.025641	0.025641	0	0	0.282051	0.435897	0.0512821		3.25	1	3.25	29.6591	9.12587	0.0998138
2011-11-04	mound	11	71	0	0	0	2	1	0	0	0	0	0	5	0	79	0.898734	0	0	0	0.0253165	0.0126582	0	0	0	0	0	0.0632911	0	8	0	0	0	0.25	0.125	0	0	0	0	0	0.625	0		0.666667	0		2.24242	3.36364	0.0998138
2011-11-04	mound	12	86	8	0	0	2	34	3	0	0	0	0	50	0	183	0.469945	0.0437158	0	0	0.010929	0.185792	0.0163934	0	0	0	0	0.273224	0	97	0.0824742	0	0	0.0206186	0.350515	0.0309278	0	0	0	0	0.515464	0		8.08333	0		268.083	33.1649	0.0998138
2011-11-04	mound	13	23	0	0	0	0	0	0	0	0	0	0	0	56	79	0.291139	0	0	0	0	0	0	0	0	0	0	0	0.708861	56	0	0	0	0	0	0	0	0	0	0	0	1		4.66667	0		261.333	56	0.0998138
2011-11-04	mound	14	108	0	0	0	4	57	1	0	0	0	0	6	5	181	0.596685	0	0	0	0.0220994	0.314917	0.00552486	0	0	0	0	0.0331492	0.0276243	73	0	0	0	0.0547945	0.780822	0.0136986	0	0	0	0	0.0821918	0.0684932		6.08333	0		262.083	43.0822	0.0998138
2011-11-04	mound	15	174	4	2	4	25	6	4	0	0	0	0	4	58	281	0.619217	0.0142349	0.00711744	0.0142349	0.088968	0.0213523	0.0142349	0	0	0	0	0.0142349	0.206406	107	0.0373832	0.0186916	0.0373832	0.233645	0.0560748	0.0373832	0	0	0	0	0.0373832	0.542056		8.91667	4	2.22917	285.356	32.0025	0.0998138
2011-11-04	mound	16	125	0	0	4	9	50	6	0	0	0	0	1	5	200	0.625	0	0	0.02	0.045	0.25	0.03	0	0	0	0	0.005	0.025	75	0	0	0.0533333	0.12	0.666667	0.08	0	0	0	0	0.0133333	0.0666667		6.25	0.5	12.5	199.114	31.8582	0.0998138
2011-11-04	mound	17	55	0	0	0	0	2	1	0	0	0	0	2	27	87	0.632184	0	0	0	0	0.0229885	0.0114943	0	0	0	0	0.0229885	0.310345	32	0	0	0	0	0.0625	0.03125	0	0	0	0	0.0625	0.84375		2.66667	0		59.3333	22.25	0.0998138
2011-11-04	mound	18	26	0	0	0	0	4	0	0	0	0	0	0	66	96	0.270833	0	0	0	0	0.0416667	0	0	0	0	0	0	0.6875	70	0	0	0	0	0.0571429	0	0	0	0	0	0	0.942857		5.83333	0		360.333	61.7714	0.0998138
2011-11-04	mound	19	23	0	0	0	0	0	0	0	0	0	0	0	45	68	0.338235	0	0	0	0	0	0	0	0	0	0	0	0.661765	45	0	0	0	0	0	0	0	0	0	0	0	1		3.75	0		168.75	45	0.0998138
2011-11-04	mound	20	83	0	37	0	4	4	0	0	0	0	0	0	1	129	0.643411	0	0.286822	0	0.0310078	0.0310078	0	0	0	0	0	0	0.00775194	46	0	0.804348	0	0.0869565	0.0869565	0	0	0	0	0	0	0.0217391		3.83333	0		111.424	29.0672	0.0998138
2011-11-04	mound	21	90	0	0	4	48	2	4	0	0	0	0	0	0	148	0.608108	0	0	0.027027	0.324324	0.0135135	0.027027	0	0	0	0	0	0	58	0	0	0.0689655	0.827586	0.0344828	0.0689655	0	0	0	0	0	0		4.83333	0		187.242	38.7398	0.0998138
2011-11-04	mound	22	61	0	0	0	0	31	0	0	0	0	0	0	0	92	0.663043	0	0	0	0	0.336957	0	0	0	0	0	0	0	31	0	0	0	0	1	0	0	0	0	0	0	0		2.58333	0		80.0833	31	0.0998138
2011-11-04	mound	23	29	0	1	1	0	2	0	0	0	0	0	0	52	85	0.341176	0	0.0117647	0.0117647	0	0.0235294	0	0	0	0	0	0	0.611765	56	0	0.0178571	0.0178571	0	0.0357143	0	0	0	0	0	0	0.928571		4.66667	0		222.606	47.7013	0.0998138
2011-11-04	mound	24	32	0	0	0	0	2	0	0	0	0	1	0	28	63	0.507937	0	0	0	0	0.031746	0	0	0	0	0.015873	0	0.444444	31	0	0	0	0	0.0645161	0	0	0	0	0.0322581	0	0.903226		2.58333	0		64.447	24.9472	0.0998138
2011-11-04	mound	25	38	0	0	0	1	0	0	0	0	0	0	0	49	88	0.431818	0	0	0	0.0113636	0	0	0	0	0	0	0	0.556818	50	0	0	0	0.02	0	0	0	0	0	0	0	0.98		4.16667	0		199.424	47.8618	0.0998138
2011-11-04	mound	26	20	0	0	0	0	0	0	0	0	0	0	1	20	41	0.487805	0	0	0	0	0	0	0	0	0	0	0.0243902	0.487805	21	0	0	0	0	0	0	0	0	0	0	0.047619	0.952381		1.75	0		33.1136	18.9221	0.0998138
2011-11-04	mound	27	109	0	0	0	0	0	0	0	0	0	0	42	0	151	0.721854	0	0	0	0	0	0	0	0	0	0	0.278146	0	42	0	0	0	0	0	0	0	0	0	0	1	0		3.5	0		147	42	0.0998138
2011-11-04	mound	28	63	2	1	0	22	0	3	0	0	0	0	1	21	113	0.557522	0.0176991	0.00884956	0	0.19469	0	0.0265487	0	0	0	0	0.00884956	0.185841	50	0.04	0.02	0	0.44	0	0.06	0	0	0	0	0.02	0.42		4.16667	0.5	8.33333	66.5152	15.9636	0.0998138
2011-11-04	mound	29	89	0	0	1	0	28	1	0	0	0	0	0	0	119	0.747899	0	0	0.00840336	0	0.235294	0.00840336	0	0	0	0	0	0	30	0	0	0.0333333	0	0.933333	0.0333333	0	0	0	0	0	0		2.5	0		64.6364	25.8545	0.0998138
2011-11-04	mound	30	94	0	0	4	0	39	0	0	0	0	0	0	0	137	0.686131	0	0	0.0291971	0	0.284672	0	0	0	0	0	0	0	43	0	0	0.0930233	0	0.906977	0	0	0	0	0	0	0		3.58333	0		125.72	35.0846	0.0998138
2011-11-04	mound	31	40	2	4	1	0	2	0	0	0	0	0	0	35	84	0.47619	0.0238095	0.047619	0.0119048	0	0.0238095	0	0	0	0	0	0	0.416667	44	0.0454545	0.0909091	0.0227273	0	0.0454545	0	0	0	0	0	0	0.795455		3.66667	0		98.9697	26.9917	0.0998138
2011-11-04	mound	32	52	0	32	0	0	0	1	0	0	0	0	1	1	87	0.597701	0	0.367816	0	0	0	0.0114943	0	0	0	0	0.0114943	0.0114943	35	0	0.914286	0	0	0	0.0285714	0	0	0	0	0.0285714	0.0285714		2.91667	0		84.0833	28.8286	0.0998138
2011-11-04	mound	33	102	1	1	27	3	16	2	0	0	0	0	0	4	156	0.653846	0.00641026	0.00641026	0.173077	0.0192308	0.102564	0.0128205	0	0	0	0	0	0.025641	54	0.0185185	0.0185185	0.5	0.0555556	0.296296	0.037037	0	0	0	0	0	0.0740741		4.5	1	4.5	70.2727	15.6162	0.0998138
2011-11-04	mound	34	25	2	0	0	0	0	0	0	0	0	0	0	29	56	0.446429	0.0357143	0	0	0	0	0	0	0	0	0	0	0.517857	31	0.0645161	0	0	0	0	0	0	0	0	0	0	0.935484		2.58333	0		69.5379	26.9179	0.0998138
2011-11-04	mound	35	95	0	0	0	0	0	1	0	0	2	0	43	12	153	0.620915	0	0	0	0	0	0.00653595	0	0	0.0130719	0	0.281046	0.0784314	58	0	0	0	0	0	0.0172414	0	0	0.0344828	0	0.741379	0.206897		4.83333	0		156.152	32.3072	0.0998138
2011-11-04	mound	36	49	0	1	0	0	27	0	0	0	0	0	0	0	77	0.636364	0	0.012987	0	0	0.350649	0	0	0	0	0	0	0	28	0	0.0357143	0	0	0.964286	0	0	0	0	0	0	0		2.33333	0		60.4242	25.8961	0.0998138
2011-11-04	mound	37	129	0	0	2	0	60	3	0	0	0	0	0	0	194	0.664948	0	0	0.0103093	0	0.309278	0.0154639	0	0	0	0	0	0	65	0	0	0.0307692	0	0.923077	0.0461538	0	0	0	0	0	0		5.41667	0		296.447	54.7287	0.0998138
2011-11-04	mound	38	30	0	0	0	1	5	2	0	0	0	0	4	16	58	0.517241	0	0	0	0.0172414	0.0862069	0.0344828	0	0	0	0	0.0689655	0.275862	28	0	0	0	0.0357143	0.178571	0.0714286	0	0	0	0	0.142857	0.571429		2.33333	0		21.5152	9.22078	0.0998138
2011-11-04	mound	39	71	0	1	0	0	29	0	0	0	0	0	4	0	105	0.67619	0	0.00952381	0	0	0.27619	0	0	0	0	0	0.0380952	0	34	0	0.0294118	0	0	0.852941	0	0	0	0	0	0.117647	0		2.83333	0		69.2424	24.4385	0.0998138
2011-11-04	mound	40	140	0	0	0	0	3	2	0	0	0	0	81	0	226	0.619469	0	0	0	0	0.0132743	0.00884956	0	0	0	0	0.358407	0	86	0	0	0	0	0.0348837	0.0232558	0	0	0	0	0.94186	0		7.16667	0		541.606	75.5729	0.0998138
2011-11-04	mound	41	17	0	0	1	0	0	0	0	0	0	0	0	31	49	0.346939	0	0	0.0204082	0	0	0	0	0	0	0	0	0.632653	32	0	0	0.03125	0	0	0	0	0	0	0	0	0.96875		2.66667	0		79.697	29.8864	0.0998138
2011-11-04	mound	42	51	0	0	2	20	5	0	1	1	0	0	0	0	80	0.6375	0	0	0.025	0.25	0.0625	0	0.0125	0.0125	0	0	0	0	29	0	0	0.0689655	0.689655	0.172414	0	0.0344828	0.0344828	0	0	0	0		2.41667	0		32.8106	13.5768	0.0998138
2011-11-04	mound	43	90	0	0	0	1	52	3	0	0	0	0	0	0	146	0.616438	0	0	0	0.00684932	0.356164	0.0205479	0	0	0	0	0	0	56	0	0	0	0.0178571	0.928571	0.0535714	0	0	0	0	0	0		4.66667	0		222.97	47.7792	0.0998138
2011-11-04	mound	44	95	0	1	1	2	24	39	0	0	0	0	0	1	163	0.582822	0	0.00613497	0.00613497	0.0122699	0.147239	0.239264	0	0	0	0	0	0.00613497	68	0	0.0147059	0.0147059	0.0294118	0.352941	0.573529	0	0	0	0	0	0.0147059		5.66667	0.5	11.3333	156.242	27.5722	0.0998138
2011-11-04	mound	45	129	0	2	0	57	18	1	1	0	0	0	2	0	210	0.614286	0	0.00952381	0	0.271429	0.0857143	0.0047619	0.0047619	0	0	0	0.00952381	0	81	0	0.0246914	0	0.703704	0.222222	0.0123457	0.0123457	0	0	0	0.0246914	0		6.75	0.5	13.5	276.023	40.8923	0.0998138
2011-11-04	mound	46	141	0	4	0	7	1	0	0	0	0	0	27	1	181	0.779006	0	0.0220994	0	0.038674	0.00552486	0	0	0	0	0	0.149171	0.00552486	40	0	0.1	0	0.175	0.025	0	0	0	0	0	0.675	0.025		3.33333	0		60.2424	18.0727	0.0998138
2011-11-04	mound	47	27	0	0	0	1	0	1	0	0	0	0	0	42	71	0.380282	0	0	0	0.0140845	0	0.0140845	0	0	0	0	0	0.591549	44	0	0	0	0.0227273	0	0.0227273	0	0	0	0	0	0.954545		3.66667	0		145.879	39.7851	0.0998138
2011-11-04	mound	48	145	0	0	1	0	55	1	11	0	0	1	0	0	214	0.67757	0	0	0.0046729	0	0.257009	0.0046729	0.0514019	0	0	0.0046729	0	0	69	0	0	0.0144928	0	0.797101	0.0144928	0.15942	0	0	0.0144928	0	0		5.75	0		250.205	43.5138	0.0998138
2011-11-06	mound	1	151	7	6	1	2	1	3	0	0	0	0	0	0	171	0.883041	0.0409357	0.0350877	0.00584795	0.0116959	0.00584795	0.0175439	0	0	0	0	0	0	20	0.35	0.3	0.05	0.1	0.05	0.15	0	0	0	0	0	0		1.66667	0.5	3.33333	6.06061	3.63636	0.058123
2011-11-06	mound	2	120	0	0	0	0	0	0	0	0	0	0	0	0	120	1	0	0	0	0	0	0	0	0	0	0	0	0	0														0	0		0		0.058123
2011-11-06	mound	3	41	0	1	1	0	0	2	0	0	0	0	1	44	90	0.455556	0	0.0111111	0.0111111	0	0	0.0222222	0	0	0	0	0.0111111	0.488889	49	0	0.0204082	0.0204082	0	0	0.0408163	0	0	0	0	0.0204082	0.897959		4.08333	0		158.447	38.8033	0.058123
2011-11-06	mound	4	91	0	0	0	0	0	2	0	0	0	0	23	1	117	0.777778	0	0	0	0	0	0.017094	0	0	0	0	0.196581	0.00854701	26	0	0	0	0	0	0.0769231	0	0	0	0	0.884615	0.0384615		2.16667	0		43.4242	20.042	0.058123
2011-11-06	mound	5	103	3	2	1	4	0	4	1	1	0	0	2	1	122	0.844262	0.0245902	0.0163934	0.00819672	0.0327869	0	0.0327869	0.00819672	0.00819672	0	0	0.0163934	0.00819672	19	0.157895	0.105263	0.0526316	0.210526	0	0.210526	0.0526316	0.0526316	0	0	0.105263	0.0526316		1.58333	1	1.58333	2.08333	1.31579	0.058123
2011-11-06	mound	6	129	0	0	6	0	58	6	0	0	0	0	1	0	200	0.645	0	0	0.03	0	0.29	0.03	0	0	0	0	0.005	0	71	0	0	0.084507	0	0.816901	0.084507	0	0	0	0	0.0140845	0		5.91667	0		274.265	46.3547	0.058123
2011-11-06	mound	7	70	2	0	1	1	1	11	0	0	0	0	5	0	91	0.769231	0.021978	0	0.010989	0.010989	0.010989	0.120879	0	0	0	0	0.0549451	0	21	0.0952381	0	0.047619	0.047619	0.047619	0.52381	0	0	0	0	0.238095	0		1.75	0.5	3.5	10.5682	6.03896	0.058123
2011-11-06	mound	8	128	1	0	70	0	15	3	0	0	0	0	0	4	221	0.579186	0.00452489	0	0.316742	0	0.0678733	0.0135747	0	0	0	0	0	0.0180995	93	0.0107527	0	0.752688	0	0.16129	0.0322581	0	0	0	0	0	0.0430108		7.75	0		402.75	51.9677	0.058123
2011-11-06	mound	9	29	0	0	0	0	0	0	0	0	0	0	0	30	59	0.491525	0	0	0	0	0	0	0	0	0	0	0	0.508475	30	0	0	0	0	0	0	0	0	0	0	0	1		2.5	0		75	30	0.058123
2011-11-06	mound	10	123	0	98	1	0	4	3	0	0	0	0	0	0	229	0.537118	0	0.427948	0.00436681	0	0.0174672	0.0131004	0	0	0	0	0	0	106	0	0.924528	0.00943396	0	0.0377358	0.0283019	0	0	0	0	0	0		8.83333	0		790.333	89.4717	0.058123
2011-11-06	mound	11	96	0	0	0	0	40	0	0	0	0	0	0	0	136	0.705882	0	0	0	0	0.294118	0	0	0	0	0	0	0	40	0	0	0	0	1	0	0	0	0	0	0	0		3.33333	0		133.333	40	0.058123
2011-11-06	mound	12	43	0	0	0	1	0	1	0	0	0	0	0	29	74	0.581081	0	0	0	0.0135135	0	0.0135135	0	0	0	0	0	0.391892	31	0	0	0	0.0322581	0	0.0322581	0	0	0	0	0	0.935484		2.58333	0		69.3561	26.8475	0.058123
2011-11-06	mound	13	117	0	0	1	0	0	84	0	0	0	0	3	0	205	0.570732	0	0	0.00487805	0	0	0.409756	0	0	0	0	0.0146341	0	88	0	0	0.0113636	0	0	0.954545	0	0	0	0	0.0340909	0		7.33333	0		583.697	79.595	0.058123
2011-11-06	mound	14	70	0	1	0	1	27	0	0	0	0	0	29	0	128	0.546875	0	0.0078125	0	0.0078125	0.210938	0	0	0	0	0	0.226562	0	58	0	0.0172414	0	0.0172414	0.465517	0	0	0	0	0	0.5	0		4.83333	0		117.424	24.2947	0.058123
2011-11-06	mound	15	88	0	1	16	0	4	31	0	0	0	0	0	1	141	0.624113	0	0.0070922	0.113475	0	0.0283688	0.219858	0	0	0	0	0	0.0070922	53	0	0.0188679	0.301887	0	0.0754717	0.584906	0	0	0	0	0	0.0188679		4.41667	0		90.9924	20.6021	0.058123
2011-11-06	mound	16	33	1	0	4	1	0	1	0	0	0	0	45	0	85	0.388235	0.0117647	0	0.0470588	0.0117647	0	0.0117647	0	0	0	0	0.529412	0	52	0.0192308	0	0.0769231	0.0192308	0	0.0192308	0	0	0	0	0.865385	0		4.33333	0		165.333	38.1538	0.058123
2011-11-06	mound	17	114	1	0	0	0	44	14	0	0	0	0	2	2	177	0.644068	0.00564972	0	0	0	0.248588	0.079096	0	0	0	0	0.0112994	0.0112994	63	0.015873	0	0	0	0.698413	0.222222	0	0	0	0	0.031746	0.031746		5.25	0		164.568	31.3463	0.058123
2011-11-06	mound	18	41	1	1	0	0	0	0	0	0	0	0	0	53	96	0.427083	0.0104167	0.0104167	0	0	0	0	0	0	0	0	0	0.552083	55	0.0181818	0.0181818	0	0	0	0	0	0	0	0	0	0.963636		4.58333	0		232.629	50.7554	0.058123
2011-11-06	mound	19	127	0	63	0	0	0	2	0	0	0	0	0	0	192	0.661458	0	0.328125	0	0	0	0.0104167	0	0	0	0	0	0	65	0	0.969231	0	0	0	0.0307692	0	0	0	0	0	0		5.41667	0		329.174	60.7706	0.058123
2011-11-06	mound	20	127	5	44	1	1	0	1	0	0	0	0	4	0	183	0.693989	0.0273224	0.240437	0.00546448	0.00546448	0	0.00546448	0	0	0	0	0.0218579	0	56	0.0892857	0.785714	0.0178571	0.0178571	0	0.0178571	0	0	0	0	0.0714286	0		4.66667	0.5	9.33333	156.242	33.4805	0.058123
2011-11-06	mound	21	168	1	0	1	1	83	1	0	0	0	0	0	0	255	0.658824	0.00392157	0	0.00392157	0.00392157	0.32549	0.00392157	0	0	0	0	0	0	87	0.0114943	0	0.0114943	0.0114943	0.954023	0.0114943	0	0	0	0	0	0		7.25	0		569.295	78.5235	0.058123
2011-11-06	mound	22	131	0	1	58	0	4	10	0	0	0	0	0	0	204	0.642157	0	0.00490196	0.284314	0	0.0196078	0.0490196	0	0	0	0	0	0	73	0	0.0136986	0.794521	0	0.0547945	0.136986	0	0	0	0	0	0		6.08333	0		276.083	45.3836	0.058123
2011-11-06	mound	23	112	0	64	0	0	1	1	0	0	0	0	0	0	178	0.629213	0	0.359551	0	0	0.00561798	0.00561798	0	0	0	0	0	0	66	0	0.969697	0	0	0.0151515	0.0151515	0	0	0	0	0	0		5.5	0		339.545	61.7355	0.058123
2011-11-06	mound	24	129	0	1	0	0	1	1	0	0	0	0	42	0	174	0.741379	0	0.00574713	0	0	0.00574713	0.00574713	0	0	0	0	0.241379	0	45	0	0.0222222	0	0	0.0222222	0.0222222	0	0	0	0	0.933333	0		3.75	0		145.295	38.7455	0.058123
2011-11-06	mound	25	143	1	0	0	0	0	0	0	0	0	0	0	0	144	0.993056	0.00694444	0	0	0	0	0	0	0	0	0	0	0	1	1	0	0	0	0	0	0	0	0	0	0	0		0.0833333	0		0.0833333	1	0.058123
2011-11-06	mound	26	119	0	0	0	1	51	6	0	0	0	0	2	0	179	0.664804	0	0	0	0.00558659	0.284916	0.0335196	0	0	0	0	0.0111732	0	60	0	0	0	0.0166667	0.85	0.1	0	0	0	0	0.0333333	0		5	0		212.909	42.5818	0.058123
2011-11-06	mound	27	153	0	0	0	0	0	2	0	0	0	0	0	0	155	0.987097	0	0	0	0	0	0.0129032	0	0	0	0	0	0	2	0	0	0	0	0	1	0	0	0	0	0	0		0.166667	0		0.333333	2	0.058123
2011-11-06	mound	28	25	0	0	0	0	0	0	0	0	0	0	0	29	54	0.462963	0	0	0	0	0	0	0	0	0	0	0	0.537037	29	0	0	0	0	0	0	0	0	0	0	0	1		2.41667	0		70.0833	29	0.058123
2011-11-06	mound	29	88	0	0	0	0	25	11	0	0	0	0	0	0	124	0.709677	0	0	0	0	0.201613	0.0887097	0	0	0	0	0	0	36	0	0	0	0	0.694444	0.305556	0	0	0	0	0	0		3	0		58	19.3333	0.058123
2011-11-06	mound	30	197	0	0	0	0	0	5	0	0	0	0	0	0	202	0.975248	0	0	0	0	0	0.0247525	0	0	0	0	0	0	5	0	0	0	0	0	1	0	0	0	0	0	0		0.416667	0		2.08333	5	0.058123
2011-11-06	mound	31	122	0	1	0	0	60	5	0	0	0	0	0	0	188	0.648936	0	0.00531915	0	0	0.319149	0.0265957	0	0	0	0	0	0	66	0	0.0151515	0	0	0.909091	0.0757576	0	0	0	0	0	0		5.5	0		296.636	53.9339	0.058123
2011-11-06	mound	32	87	0	0	0	60	0	3	0	0	0	0	0	0	150	0.58	0	0	0	0.4	0	0.02	0	0	0	0	0	0	63	0	0	0	0.952381	0	0.047619	0	0	0	0	0	0		5.25	0		298.023	56.7662	0.058123
2011-11-06	mound	33	71	0	0	2	2	0	6	0	0	0	0	63	0	144	0.493056	0	0	0.0138889	0.0138889	0	0.0416667	0	0	0	0	0.4375	0	73	0	0	0.0273973	0.0273973	0	0.0821918	0	0	0	0	0.863014	0		6.08333	0		324.447	53.3337	0.058123
2011-11-06	mound	34	234	0	0	0	1	0	3	0	0	0	0	1	0	239	0.979079	0	0	0	0.0041841	0	0.0125523	0	0	0	0	0.0041841	0	5	0	0	0	0.2	0	0.6	0	0	0	0	0.2	0		0.416667	0		0.810606	1.94545	0.058123
2011-11-06	mound	35	80	0	0	0	0	44	0	0	0	0	0	0	0	124	0.645161	0	0	0	0	0.354839	0	0	0	0	0	0	0	44	0	0	0	0	1	0	0	0	0	0	0	0		3.66667	0		161.333	44	0.058123
2011-11-06	mound	36	36	0	0	0	0	0	0	1	0	0	0	0	43	80	0.45	0	0	0	0	0	0	0.0125	0	0	0	0	0.5375	44	0	0	0	0	0	0	0.0227273	0	0	0	0	0.977273		3.66667	0		153.515	41.8678	0.058123
2011-11-06	mound	37	101	0	0	0	0	0	66	3	0	0	0	0	0	170	0.594118	0	0	0	0	0	0.388235	0.0176471	0	0	0	0	0	69	0	0	0	0	0	0.956522	0.0434783	0	0	0	0	0		5.75	0		360.75	62.7391	0.058123
2011-11-06	mound	38	105	0	0	60	0	0	4	0	0	0	0	0	0	169	0.621302	0	0	0.35503	0	0	0.0236686	0	0	0	0	0	0	64	0	0	0.9375	0	0	0.0625	0	0	0	0	0	0		5.33333	0		297.697	55.8182	0.058123
2011-11-06	mound	39	127	1	0	13	1	56	12	0	0	0	0	0	0	210	0.604762	0.0047619	0	0.0619048	0.0047619	0.266667	0.0571429	0	0	0	0	0	0	83	0.0120482	0	0.156627	0.0120482	0.674699	0.144578	0	0	0	0	0	0		6.91667	0		261.538	37.8127	0.058123
2011-11-06	mound	40	88	0	0	0	21	1	41	0	0	0	0	0	0	151	0.582781	0	0	0	0.139073	0.00662252	0.271523	0	0	0	0	0	0	63	0	0	0	0.333333	0.015873	0.650794	0	0	0	0	0	0		5.25	0		162.932	31.0346	0.058123
2011-11-06	mound	41	118	0	5	0	0	0	4	0	0	0	0	0	0	127	0.929134	0	0.0393701	0	0	0	0.0314961	0	0	0	0	0	0	9	0	0.555556	0	0	0	0.444444	0	0	0	0	0	0		0.75	0		3.11364	4.15152	0.058123
2011-11-06	mound	42	25	0	0	0	0	0	6	0	0	0	0	0	40	71	0.352113	0	0	0	0	0	0.084507	0	0	0	0	0	0.56338	46	0	0	0	0	0	0.130435	0	0	0	0	0	0.869565		3.83333	0		132.697	34.6166	0.058123
2011-11-06	mound	43	110	0	3	0	2	0	4	0	0	0	65	2	0	186	0.591398	0	0.016129	0	0.0107527	0	0.0215054	0	0	0	0.349462	0.0107527	0	76	0	0.0394737	0	0.0263158	0	0.0526316	0	0	0	0.855263	0.0263158	0		6.33333	0		343.333	54.2105	0.058123
2011-11-06	mound	44	114	4	0	36	3	14	4	0	0	0	0	1	0	176	0.647727	0.0227273	0	0.204545	0.0170455	0.0795455	0.0227273	0	0	0	0	0.00568182	0	62	0.0645161	0	0.580645	0.0483871	0.225806	0.0645161	0	0	0	0	0.016129	0		5.16667	0.5	10.3333	110.333	21.3548	0.058123
2011-11-06	mound	45	107	0	0	40	0	4	24	0	0	0	0	0	1	176	0.607955	0	0	0.227273	0	0.0227273	0.136364	0	0	0	0	0	0.00568182	69	0	0	0.57971	0	0.057971	0.347826	0	0	0	0	0	0.0144928		5.75	0		163.295	28.3992	0.058123
2011-11-06	mound	46	100	0	6	1	1	0	4	0	0	0	0	26	0	138	0.724638	0	0.0434783	0.00724638	0.00724638	0	0.0289855	0	0	0	0	0.188406	0	38	0	0.157895	0.0263158	0.0263158	0	0.105263	0	0	0	0	0.684211	0		3.16667	0		55.4242	17.5024	0.058123
2011-11-06	mound	47	79	0	0	0	0	2	37	0	0	0	0	0	0	118	0.669492	0	0	0	0	0.0169492	0.313559	0	0	0	0	0	0	39	0	0	0	0	0.0512821	0.948718	0	0	0	0	0	0		3.25	0		113.295	34.8601	0.058123
2011-11-06	mound	48	179	0	0	0	0	0	1	0	0	0	0	0	0	180	0.994444	0	0	0	0	0	0.00555556	0	0	0	0	0	0	1	0	0	0	0	0	1	0	0	0	0	0	0		0.0833333	0		0.0833333	1	0.058123
2011-11-08	mound	1	178	0	1	2	2	0	3	0	0	0	0	24	0	210	0.847619	0	0.0047619	0.00952381	0.00952381	0	0.0142857	0	0	0	0	0.114286	0	32	0	0.03125	0.0625	0.0625	0	0.09375	0	0	0	0	0.75	0		2.66667	0		46.2424	17.3409	0.0254777
2011-11-08	mound	2	73	0	37	0	0	0	0	0	0	0	0	0	0	110	0.663636	0	0.336364	0	0	0	0	0	0	0	0	0	0	37	0	1	0	0	0	0	0	0	0	0	0	0		3.08333	0		114.083	37	0.0254777
2011-11-08	mound	3	137	0	0	0	0	0	5	0	0	0	0	18	0	160	0.85625	0	0	0	0	0	0.03125	0	0	0	0	0.1125	0	23	0	0	0	0	0	0.217391	0	0	0	0	0.782609	0		1.91667	0		27.7197	14.4625	0.0254777
2011-11-08	mound	4	109	1	6	0	2	2	0	0	0	0	0	0	77	197	0.553299	0.00507614	0.0304569	0	0.0101523	0.0101523	0	0	0	0	0	0	0.390863	88	0.0113636	0.0681818	0	0.0227273	0.0227273	0	0	0	0	0	0	0.875		7.33333	0		484.424	66.0579	0.0254777
2011-11-08	mound	5	25	0	0	0	0	0	0	0	0	0	0	1	31	57	0.438596	0	0	0	0	0	0	0	0	0	0	0.0175439	0.54386	32	0	0	0	0	0	0	0	0	0	0	0.03125	0.96875		2.66667	0		79.697	29.8864	0.0254777
2011-11-08	mound	6	68	0	0	0	0	0	1	0	0	0	42	0	0	111	0.612613	0	0	0	0	0	0.00900901	0	0	0	0.378378	0	0	43	0	0	0	0	0	0.0232558	0	0	0	0.976744	0	0		3.58333	0		146.447	40.8689	0.0254777
2011-11-08	mound	7	25	0	0	0	0	0	0	0	0	0	0	0	86	111	0.225225	0	0	0	0	0	0	0	0	0	0	0	0.774775	86	0	0	0	0	0	0	0	0	0	0	0	1		7.16667	0		616.333	86	0.0254777
2011-11-08	mound	8	35	0	0	0	0	0	0	0	0	0	0	1	58	94	0.37234	0	0	0	0	0	0	0	0	0	0	0.0106383	0.617021	59	0	0	0	0	0	0	0	0	0	0	0.0169492	0.983051		4.91667	0		279.538	56.8552	0.0254777
2011-11-08	mound	9	25	0	0	0	0	0	0	0	0	0	0	0	34	59	0.423729	0	0	0	0	0	0	0	0	0	0	0	0.576271	34	0	0	0	0	0	0	0	0	0	0	0	1		2.83333	0		96.3333	34	0.0254777
2011-11-08	mound	10	210	3	49	0	0	0	3	2	0	0	0	21	0	288	0.729167	0.0104167	0.170139	0	0	0	0.0104167	0.00694444	0	0	0	0.0729167	0	78	0.0384615	0.628205	0	0	0	0.0384615	0.025641	0	0	0	0.269231	0		6.5	0		214.273	32.965	0.0254777
2011-11-08	mound	11	70	1	23	0	0	0	1	2	0	2	0	2	0	101	0.693069	0.00990099	0.227723	0	0	0	0.00990099	0.019802	0	0.019802	0	0.019802	0	31	0.0322581	0.741935	0	0	0	0.0322581	0.0645161	0	0.0645161	0	0.0645161	0		2.58333	0.5	5.16667	42.0833	16.2903	0.0254777
2011-11-08	mound	12	52	0	0	0	0	0	0	0	0	0	0	0	60	112	0.464286	0	0	0	0	0	0	0	0	0	0	0	0.535714	60	0	0	0	0	0	0	0	0	0	0	0	1		5	0		300	60	0.0254777
2011-11-08	mound	13	44	0	0	0	0	0	0	1	0	0	0	1	55	101	0.435644	0	0	0	0	0	0	0.00990099	0	0	0	0.00990099	0.544554	57	0	0	0	0	0	0	0.0175439	0	0	0	0.0175439	0.964912		4.75	0		250.568	52.7512	0.0254777
2011-11-08	mound	14	207	1	1	1	0	0	3	0	0	0	0	2	2	217	0.953917	0.00460829	0.00460829	0.00460829	0	0	0.0138249	0	0	0	0	0.00921659	0.00921659	10	0.1	0.1	0.1	0	0	0.3	0	0	0	0	0.2	0.2		0.833333	0.5	1.66667	1.06061	1.27273	0.0254777
2011-11-08	mound	15	147	0	1	5	3	7	6	0	0	0	0	0	3	172	0.854651	0	0.00581395	0.0290698	0.0174419	0.0406977	0.0348837	0	0	0	0	0	0.0174419	25	0	0.04	0.2	0.12	0.28	0.24	0	0	0	0	0	0.12		2.08333	0.5	4.16667	6.99242	3.35636	0.0254777
2011-11-08	mound	16	90	1	0	1	66	0	0	0	0	0	0	0	0	158	0.56962	0.00632911	0	0.00632911	0.417722	0	0	0	0	0	0	0	0	68	0.0147059	0	0.0147059	0.970588	0	0	0	0	0	0	0	0		5.66667	0		361.152	63.7326	0.0254777
2011-11-08	mound	17	142	0	65	1	0	0	0	0	0	0	0	0	0	208	0.682692	0	0.3125	0.00480769	0	0	0	0	0	0	0	0	0	66	0	0.984848	0.0151515	0	0	0	0	0	0	0	0	0		5.5	0		351.182	63.8512	0.0254777
2011-11-08	mound	18	132	0	102	0	0	0	0	0	0	0	0	1	0	235	0.561702	0	0.434043	0	0	0	0	0	0	0	0	0.00425532	0	103	0	0.990291	0	0	0	0	0	0	0	0	0.00970874	0		8.58333	0		865.538	100.839	0.0254777
2011-11-08	mound	19	120	1	75	0	0	0	0	0	0	0	0	0	0	196	0.612245	0.00510204	0.382653	0	0	0	0	0	0	0	0	0	0	76	0.0131579	0.986842	0	0	0	0	0	0	0	0	0	0		6.33333	0		467.697	73.8469	0.0254777
2011-11-08	mound	20	100	0	41	0	0	0	2	0	0	0	0	0	0	143	0.699301	0	0.286713	0	0	0	0.013986	0	0	0	0	0	0	43	0	0.953488	0	0	0	0.0465116	0	0	0	0	0	0		3.58333	0		139.174	38.8393	0.0254777
2011-11-08	mound	21	51	2	0	0	0	0	0	0	0	0	0	0	70	123	0.414634	0.0162602	0	0	0	0	0	0	0	0	0	0	0.569106	72	0.0277778	0	0	0	0	0	0	0	0	0	0	0.972222		6	0		406.545	67.7576	0.0254777
2011-11-08	mound	22	64	1	2	0	0	0	0	0	0	0	0	32	0	99	0.646465	0.010101	0.020202	0	0	0	0	0	0	0	0	0.323232	0	35	0.0285714	0.0571429	0	0	0	0	0	0	0	0	0.914286	0		2.91667	0		84.2652	28.8909	0.0254777
2011-11-08	mound	23	86	0	53	0	2	0	0	2	0	0	0	0	0	143	0.601399	0	0.370629	0	0.013986	0	0	0.013986	0	0	0	0	0	57	0	0.929825	0	0.0350877	0	0	0.0350877	0	0	0	0	0		4.75	0		231.477	48.7321	0.0254777
2011-11-08	mound	24	221	1	2	1	2	1	19	68	0	0	1	20	0	336	0.657738	0.00297619	0.00595238	0.00297619	0.00595238	0.00297619	0.0565476	0.202381	0	0	0.00297619	0.0595238	0	115	0.00869565	0.0173913	0.00869565	0.0173913	0.00869565	0.165217	0.591304	0	0	0.00869565	0.173913	0		9.58333	1	9.58333	390.447	40.7423	0.0254777
2011-11-08	mound	25	62	1	21	0	0	0	1	20	0	1	0	0	0	106	0.584906	0.00943396	0.198113	0	0	0	0.00943396	0.188679	0	0.00943396	0	0	0	44	0.0227273	0.477273	0	0	0	0.0227273	0.454545	0	0.0227273	0	0	0		3.66667	0		62.0606	16.9256	0.0254777
2011-11-08	mound	26	107	0	1	1	0	1	3	1	0	0	0	0	71	185	0.578378	0	0.00540541	0.00540541	0	0.00540541	0.0162162	0.00540541	0	0	0	0	0.383784	78	0	0.0128205	0.0128205	0	0.0128205	0.0384615	0.0128205	0	0	0	0	0.910256		6.5	0.5	13	413.364	63.5944	0.0254777
2011-11-08	mound	27	71	0	2	0	0	1	1	0	0	0	0	0	23	98	0.72449	0	0.0204082	0	0	0.0102041	0.0102041	0	0	0	0	0	0.234694	27	0	0.0740741	0	0	0.037037	0.037037	0	0	0	0	0	0.851852		2.25	0		43.1136	19.1616	0.0254777
2011-11-08	mound	28	60	0	2	0	0	0	3	37	0	0	0	0	0	102	0.588235	0	0.0196078	0	0	0	0.0294118	0.362745	0	0	0	0	0	42	0	0.047619	0	0	0	0.0714286	0.880952	0	0	0	0	0		3.5	0		112.273	32.0779	0.0254777
2011-11-08	mound	29	78	1	2	0	5	2	0	0	0	0	0	11	25	124	0.629032	0.00806452	0.016129	0	0.0403226	0.016129	0	0	0	0	0	0.0887097	0.201613	46	0.0217391	0.0434783	0	0.108696	0.0434783	0	0	0	0	0	0.23913	0.543478		3.83333	0.5	7.66667	54.8788	14.3162	0.0254777
2011-11-08	mound	30	37	3	12	0	0	12	0	0	0	0	0	0	0	64	0.578125	0.046875	0.1875	0	0	0.1875	0	0	0	0	0	0	0	27	0.111111	0.444444	0	0	0.444444	0	0	0	0	0	0	0		2.25	0		21.4773	9.54545	0.0254777
2011-11-08	mound	31	92	0	0	0	0	1	0	0	0	0	46	0	0	139	0.661871	0	0	0	0	0.00719424	0	0	0	0	0.330935	0	0	47	0	0	0	0	0.0212766	0	0	0	0	0.978723	0	0		3.91667	0		175.72	44.8646	0.0254777
2011-11-08	mound	32	182	9	32	0	1	12	8	2	0	0	0	0	0	246	0.739837	0.0365854	0.130081	0	0.00406504	0.0487805	0.0325203	0.00813008	0	0	0	0	0	64	0.140625	0.5	0	0.015625	0.1875	0.125	0.03125	0	0	0	0	0		5.33333	0.5	10.6667	88.7879	16.6477	0.0254777
2011-11-08	mound	33	43	0	0	0	0	0	0	0	0	0	0	87	0	130	0.330769	0	0	0	0	0	0	0	0	0	0	0.669231	0	87	0	0	0	0	0	0	0	0	0	0	1	0		7.25	0		630.75	87	0.0254777
2011-11-08	mound	34	107	0	0	0	0	40	0	0	0	0	0	0	0	147	0.727891	0	0	0	0	0.272109	0	0	0	0	0	0	0	40	0	0	0	0	1	0	0	0	0	0	0	0		3.33333	0		133.333	40	0.0254777
2011-11-08	mound	35	110	0	2	0	0	32	0	0	0	0	0	0	0	144	0.763889	0	0.0138889	0	0	0.222222	0	0	0	0	0	0	0	34	0	0.0588235	0	0	0.941176	0	0	0	0	0	0	0		2.83333	0		84.697	29.893	0.0254777
2011-11-08	mound	36	57	5	25	0	0	0	1	0	0	0	0	0	0	88	0.647727	0.0568182	0.284091	0	0	0	0.0113636	0	0	0	0	0	0	31	0.16129	0.806452	0	0	0	0.0322581	0	0	0	0	0	0		2.58333	0		51.9015	20.0909	0.0254777
2011-11-08	mound	37	102	1	0	0	0	0	0	0	0	0	0	0	3	106	0.962264	0.00943396	0	0	0	0	0	0	0	0	0	0	0.0283019	4	0.25	0	0	0	0	0	0	0	0	0	0	0.75		0.333333	0		0.787879	2.36364	0.0254777
2011-11-08	mound	38	152	0	88	0	0	0	3	0	0	0	0	0	0	243	0.625514	0	0.36214	0	0	0	0.0123457	0	0	0	0	0	0	91	0	0.967033	0	0	0	0.032967	0	0	0	0	0	0		7.58333	0		642.083	84.6703	0.0254777
2011-11-08	mound	39	106	0	59	1	0	0	0	0	0	0	0	0	0	166	0.638554	0	0.355422	0.0060241	0	0	0	0	0	0	0	0	0	60	0	0.983333	0.0166667	0	0	0	0	0	0	0	0	0		5	0		289.273	57.8545	0.0254777
2011-11-08	mound	40	76	0	1	0	0	0	1	0	0	0	0	0	82	160	0.475	0	0.00625	0	0	0	0.00625	0	0	0	0	0	0.5125	84	0	0.0119048	0	0	0	0.0119048	0	0	0	0	0	0.97619		7	0		558	79.7143	0.0254777
2011-11-08	mound	41	68	0	0	0	1	0	4	1	0	0	38	1	0	113	0.60177	0	0	0	0.00884956	0	0.0353982	0.00884956	0	0	0.336283	0.00884956	0	45	0	0	0	0.0222222	0	0.0888889	0.0222222	0	0	0.844444	0.0222222	0		3.75	0		117.659	31.3758	0.0254777
2011-11-08	mound	42	102	5	0	0	0	1	0	0	0	0	0	62	0	170	0.6	0.0294118	0	0	0	0.00588235	0	0	0	0	0	0.364706	0	68	0.0735294	0	0	0	0.0147059	0	0	0	0	0	0.911765	0		5.66667	0		316.788	55.9037	0.0254777
2011-11-08	mound	43	185	0	0	0	0	0	3	0	0	0	0	0	0	188	0.984043	0	0	0	0	0	0.0159574	0	0	0	0	0	0	3	0	0	0	0	0	1	0	0	0	0	0	0		0.25	0		0.75	3	0.0254777
2011-11-08	mound	44	158	1	77	0	0	0	1	0	0	0	0	0	6	243	0.650206	0.00411523	0.316872	0	0	0	0.00411523	0	0	0	0	0	0.0246914	85	0.0117647	0.905882	0	0	0	0.0117647	0	0	0	0	0	0.0705882		7.08333	0		487.72	68.8545	0.0254777
2011-11-08	mound	45	143	3	0	0	3	0	0	0	0	0	9	0	0	158	0.905063	0.0189873	0	0	0.0189873	0	0	0	0	0	0.056962	0	0	15	0.2	0	0	0.2	0	0	0	0	0	0.6	0	0		1.25	0		7.29545	5.83636	0.0254777
2011-11-08	mound	46	86	0	1	0	0	39	0	0	0	0	0	5	0	131	0.656489	0	0.00763359	0	0	0.29771	0	0	0	0	0	0.0381679	0	45	0	0.0222222	0	0	0.866667	0	0	0	0	0	0.111111	0		3.75	0		125.295	33.4121	0.0254777
2011-11-08	mound	47	61	46	1	0	0	0	0	0	0	0	0	0	0	108	0.564815	0.425926	0.00925926	0	0	0	0	0	0	0	0	0	0	47	0.978723	0.0212766	0	0	0	0	0	0	0	0	0	0		3.91667	0		175.72	44.8646	0.0254777
2011-11-08	mound	48	52	0	2	2	0	2	0	0	0	0	1	0	63	122	0.42623	0	0.0163934	0.0163934	0	0.0163934	0	0	0	0	0.00819672	0	0.516393	70	0	0.0285714	0.0285714	0	0.0285714	0	0	0	0	0.0142857	0	0.9		5.83333	0		324.879	55.6935	0.0254777
2011-11-10	mound	1	76	1	0	1	0	1	0	52	0	0	0	0	0	131	0.580153	0.00763359	0	0.00763359	0	0.00763359	0	0.396947	0	0	0	0	0	55	0.0181818	0	0.0181818	0	0.0181818	0	0.945455	0	0	0	0	0		4.58333	0		223.174	48.6926
2011-11-10	mound	2	117	0	0	49	0	0	1	0	0	0	0	2	0	169	0.692308	0	0	0.289941	0	0	0.00591716	0	0	0	0	0.0118343	0	52	0	0	0.942308	0	0	0.0192308	0	0	0	0	0.0384615	0		4.33333	0		198.242	45.7483
2011-11-10	mound	3	110	0	0	0	0	0	4	71	0	0	0	0	0	185	0.594595	0	0	0	0	0	0.0216216	0.383784	0	0	0	0	0	75	0	0	0	0	0	0.0533333	0.946667	0	0	0	0	0		6.25	0		417.114	66.7382
2011-11-10	mound	4	52	1	0	0	1	0	1	26	0	0	0	0	0	81	0.641975	0.0123457	0	0	0.0123457	0	0.0123457	0.320988	0	0	0	0	0	29	0.0344828	0	0	0.0344828	0	0.0344828	0.896552	0	0	0	0	0		2.41667	0		55.3561	22.906
2011-11-10	mound	5	88	0	3	1	1	20	7	15	0	0	0	0	0	135	0.651852	0	0.0222222	0.00740741	0.00740741	0.148148	0.0518519	0.111111	0	0	0	0	0	47	0	0.0638298	0.0212766	0.0212766	0.425532	0.148936	0.319149	0	0	0	0	0		3.91667	0.5	7.83333	45.5379	11.6267
2011-11-10	mound	6	130	2	49	0	0	0	0	23	0	0	0	0	0	204	0.637255	0.00980392	0.240196	0	0	0	0	0.112745	0	0	0	0	0	74	0.027027	0.662162	0	0	0	0	0.310811	0	0	0	0	0		6.16667	0		225.242	36.5258
2011-11-10	mound	7	46	0	0	15	0	0	1	14	0	0	0	0	0	76	0.605263	0	0	0.197368	0	0	0.0131579	0.184211	0	0	0	0	0	30	0	0	0.5	0	0	0.0333333	0.466667	0	0	0	0	0		2.5	0		31.5455	12.6182
2011-11-10	mound	8	78	1	32	1	1	0	0	1	0	0	0	0	0	114	0.684211	0.00877193	0.280702	0.00877193	0.00877193	0	0	0.00877193	0	0	0	0	0	36	0.0277778	0.888889	0.0277778	0.0277778	0	0	0.0277778	0	0	0	0	0		3	0		83.6364	27.8788
2011-11-10	mound	9	80	0	4	0	0	0	3	50	0	0	0	0	0	137	0.583942	0	0.0291971	0	0	0	0.0218978	0.364964	0	0	0	0	0	57	0	0.0701754	0	0	0	0.0526316	0.877193	0	0	0	0	0		4.75	0		204.932	43.1435
2011-11-10	mound	10	14	0	0	1	3	0	0	1	0	0	0	0	43	62	0.225806	0	0	0.016129	0.0483871	0	0	0.016129	0	0	0	0	0.693548	48	0	0	0.0208333	0.0625	0	0	0.0208333	0	0	0	0	0.895833		4	0		151.636	37.9091
2011-11-10	mound	11	53	3	0	9	7	0	0	0	0	0	0	0	19	91	0.582418	0.032967	0	0.0989011	0.0769231	0	0	0	0	0	0	0	0.208791	38	0.0789474	0	0.236842	0.184211	0	0	0	0	0	0	0	0.5		3.16667	0		34.5152	10.8995
2011-11-10	mound	12	101	0	0	1	0	9	1	62	0	0	0	0	0	174	0.58046	0	0	0.00574713	0	0.0517241	0.00574713	0.356322	0	0	0	0	0	73	0	0	0.0136986	0	0.123288	0.0136986	0.849315	0	0	0	0	0		6.08333	0		316.629	52.0486
2011-11-10	mound	13	93	1	0	0	0	35	0	0	0	0	0	0	0	129	0.72093	0.00775194	0	0	0	0.271318	0	0	0	0	0	0	0	36	0.0277778	0	0	0	0.972222	0	0	0	0	0	0	0		3	0		101.636	33.8788
2011-11-10	mound	14	126	1	5	0	1	2	56	4	0	1	0	0	0	196	0.642857	0.00510204	0.0255102	0	0.00510204	0.0102041	0.285714	0.0204082	0	0.00510204	0	0	0	70	0.0142857	0.0714286	0	0.0142857	0.0285714	0.8	0.0571429	0	0.0142857	0	0	0		5.83333	1	5.83333	252.333	43.2571
2011-11-10	mound	15	22	0	0	0	2	0	0	0	0	0	0	0	27	51	0.431373	0	0	0	0.0392157	0	0	0	0	0	0	0	0.529412	29	0	0	0	0.0689655	0	0	0	0	0	0	0	0.931034		2.41667	0		60.2652	24.9373
2011-11-10	mound	16	51	1	0	0	0	0	0	0	0	0	16	0	0	68	0.75	0.0147059	0	0	0	0	0	0	0	0	0.235294	0	0	17	0.0588235	0	0	0	0	0	0	0	0	0.941176	0	0		1.41667	0		21.1742	14.9465
2011-11-10	mound	17	75	0	21	1	1	1	1	10	0	0	0	0	0	110	0.681818	0	0.190909	0.00909091	0.00909091	0.00909091	0.00909091	0.0909091	0	0	0	0	0	35	0	0.6	0.0285714	0.0285714	0.0285714	0.0285714	0.285714	0	0	0	0	0		2.91667	0.5	5.83333	40.2652	13.8052
2011-11-10	mound	18	56	0	0	0	0	0	3	42	0	0	0	0	0	101	0.554455	0	0	0	0	0	0.029703	0.415842	0	0	0	0	0	45	0	0	0	0	0	0.0666667	0.933333	0	0	0	0	0		3.75	0		145.841	38.8909
2011-11-10	mound	19	111	0	1	18	0	26	5	2	0	0	0	0	0	163	0.680982	0	0.00613497	0.110429	0	0.159509	0.0306748	0.0122699	0	0	0	0	0	52	0	0.0192308	0.346154	0	0.5	0.0961538	0.0384615	0	0	0	0	0		4.33333	0		73.1515	16.8811
2011-11-10	mound	20	8	0	0	0	0	0	0	0	0	0	0	0	32	40	0.2	0	0	0	0	0	0	0	0	0	0	0	0.8	32	0	0	0	0	0	0	0	0	0	0	0	1		2.66667	0		85.3333	32
2011-11-10	mound	21	191	2	14	16	0	0	2	71	0	0	0	0	0	296	0.64527	0.00675676	0.0472973	0.0540541	0	0	0.00675676	0.239865	0	0	0	0	0	105	0.0190476	0.133333	0.152381	0	0	0.0190476	0.67619	0	0	0	0	0		8.75	0		416.568	47.6078
2011-11-10	mound	22	106	0	0	1	0	0	1	15	0	0	0	5	0	128	0.828125	0	0	0.0078125	0	0	0.0078125	0.117188	0	0	0	0.0390625	0	22	0	0	0.0454545	0	0	0.0454545	0.681818	0	0	0	0.227273	0		1.83333	0		19.2424	10.4959
2011-11-10	mound	23	103	9	52	0	1	0	0	0	0	0	0	0	0	165	0.624242	0.0545455	0.315152	0	0.00606061	0	0	0	0	0	0	0	0	62	0.145161	0.83871	0	0.016129	0	0	0	0	0	0	0	0		5.16667	0		224.152	43.3842
2011-11-10	mound	24	90	2	0	0	2	1	1	67	0	0	0	0	0	163	0.552147	0.0122699	0	0	0.0122699	0.00613497	0.00613497	0.411043	0	0	0	0	0	73	0.0273973	0	0	0.0273973	0.0136986	0.0136986	0.917808	0	0	0	0	0		6.08333	0		368.629	60.5965
2011-11-10	mound	25	125	1	0	0	0	0	0	6	0	0	0	0	0	132	0.94697	0.00757576	0	0	0	0	0	0.0454545	0	0	0	0	0	7	0.142857	0	0	0	0	0	0.857143	0	0	0	0	0		0.583333	0		2.99242	5.12987
2011-11-10	mound	26	74	0	0	0	0	2	0	40	0	0	0	0	0	116	0.637931	0	0	0	0	0.0172414	0	0.344828	0	0	0	0	0	42	0	0	0	0	0.047619	0	0.952381	0	0	0	0	0		3.5	0		132.455	37.8442
2011-11-10	mound	27	98	0	1	0	0	0	0	0	0	0	10	4	0	113	0.867257	0	0.00884956	0	0	0	0	0	0	0	0.0884956	0.0353982	0	15	0	0.0666667	0	0	0	0	0	0	0	0.666667	0.266667	0		1.25	0		8.93182	7.14545
2011-11-10	mound	28	18	0	0	0	0	0	0	0	0	0	0	0	37	55	0.327273	0	0	0	0	0	0	0	0	0	0	0	0.672727	37	0	0	0	0	0	0	0	0	0	0	0	1		3.08333	0		114.083	37
2011-11-10	mound	29	29	0	3	0	0	0	1	6	0	0	0	0	0	39	0.74359	0	0.0769231	0	0	0	0.025641	0.153846	0	0	0	0	0	10	0	0.3	0	0	0	0.1	0.6	0	0	0	0	0		0.833333	0		3.42424	4.10909
2011-11-10	mound	30	108	0	3	0	6	0	25	37	0	0	0	0	0	179	0.603352	0	0.0167598	0	0.0335196	0	0.139665	0.206704	0	0	0	0	0	71	0	0.0422535	0	0.084507	0	0.352113	0.521127	0	0	0	0	0		5.91667	0		147.174	24.8745
2011-11-10	mound	31	74	6	10	2	3	2	3	20	0	0	0	0	0	120	0.616667	0.05	0.0833333	0.0166667	0.025	0.0166667	0.025	0.166667	0	0	0	0	0	46	0.130435	0.217391	0.0434783	0.0652174	0.0434783	0.0652174	0.434783	0	0	0	0	0		3.83333	2	1.91667	35.0606	9.14625
2011-11-10	mound	32	166	1	2	0	0	8	23	65	0	0	0	2	0	267	0.621723	0.00374532	0.00749064	0	0	0.0299625	0.0861423	0.243446	0	0	0	0.00749064	0	101	0.00990099	0.019802	0	0	0.0792079	0.227723	0.643564	0	0	0	0.019802	0		8.41667	0.5	16.8333	361.538	42.955
2011-11-10	mound	33	162	0	59	2	0	1	5	27	0	0	0	0	0	256	0.632812	0	0.230469	0.0078125	0	0.00390625	0.0195312	0.105469	0	0	0	0	0	94	0	0.62766	0.0212766	0	0.0106383	0.0531915	0.287234	0	0	0	0	0		7.83333	0		318.515	40.6615
2011-11-10	mound	34	66	1	0	0	0	19	3	19	1	0	1	0	0	110	0.6	0.00909091	0	0	0	0.172727	0.0272727	0.172727	0.00909091	0	0.00909091	0	0	44	0.0227273	0	0	0	0.431818	0.0681818	0.431818	0.0227273	0	0.0227273	0	0		3.66667	0.5	7.33333	52.0606	14.1983
2011-11-10	mound	35	50	0	0	0	0	0	0	29	0	0	2	0	1	82	0.609756	0	0	0	0	0	0	0.353659	0	0	0.0243902	0	0.0121951	32	0	0	0	0	0	0	0.90625	0	0	0.0625	0	0.03125		2.66667	0		69.1515	25.9318
2011-11-10	mound	36	73	9	0	0	0	1	16	9	0	0	0	0	0	108	0.675926	0.0833333	0	0	0	0.00925926	0.148148	0.0833333	0	0	0	0	0	35	0.257143	0	0	0	0.0285714	0.457143	0.257143	0	0	0	0	0		2.91667	0		28.8106	9.87792
2011-11-10	mound	37	64	2	0	0	0	2	32	10	0	0	0	0	0	110	0.581818	0.0181818	0	0	0	0.0181818	0.290909	0.0909091	0	0	0	0	0	46	0.0434783	0	0	0	0.0434783	0.695652	0.217391	0	0	0	0	0		3.83333	0		86.8788	22.664
2011-11-10	mound	38	133	0	1	0	0	0	2	97	0	0	0	0	0	233	0.570815	0	0.00429185	0	0	0	0.00858369	0.416309	0	0	0	0	0	100	0	0.01	0	0	0	0.02	0.97	0	0	0	0	0		8.33333	0		780.061	93.6073
2011-11-10	mound	39	48	11	3	0	0	1	0	22	0	0	0	0	0	85	0.564706	0.129412	0.0352941	0	0	0.0117647	0	0.258824	0	0	0	0	0	37	0.297297	0.0810811	0	0	0.027027	0	0.594595	0	0	0	0	0		3.08333	0		45.5379	14.769
2011-11-10	mound	40	114	0	0	1	0	0	0	78	0	0	0	0	0	193	0.590674	0	0	0.00518135	0	0	0	0.404145	0	0	0	0	0	79	0	0	0.0126582	0	0	0	0.987342	0	0	0	0	0		6.58333	0		505.902	76.8458
2011-11-10	mound	41	49	0	1	18	1	3	0	0	0	0	0	0	0	72	0.680556	0	0.0138889	0.25	0.0138889	0.0416667	0	0	0	0	0	0	0	23	0	0.0434783	0.782609	0.0434783	0.130435	0	0	0	0	0	0	0		1.91667	0		26.447	13.7984
2011-11-10	mound	42	117	0	5	14	1	5	0	29	0	0	1	0	0	172	0.680233	0	0.0290698	0.0813953	0.00581395	0.0290698	0	0.168605	0	0	0.00581395	0	0	55	0	0.0909091	0.254545	0.0181818	0.0909091	0	0.527273	0	0	0.0181818	0	0		4.58333	0.5	9.16667	76.0833	16.6
2011-11-10	mound	43	39	0	1	0	0	1	0	10	0	0	0	0	60	111	0.351351	0	0.00900901	0	0	0.00900901	0	0.0900901	0	0	0	0	0.540541	72	0	0.0138889	0	0	0.0138889	0	0.138889	0	0	0	0	0.833333		6	0		297.273	49.5455
2011-11-10	mound	44	29	0	0	0	0	0	9	1	0	0	0	0	0	39	0.74359	0	0	0	0	0	0.230769	0.025641	0	0	0	0	0	10	0	0	0	0	0	0.9	0.1	0	0	0	0	0		0.833333	0		6.69697	8.03636
2011-11-10	mound	45	105	2	0	0	3	0	2	52	0	0	0	0	0	164	0.640244	0.0121951	0	0	0.0182927	0	0.0121951	0.317073	0	0	0	0	0	59	0.0338983	0	0	0.0508475	0	0.0338983	0.881356	0	0	0	0	0		4.91667	0		220.992	44.9476
2011-11-10	mound	46	57	2	0	0	1	0	1	41	0	0	0	0	0	102	0.558824	0.0196078	0	0	0.00980392	0	0.00980392	0.401961	0	0	0	0	0	45	0.0444444	0	0	0.0222222	0	0.0222222	0.911111	0	0	0	0	0		3.75	0		138.023	36.8061
2011-11-10	mound	47	114	3	2	0	2	1	3	74	0	0	0	0	0	199	0.572864	0.0150754	0.0100503	0	0.0100503	0.00502513	0.0150754	0.371859	0	0	0	0	0	85	0.0352941	0.0235294	0	0.0235294	0.0117647	0.0352941	0.870588	0	0	0	0	0		7.08333	0.5	14.1667	445.538	62.8995
2011-11-10	mound	48	89	0	0	0	0	0	0	0	0	0	0	9	0	98	0.908163	0	0	0	0	0	0	0	0	0	0	0.0918367	0	9	0	0	0	0	0	0	0	0	0	0	1	0		0.75	0		6.75	9
2011-11-13	mound	1	182	1	4	2	28	19	0	6	27	0	0	0	0	269	0.67658	0.00371747	0.0148699	0.00743494	0.104089	0.070632	0	0.0223048	0.100372	0	0	0	0	87	0.0114943	0.045977	0.0229885	0.321839	0.218391	0	0.0689655	0.310345	0	0	0	0		7.25	1.5	4.83333	118.205	16.3041	0.089986
2011-11-13	mound	2	170	1	0	0	5	1	2	27	50	0	0	0	0	256	0.664062	0.00390625	0	0	0.0195312	0.00390625	0.0078125	0.105469	0.195312	0	0	0	0	86	0.0116279	0	0	0.0581395	0.0116279	0.0232558	0.313953	0.581395	0	0	0	0		7.16667	0.5	14.3333	240.333	33.5349	0.089986
2011-11-13	mound	3	148	0	0	0	1	103	1	0	0	0	0	0	0	253	0.58498	0	0	0	0.00395257	0.407115	0.00395257	0	0	0	0	0	0	105	0	0	0	0.00952381	0.980952	0.00952381	0	0	0	0	0	0		8.75	0		881.114	100.699	0.089986
2011-11-13	mound	4	229	4	5	1	9	1	5	13	0	0	0	0	0	267	0.857678	0.0149813	0.0187266	0.00374532	0.0337079	0.00374532	0.0187266	0.0486891	0	0	0	0	0	38	0.105263	0.131579	0.0263158	0.236842	0.0263158	0.131579	0.342105	0	0	0	0	0		3.16667	1	3.16667	17.9697	5.67464	0.089986
2011-11-13	mound	5	54	0	1	0	16	4	1	0	0	0	0	0	47	123	0.439024	0	0.00813008	0	0.130081	0.0325203	0.00813008	0	0	0	0	0	0.382114	69	0	0.0144928	0	0.231884	0.057971	0.0144928	0	0	0	0	0	0.681159		5.75	0		189.659	32.9842	0.089986
2011-11-13	mound	6	24	2	1	0	1	0	0	0	0	0	0	0	32	60	0.4	0.0333333	0.0166667	0	0.0166667	0	0	0	0	0	0	0	0.533333	36	0.0555556	0.0277778	0	0.0277778	0	0	0	0	0	0	0	0.888889		3	0		83.8182	27.9394	0.089986
2011-11-13	mound	7	150	6	3	0	16	4	2	35	1	0	0	4	0	221	0.678733	0.0271493	0.0135747	0	0.0723982	0.0180995	0.00904977	0.158371	0.00452489	0	0	0.0180995	0	71	0.084507	0.0422535	0	0.225352	0.056338	0.028169	0.492958	0.0140845	0	0	0.056338	0		5.91667	2.5	2.36667	103.902	17.5608	0.089986
2011-11-13	mound	8	131	20	3	3	5	9	2	4	4	0	1	14	0	196	0.668367	0.102041	0.0153061	0.0153061	0.0255102	0.0459184	0.0102041	0.0204082	0.0204082	0	0.00510204	0.0714286	0	65	0.307692	0.0461538	0.0461538	0.0769231	0.138462	0.0307692	0.0615385	0.0615385	0	0.0153846	0.215385	0		5.41667	3.5	1.54762	36.8106	6.7958	0.089986
2011-11-13	mound	9	46	0	0	0	1	0	0	0	0	0	0	1	70	118	0.389831	0	0	0	0.00847458	0	0	0	0	0	0	0.00847458	0.59322	72	0	0	0	0.0138889	0	0	0	0	0	0	0.0138889	0.972222		6	0		406.364	67.7273	0.089986
2011-11-13	mound	10	139	1	1	0	74	0	3	12	2	0	0	0	0	232	0.599138	0.00431034	0.00431034	0	0.318966	0	0.012931	0.0517241	0.00862069	0	0	0	0	93	0.0107527	0.0107527	0	0.795699	0	0.0322581	0.129032	0.0215054	0	0	0	0		7.75	0.5	15.5	446.75	57.6452	0.089986
2011-11-13	mound	11	120	63	0	0	0	0	2	0	0	0	0	0	0	185	0.648649	0.340541	0	0	0	0	0.0108108	0	0	0	0	0	0	65	0.969231	0	0	0	0	0.0307692	0	0	0	0	0	0		5.41667	0		329.174	60.7706	0.089986
2011-11-13	mound	12	79	0	0	0	0	0	0	0	0	0	44	1	0	124	0.637097	0	0	0	0	0	0	0	0	0	0.354839	0.00806452	0	45	0	0	0	0	0	0	0	0	0	0.977778	0.0222222	0		3.75	0		160.75	42.8667	0.089986
2011-11-13	mound	13	150	0	0	13	17	1	1	28	39	0	0	0	0	249	0.60241	0	0	0.0522088	0.0682731	0.00401606	0.00401606	0.11245	0.156627	0	0	0	0	99	0	0	0.131313	0.171717	0.010101	0.010101	0.282828	0.393939	0	0	0	0		8.25	0.5	16.5	177.114	21.4683	0.089986
2011-11-13	mound	14	63	0	0	0	0	1	0	0	0	0	0	0	54	118	0.533898	0	0	0	0	0.00847458	0	0	0	0	0	0	0.457627	55	0	0	0	0	0.0181818	0	0	0	0	0	0	0.981818		4.58333	0		242.265	52.8579	0.089986
2011-11-13	mound	15	108	0	0	0	1	47	0	0	0	0	0	0	0	156	0.692308	0	0	0	0.00641026	0.301282	0	0	0	0	0	0	0	48	0	0	0	0.0208333	0.979167	0	0	0	0	0	0	0		4	0		183.455	45.8636	0.089986
2011-11-13	mound	16	147	0	1	0	0	0	4	0	0	0	0	0	0	152	0.967105	0	0.00657895	0	0	0	0.0263158	0	0	0	0	0	0	5	0	0.2	0	0	0	0.8	0	0	0	0	0	0		0.416667	0		1.35606	3.25455	0.089986
2011-11-13	mound	17	180	1	0	0	0	0	2	0	0	0	0	0	0	183	0.983607	0.00546448	0	0	0	0	0.010929	0	0	0	0	0	0	3	0.333333	0	0	0	0	0.666667	0	0	0	0	0	0		0.25	0		0.386364	1.54545	0.089986
2011-11-13	mound	18	99	1	0	1	1	42	1	0	0	1	0	0	0	146	0.678082	0.00684932	0	0.00684932	0.00684932	0.287671	0.00684932	0	0	0.00684932	0	0	0	47	0.0212766	0	0.0212766	0.0212766	0.893617	0.0212766	0	0	0.0212766	0	0	0		3.91667	0.5	7.83333	144.083	36.7872	0.089986
2011-11-13	mound	19	190	9	7	1	22	62	2	0	0	0	0	0	0	293	0.648464	0.0307167	0.0238908	0.00341297	0.0750853	0.211604	0.00682594	0	0	0	0	0	0	103	0.0873786	0.0679612	0.00970874	0.213592	0.601942	0.0194175	0	0	0	0	0	0		8.58333	0.5	17.1667	325.356	37.9056	0.089986
2011-11-13	mound	20	182	1	104	0	2	0	2	0	0	0	0	0	0	291	0.62543	0.00343643	0.357388	0	0.00687285	0	0.00687285	0	0	0	0	0	0	109	0.00917431	0.954128	0	0.0183486	0	0.0183486	0	0	0	0	0	0		9.08333	0		894.083	98.4312	0.089986
2011-11-13	mound	21	133	0	0	0	0	0	0	3	50	0	1	0	0	187	0.71123	0	0	0	0	0	0	0.0160428	0.26738	0	0.00534759	0	0	54	0	0	0	0	0	0	0.0555556	0.925926	0	0.0185185	0	0		4.5	0		206.091	45.798	0.089986
2011-11-13	mound	22	93	59	0	0	0	0	3	0	0	0	0	0	0	155	0.6	0.380645	0	0	0	0	0.0193548	0	0	0	0	0	0	62	0.951613	0	0	0	0	0.0483871	0	0	0	0	0	0		5.16667	0		288.152	55.7713	0.089986
2011-11-13	mound	23	130	70	0	0	0	0	0	0	0	0	0	0	3	203	0.640394	0.344828	0	0	0	0	0	0	0	0	0	0	0.0147783	73	0.958904	0	0	0	0	0	0	0	0	0	0	0.0410959		6.08333	0		405.902	66.7235	0.089986
2011-11-13	mound	24	143	0	0	0	0	0	0	0	66	0	0	0	0	209	0.684211	0	0	0	0	0	0	0	0.315789	0	0	0	0	66	0	0	0	0	0	0	0	1	0	0	0	0		5.5	0		363	66	0.089986
[truncated: 63 more columns]
